# Supplementary material
Source: publisher figshare collection journal article supplement (https://acs.figshare.com/ndownloader/files/7496215)
Supplement: Supplementary file 1 [file 7496215]

# Enantioselective Syntheses of Furan Atropisomers by an Oxidative Central-to-Axial Chirality Conversion Strategy

*Vivek S. Raut, Marion Jean, Nicolas Vanthuyne, Christian Roussel, Thierry Constantieux,  
Cyril Bressy, Xavier Bugaut, Damien Bonne, and Jean Rodriguez*

## *SUPPORTING INFORMATION*

|    |                                                                                                          |     |
|----|----------------------------------------------------------------------------------------------------------|-----|
| 1. | General Information .....                                                                                | S2  |
| 2. | General procedure for the preparation of $\alpha$ -chloronitroalkenes .....                              | S3  |
| 3. | General procedure for the enantioselective synthesis of dihydrofurans <b>3a-e</b> .....                  | S4  |
| 4. | General procedure for the oxidation of dihydrofuran <b>3a-e</b> to furan atropisomers <b>4a-e</b> .....  | S8  |
| 5. | General procedure for the enantioselective synthesis of dihydrofurans <b>10a-10m</b> .....               | S11 |
| 6. | General procedure for the oxidation of dihydrofuran <b>9a-m</b> to furan atropisomers <b>10a-m</b> ..... | S19 |
| 7. | Enantiomerisation barrier determination .....                                                            | S26 |
| 8. | <sup>1</sup> H and <sup>13</sup> C NMR spectra .....                                                     | 45  |

## 1. General Information

Reactions were run under argon atmosphere in oven-dried glassware. Unless specified, commercial reagents and solvents were used as received. Commercially available catalysts were purchased from Sigma-Aldrich.  $\text{CHCl}_3$  was dried using a M-Braun SPS- 800 system.

Analytical thin layer chromatography (TLC) was performed on silica gel 60 F254 aluminum plates (Macherey-Nagel) containing a 254 nm fluorescent indicator. TLC plates were visualized by exposure to short wave ultraviolet light (254 nm) and further visualization was achieved by staining  $\text{KMnO}_4$  and heating by a hot air gun. Flash column chromatography was performed using silica gel (35–70  $\mu\text{m}$ , 60 Å, Acros). Organic extracts were dried over anhydrous  $\text{Na}_2\text{SO}_4$  or  $\text{MgSO}_4$ .

Proton nuclear magnetic resonance ( $^1\text{H}$  NMR) spectra were recorded with a Bruker AV 300, AV 400, AV 500 or AV 600 MHz spectrometer. Proton chemical shifts are reported in parts per million ( $\delta$  scale), and are referenced using residual protium in the NMR solvent ( $\text{CDCl}_3$ :  $\delta$  7.26 ( $\text{CHCl}_3$ )). Data are reported as follows: chemical shift (multiplicity (s = singlet, br s = broad singlet, d = doublet, t = triplet, q = quadruplet, quint = quintuplet, sept = septuplet, m = multiplet), coupling constant(s) (Hz), integration). Carbon-13 nuclear magnetic resonance ( $^{13}\text{C}$  NMR) spectra were recorded with Bruker AV 300, AV 400, AV 500 or AV 600 MHz spectrometers. Carbon chemical shifts are reported in parts per million ( $\delta$  scale), and are referenced using the carbon resonances of the solvent ( $\delta$  77.16 ( $\text{CHCl}_3$ )). Data are reported as follows: chemical shift ( $\text{CH}_n$  where n is the number of hydrogen atoms linked to the carbon atom).

HPLC analyses for the determination of enantiomeric excesses were performed on a Merck-Hitachi system equipped with Chiralpak AZ-H, Chiralpak IA, Chiralpak IB, Chiralpak IC, Chiralpak ID, Chiralpak IE, Chiralpak IF, Lux-Cellulose-2 and Lux- Cellulose-4.

Optical Rotations were recorded on an Anton Paar MCP 200 Polarimeter at 589 nm and 25 °C and specific rotations are reported as follows: specific rotation (concentration in grams/100 mL of solution, solvent).

High resolution mass spectra (HRMS) were recorded on a Waters Synapt G2 HDMS apparatus using a positive electrospray (ESI) ionization source.

## 2. General procedure for the preparation of $\alpha$ -chloronitroalkenes

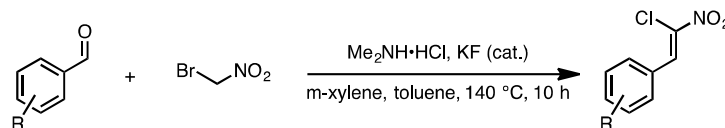

All  $\alpha$ -chloronitroalkenes were prepared according to the literature known procedure<sup>1</sup> with slight modification. Substituted benzaldehyde (16.1 mmol, 1.0 equiv), bromonitromethane (4.5 g, 32.2 mmol, 2.0 equiv), dimethylamine hydrochloride (11.82 g, 144.9 mmol, 9.0 equiv), potassium fluoride (0.14 g, 2.4 mmol, 0.15 equiv), toluene (15 mL) and m-xylenes (45 mL) were combined in a 250 mL round bottomed flask and connected to a Dean-Stark trap. The mixture was heated at 140 °C with azeotropic removal of water for 10 hours. The reaction was cool down up to room temperature and saturated sodium bisulfite (NaHSO<sub>3</sub>, 20 mL) was poured in it. The reaction mixture was vigorously stirred before being partitioned between aqueous and organic layer. After separation of organic layer, the aqueous layer was extracted three times with dichloromethane. The combined organic layers were dried over anhydrous Na<sub>2</sub>SO<sub>4</sub> and concentrated to afford a brown oil. The oily residue was subsequently purified on a silica column using ethyl acetate/hexane mixture to produce the product. The corresponding bromonitroalkene is often isolated (5-10 %) along with the desired product, which can be used as such in the domino Michael/*O*-alkylation reaction. Products **2c** (R = 2-Cl),<sup>1</sup> **2e** (R = CO<sub>2</sub>Me),<sup>2</sup> **2f** (R = 2-NO<sub>2</sub>),<sup>1</sup> and **2j** (R = 2-Me)<sup>1</sup> have been synthesized previously using the described procedure.

### (Z)-1-(2-chloro-2-nitrovinyl)-2-methoxynaphthalene (**2a**).

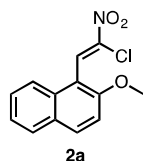

This compound was isolated as a pale yellow solid (3.6 g, 85%); **mp** = 66-67 °C; **R<sub>f</sub>** = 0.50 (ethyl acetate/petroleum ether 1:4); <sup>1</sup>H NMR (400 MHz, CDCl<sub>3</sub>)  $\delta$  8.72 (1H, s, CH), 7.98 (1H, d, *J* = 9.1 Hz, ArH), 7.85 (1H, d, *J* = 8.2 Hz, ArH), 7.63 (1H, d, *J* = 8.7 Hz, ArH), 7.54 (1H, ddd, *J* = 8.7, 6.7, 1.3 Hz, ArH), 7.42 (1H, ddd, *J* = 8.2, 6.7, 1.3 Hz, ArH), 7.32 (1H, d, *J* = 9.1 Hz, ArH), 4.01 (3H, s, CH<sub>3</sub>). <sup>13</sup>C NMR (100 MHz, CDCl<sub>3</sub>)  $\delta$  155.5, 141.7, 132.9, 131.1, 129.3, 128.9, 128.8, 127.9, 124.5, 124.0, 112.8, 112.7, 56.4. **HRMS** (ESI<sup>+</sup>): [M+NH<sub>4</sub>H]<sup>+</sup> calcd for C<sub>13</sub>H<sub>14</sub>ClN<sub>2</sub>O<sub>3</sub><sup>+</sup> 281.0687, found 281.0695.

### (Z)-1-bromo-2-(2-chloro-2-nitrovinyl)benzene (**2b**).

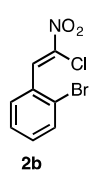

This compound was isolated as a pale yellow solid (3.2 g, 75%); **mp** = 50-51 °C; **R<sub>f</sub>** = 0.75 (ethyl acetate/petroleum ether 1:9); <sup>1</sup>H NMR (400 MHz, CDCl<sub>3</sub>)  $\delta$  8.62 (1H, s, CH), 7.90 (1H, dd, *J* = 7.9, 1.8 Hz, ArH), 7.71 (1H, dd, *J* = 7.9, 1.4 Hz, ArH), 7.44 (1H, ddd, *J* = 7.7, 7.7, 1.4 Hz, ArH), 7.35 (1H, ddd, *J* = 7.7, 7.7, 1.6 Hz, ArH). <sup>13</sup>C NMR (100 MHz, CDCl<sub>3</sub>)  $\delta$  139.9, 136.1, 135.6, 132.6, 130.9, 130.7, 127.8, 126.3. **HRMS** (ESI<sup>+</sup>): [M+Ag]<sup>+</sup> calcd for C<sub>8</sub>H<sub>5</sub>BrClNO<sub>2</sub>Ag<sup>+</sup> 367.8238, found 367.8239.

**(Z)-1-(2-chloro-2-nitrovinyl)-2-iodobenzene (2d).**

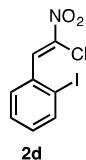

This compound was isolated as a viscous yellow oil (4.0 g, 80%); **R<sub>f</sub>** = 0.65 (ethyl acetate/petroleum ether 1:9); **<sup>1</sup>H NMR** (400 MHz, CDCl<sub>3</sub>) δ 8.48 (1H, s, CH), 7.98 (1H, dd, *J* = 8.0, 1.1 Hz, ArH), 7.80 (1H, dd, *J* = 8.0, 1.7 Hz, ArH), 7.48 (1H, ddd, *J* = 8.0, 7.3, 1.1 Hz, ArH), 7.17 (1H, ddd, *J* = 8.0, 7.3, 1.7 Hz, ArH). **<sup>13</sup>C NMR** (100 MHz, CDCl<sub>3</sub>) δ 140.3, 140.1, 135.3, 134.2, 132.4, 130.4, 128.6, 101.6. **HRMS** (ESI<sup>+</sup>): [M+Ag]<sup>+</sup> calcd for C<sub>8</sub>H<sub>5</sub>NO<sub>2</sub>IClAg<sup>+</sup> 415.8099, found 415.8110.

**(Z)-1-(2-chloro-2-nitrovinyl)-2-(trifluoromethyl)benzene (2h).**

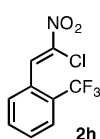

This compound was isolated as a pale yellow oil (3.04 g, 69%); **R<sub>f</sub>** = 0.70 (ethyl acetate/petroleum ether 1:9); **<sup>1</sup>H NMR** (300 MHz, CDCl<sub>3</sub>) δ 8.59 (s, 1H), 7.82 (dd, *J* = 13.7, 7.8 Hz, 2H), 7.69 (t, *J* = 7.4 Hz, 1H), 7.60 (t, *J* = 7.6 Hz, 1H). **<sup>13</sup>C NMR** (100 MHz, CDCl<sub>3</sub>) δ 141.0, 134.3, 132.3, 130.7, 130.4, 128.7, 128.5, 126.7 (q, *J* = 5.5 Hz), 123.5 (q, *J* = 273 Hz). **HRMS** (ESI<sup>+</sup>): [M+Ag]<sup>+</sup> calcd for C<sub>9</sub>H<sub>5</sub>NO<sub>2</sub>ClF<sub>3</sub>Ag<sup>+</sup> 357.9006, found 357.9006.

**(Z)-2-(2-chloro-2-nitrovinyl)phenyldiphenylphosphine oxide (2i).**

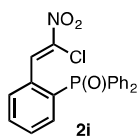

This compound was isolated as a pale yellow solid (2.2 g, 58%); **R<sub>f</sub>** = 0.34 (ethyl acetate/petroleum ether 1:1); **<sup>1</sup>H NMR** (400 MHz, CDCl<sub>3</sub>) δ 8.9 (1H, s, CH), 7.79 (1H, dd, *J* = 7.5, 4.1 Hz, ArH), 7.73-7.60 (5H, m, ArH), 7.59-7.53 (1H, m, ArH), 7.53-7.40 (5H, m, ArH), 7.32 (1H, ddd, *J* = 13.6, 7.78, 1.4 Hz, ArH). **<sup>13</sup>C NMR** (100 MHz, CDCl<sub>3</sub>) δ 139.5, 134.8 (d, *J* = 6.5 Hz), 133.0 (d, *J* = 99.0 Hz), 133.7 (d, *J* = 10.8 Hz), 133.5, 132.6 (d, *J* = 2.7 Hz), 132.3 (d, *J* = 1.9 Hz), 132.2, 132.1 (d, *J* = 9.8 Hz), 131.4 (d, *J* = 5.4 Hz), 131.2, 130.6 (d, *J* = 8.9 Hz), 129.9 (d, *J* = 12.1 Hz), 129.0 (d, *J* = 12.1 Hz). **HRMS** (ESI<sup>+</sup>): [M+Ag]<sup>+</sup> calcd for C<sub>20</sub>H<sub>15</sub>NO<sub>3</sub>PClAg<sup>+</sup> 489.9524, found 489.9528.

### 3. General procedure for the enantioselective synthesis of dihydrofurans 3a-e

Catalyst **6** was synthesized according to literature procedure.<sup>3</sup> Racemic samples were synthesized according to the following procedure.<sup>4</sup>

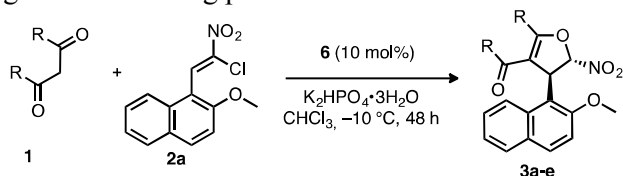

A solution of the corresponding α-chloronitroalkenes (0.28 mmol, 1.0 equiv) and catalyst **6** (10 mol %) in CHCl<sub>3</sub> (0.03 M, 9 mL) was cooled at 0 °C. Then, diketone derivate (0.36 mmol, 1.3 equiv) and K<sub>2</sub>HPO<sub>4</sub> (0.42 mmol, 1.5 equiv) were added sequentially. The reaction mixture was stirred at same temperature for 48 hours. When the reaction was complete as

indicated by TLC analysis, the crude product was directly purified by means of flash silica gel column chromatography.

**(2*S*,3*S*)-3-(2-methoxynaphthalen-1-yl)-6,6-dimethyl-2-nitro-3,5,6,7-tetrahydro-benzofuran-4(2*H*)-one (3a).**

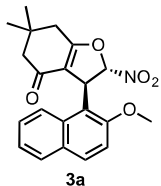

This compound was isolated as a pale yellow solid (94 mg, 92%); **mp** = 154-155 °C; **R<sub>f</sub>** = 0.35 (ethyl acetate/petroleum ether 3:7); **dr** (*trans/cis*) > 20:1; **HPLC** (Ulmo (S,S), Heptane/ethanol = 80/20, flow rate = 1.0 mL/min,  $\lambda$  = 254 nm):  $t_{\text{major}}$  = 7.46 min,  $t_{\text{minor}}$  = 9.38 min, ee = 99%;  $[\alpha]_{\text{D}}^{25}$  (CHCl<sub>3</sub>,  $c$  = 1.0) = +465; **<sup>1</sup>H NMR** (400 MHz, CDCl<sub>3</sub>)  $\delta$  8.17 (1H, brs, ArH), 7.85 (1H, d,  $J$  = 9.0 Hz, ArH), 7.80 (1H, d,  $J$  = 8.1 Hz, ArH), 7.56 (1H, brs, ArH), 7.39 (1H, dd,  $J$  = 9.0, 7.6 Hz, ArH), 7.24 (1H, brs, ArH), 6.29 (1H, d,  $J$  = 2.9 Hz, CH), 5.46 (1H, brs, CH), 3.90 (3H, s, CH<sub>3</sub>), 2.72-2.47 (2H, m), 2.25 (1H, d,  $J$  = 16.4 Hz, CH), 2.13 (1H, d,  $J$  = 16.4 Hz, CH), 1.19 (3H, s, CH<sub>3</sub>), 1.11 (3H, s, CH<sub>3</sub>). **<sup>13</sup>C NMR** (100 MHz, CDCl<sub>3</sub>)  $\delta$  193.0, 174.3, 155.3, 132.8, 130.8, 129.5, 128.8, 127.6, 123.9, 122.6, 117.6, 113.8, 112.6, 111.7, 56.0, 51.4, 45.9, 37.4, 34.7, 29.2, 28.0. **HRMS** (ESI<sup>+</sup>):  $[M+H]^+$  calcd for C<sub>21</sub>H<sub>22</sub>NO<sub>5</sub><sup>+</sup> 368.1492, found 368.1492.

Method description : Ulmo (S,S), Heptane/Ethanol 80/20, 1 ml/min, UV 254 nm et polarimetre

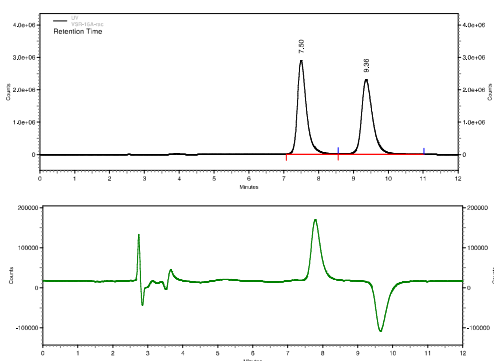

| Retention Time | Area     | Area % | Capacity Factor | Resolution (USP) |
|----------------|----------|--------|-----------------|------------------|
| 7.50           | 52704322 | 50.63  | 1.50            | 0.00             |
| 9.36           | 51393828 | 49.37  | 2.12            | 3.64             |

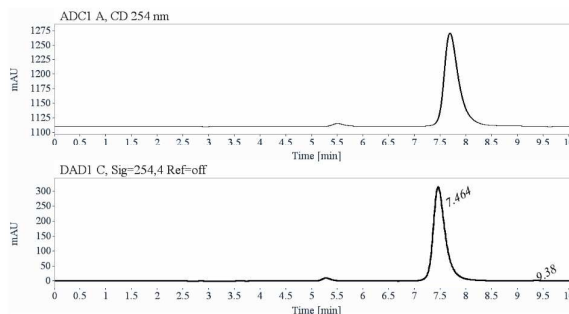

Signal: DAD1 C, Sig=254.4 Ref=off

| RT [min] | Area | Area%  | Capacity Factor | Enantioselectivity | Resolution (USP) |
|----------|------|--------|-----------------|--------------------|------------------|
| 7.46     | 5402 | 99.03  | 1.53            |                    |                  |
| 9.38     | 53   | 0.97   | 2.18            | 1.42               | 3.47             |
| Sum      | 5455 | 100.00 |                 |                    |                  |

**(2*S*,3*S*)-3-(2-methoxynaphthalen-1-yl)-2-nitro-3,5,6,7-tetrahydrobenzofuran-4(2*H*)-one (3b).**

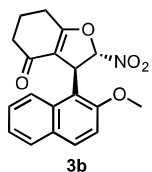

This compound was isolated as a white solid (88 mg, 92%); **mp** = 163-165 °C; **R<sub>f</sub>** = 0.35 (ethyl acetate/petroleum ether 3:7); **dr** (*trans/cis*) > 20:1; **HPLC** (Lux-Cellulose-4, Heptane/ethanol = 50/50, flow rate = 1.0 mL/min,  $\lambda$  = 254 nm):  $t_{\text{major}}$  = 6.68 min,  $t_{\text{minor}}$  = 9.41 min, ee = 96%;  $[\alpha]_{\text{D}}^{25}$  (CHCl<sub>3</sub>,  $c$  = 1.0) = +489; **<sup>1</sup>H NMR** (400 MHz, CDCl<sub>3</sub>)  $\delta$  8.17 (1H, brs, ArH), 7.84 (1H, d,  $J$  = 9.1 Hz, ArH), 7.80 (1H, d,  $J$  = 8.2 Hz, ArH), 7.56 (1H, brs, ArH), 7.39 (1H, dd,  $J$  = 7.6, 7.6 Hz, ArH), 7.28-7.22 (1H, m, ArH), 6.27 (1H, d,  $J$  = 3.5 Hz, CH), 5.49 (1H, brs, CH), 3.90 (3H, s, CH<sub>3</sub>), 2.83-2.65 (2H, m), 2.37-2.03 (4H, m). **<sup>13</sup>C NMR** (100 MHz, CDCl<sub>3</sub>)  $\delta$  193.5, 175.1, 155.6, 132.7, 130.8, 129.6, 128.9, 127.6, 124.0, 122.6, 117.9, 115.3, 113.3, 111.4, 56.5, 45.9, 37.0, 23.6, 21.8. **HRMS** (ESI<sup>+</sup>):  $[M+H]^+$  calcd for C<sub>19</sub>H<sub>18</sub>NO<sub>5</sub><sup>+</sup> 340.1179, found 340.1179.

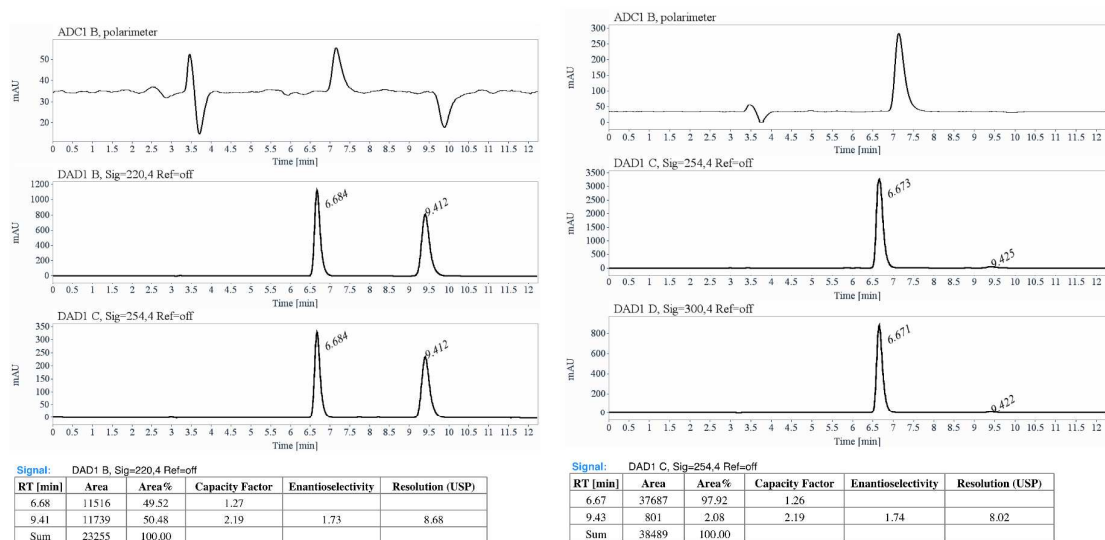

**(2*S*,3*S*)-3-(2-methoxynaphthalen-1-yl)-6-methyl-2-nitro-2,3-dihydro-4*H*-furo[3,2-*c*]pyran-4-one (3c).**

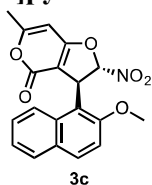

This compound was isolated as a white solid (92 mg, 93%); **mp** = 156-157 °C; **R<sub>f</sub>** = 0.37 (ethyl acetate/petroleum ether 1:1); **dr** (*trans/cis*) > 20:1; **HPLC** (Lux-Cellulose-4, Heptane/ethanol = 50/50, flow rate = 1.0 mL/min, λ = 254 nm): *t*<sub>major</sub> = 6.13 min, *t*<sub>minor</sub> = 9.36 min, *ee* = 94%; [α]<sub>D</sub><sup>25</sup> (CHCl<sub>3</sub>, *c* = 1.0) = +381; **<sup>1</sup>H NMR** (400 MHz, CDCl<sub>3</sub>) δ 8.16 (1H, brs, ArH), 7.88 (1H, d, *J* = 9.0 Hz, ArH), 7.82 (1H, d, *J* = 8.3 Hz, ArH), 7.58 (1H, brs, ArH), 7.40 (1H, dd, *J* = 7.8, 6.6 Hz, ArH), 7.24 (1H, d, *J* = 9.0 Hz, ArH), 6.38 (1H, d, *J* = 3.3 Hz, CH), 6.23 (1H, s, CH), 5.62 (1H, brs, CH), 3.83 (3H, s, CH<sub>3</sub>), 2.31 (3H, s, CH<sub>3</sub>). **<sup>13</sup>C NMR** (100 MHz, CDCl<sub>3</sub>) δ 169.9, 167.2, 159.6, 155.6, 132.8, 131.3, 129.5, 129.0, 127.9, 124.1, 122.2, 116.6, 113.0, 111.9, 101.3, 95.0, 56.3, 45.4, 20.7. **HRMS** (ESI<sup>+</sup>): [M+H]<sup>+</sup> calcd for C<sub>19</sub>H<sub>16</sub>NO<sub>6</sub><sup>+</sup> 354.0972, found 354.0977.

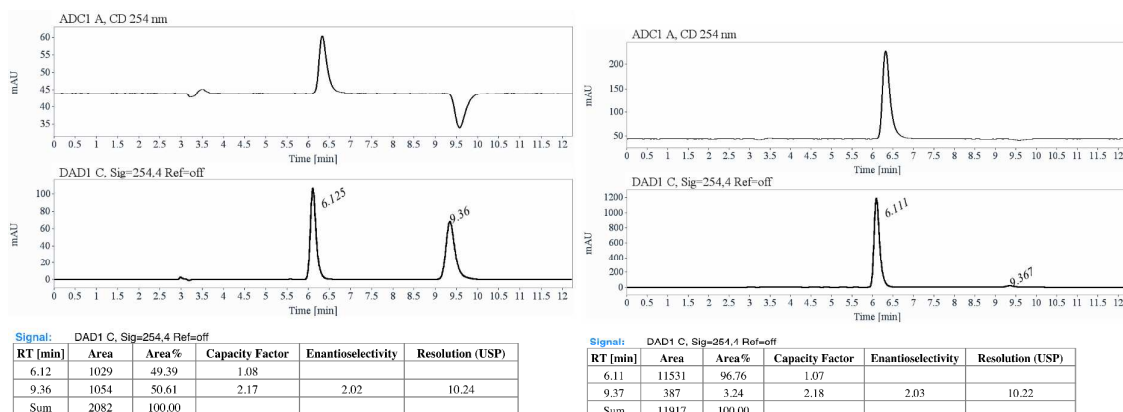

**(2*S*,3*S*)-3-(2-methoxynaphthalen-1-yl)-2-nitro-2,3-dihydro-4*H*-furo[3,2-*c*]chromen-4-one (3d).**

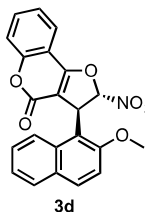

This compound was isolated as a white solid (102 mg, 94%); **mp** = 210-215 °C; **R<sub>f</sub>** = 0.65 (ethyl acetate/petroleum ether 3:7); **dr** (*trans/cis*) > 20:1; **HPLC** (Lux-Cellulose-4, Heptane/ethanol = 50/50, flow rate = 1.0 mL/min, λ

= 254 nm):  $t_{\text{major}} = 7.01$  min,  $t_{\text{minor}} = 9.18$  min, ee = 94%;  $[\alpha]_{\text{D}}^{25}$  ( $\text{CHCl}_3$ ,  $c = 1.0$ ) = +499;  $^1\text{H}$  NMR (400 MHz,  $\text{DMSO}-d_6$ )  $\delta$  8.40 (1H, d,  $J = 9.1$  Hz, ArH), 8.02 (1H, d,  $J = 9.1$  Hz, ArH), 7.99-7.93 (2H, m, ArH), 7.81-7.76 (1H, m, ArH), 7.62 (1H, dd,  $J = 9.1$ , 7.1 Hz, ArH), 7.56-7.51 (2H, m, ArH), 7.49-7.43 (2H, m, ArH), 7.09 (1H, d,  $J = 3.5$  Hz, CH), 6.10 (1H, d,  $J = 3.5$  Hz, CH), 3.72 (3H, s,  $\text{CH}_3$ ).  $^{13}\text{C}$  NMR (100 MHz,  $\text{DMSO}-d_6$ )  $\delta$  164.2, 157.2, 155.9, 154.4, 133.5, 132.6, 130.6, 128.8, 128.5, 127.2, 125.0, 123.7, 122.9, 122.5, 117.0, 114.0, 111.6, 111.0, 104.5, 56.5, 44.8. HRMS (ESI<sup>+</sup>):  $[\text{M}+\text{H}]^+$  calcd for  $\text{C}_{22}\text{H}_{16}\text{NO}_6^+$  390.0972, found 390.0969.

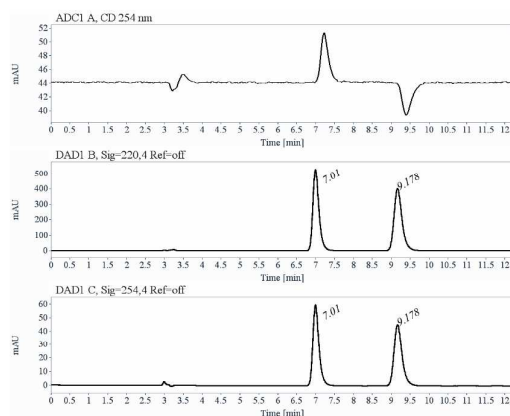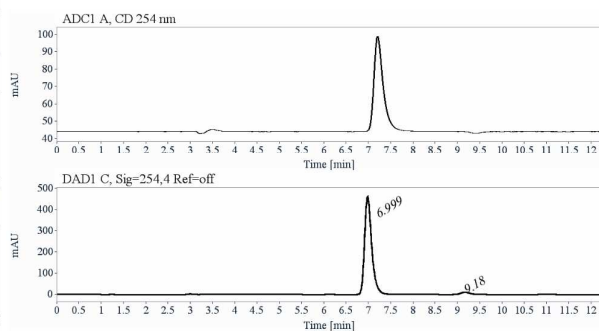

**(2*S*,3*S*)-3-(2-methoxynaphthalen-1-yl)-5-methyl-2-nitro-3,5-dihydrofuro[3,2-*c*]quinolin-4(2*H*)-one (3e).**

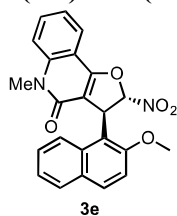

This compound was isolated as a white solid (100 mg, 89%); mp = 210-215 °C; **R<sub>f</sub>** = 0.50 (ethyl acetate/petroleum ether 1:1); **dr** (*trans/cis*) > 20:1; **HPLC** (Lux-Cellulose-4, Heptane/ethanol = 50/50, flow rate = 1.0 mL/min,  $\lambda = 254$  nm):  $t_{\text{major}} = 6.20$  min,  $t_{\text{minor}} = 7.82$  min, ee = 95%;  $[\alpha]_{\text{D}}^{25}$  ( $\text{CHCl}_3$ ,  $c = 1.0$ ) = +520;  $^1\text{H}$  NMR (400 MHz,  $\text{DMSO}-d_6$ )  $\delta$  8.43 (1H, d,  $J = 9.0$  Hz, ArH), 8.01-7.91 (3H, m, ArH), 7.79-7.73 (1H, m, ArH), 7.64-7.57 (2H, m, ArH), 7.48-7.40 (3H, m, ArH), 7.56-7.51 (2H, m, ArH), 7.49-7.43 (2H, m, ArH), 6.95 (1H, d,  $J = 3.1$  Hz, CH), 5.97 (1H, d,  $J = 3.1$  Hz, CH), 3.66 (3H, s,  $\text{CH}_3$ ), 3.48 (3H, s,  $\text{CH}_3$ ).  $^{13}\text{C}$  NMR (100 MHz,  $\text{DMSO}-d_6$ )  $\delta$  160.3, 158.2, 155.7, 140.4, 132.7, 131.9, 130.2, 128.8, 128.3, 126.9, 123.5, 123.4, 122.3, 118.2, 115.5, 114.1, 111.7, 110.6, 109.3, 56.4, 46.2, 30.7, 28.6. HRMS (ESI<sup>+</sup>):  $[\text{M}+\text{H}]^+$  calcd for  $\text{C}_{23}\text{H}_{19}\text{N}_2\text{O}_5^+$  403.1288, found 403.1288.

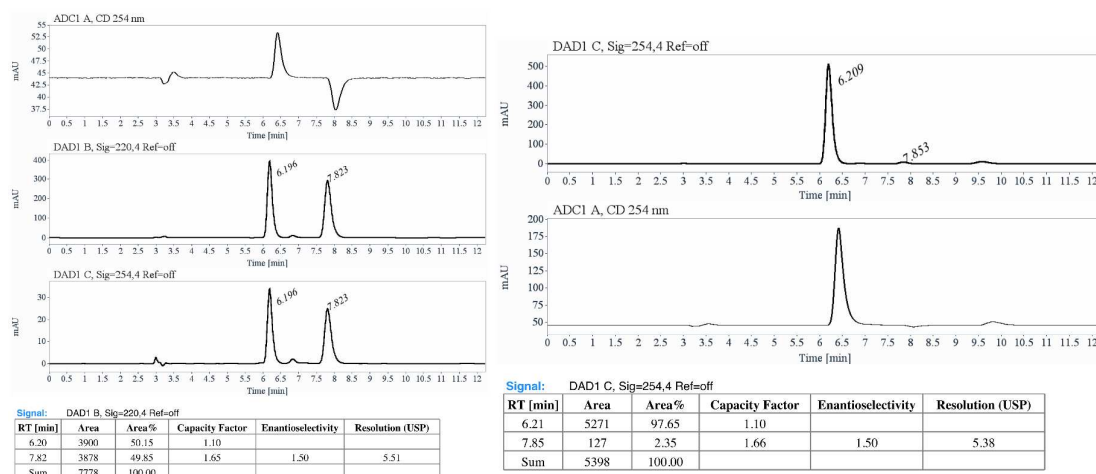

## 4. General procedure for the oxidation of dihydrofuran 3a-e to furan atropisomers 4a-e

Optimization of the reaction conditions

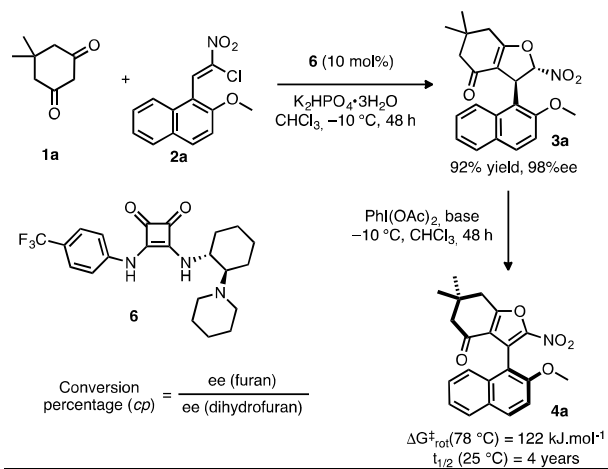

| Entry | Base                            | Yield of 4a <sup>a</sup> | ee (%) of 4a <sup>b</sup> | cp (%) |
|-------|---------------------------------|--------------------------|---------------------------|--------|
| 1     | Et <sub>3</sub> N               | 60                       | 40                        | 42     |
| 2     | DMAP                            | 62                       | 55                        | 58     |
| 3     | K <sub>3</sub> PO <sub>4</sub>  | 56                       | 87                        | 91     |
| 4     | Cs <sub>2</sub> CO <sub>3</sub> | 72                       | 89                        | 94     |

<sup>a</sup>Isolated yield after column chromatography. <sup>b</sup>Determined by HPLC analysis on chiral stationary phase.

### General procedure

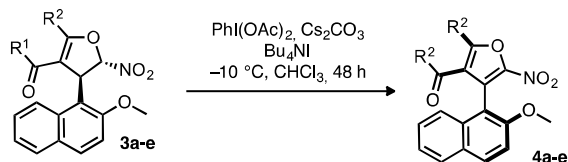

The mixture of enantioenriched 2,3-dihydrofuran **3a-3e** (0.27 mmol, 1.0 equiv), PhI(OAc)<sub>2</sub> (210 mg, 0.65 mmol, 2.4 equiv), and Cs<sub>2</sub>CO<sub>3</sub> (132 mg, 0.41 mmol, 1.6 equiv) in CHCl<sub>3</sub> (6

mL) was treated with Bu<sub>4</sub>NI (120 mg, 0.32 mmol, 1.2 equiv) at −5 °C. The reaction was allowed to stir at same temperature for 48 h. Upon completion as shown by TLC, the reaction mixture was washed with saturated Na<sub>2</sub>S<sub>2</sub>O<sub>3</sub> (20 mL) and extracted using dichloromethane (3 x 5 mL). The organic layer was dried over Na<sub>2</sub>SO<sub>4</sub> and concentrated *in vacuo*. The residue was purified by column chromatography on silica gel (MeOH/CH<sub>2</sub>Cl<sub>2</sub>) to provide corresponding furan **4a-e**.

**(aS)-3-(2-methoxynaphthalen-1-yl)-6,6-dimethyl-2-nitro-6,7-dihydrobenzofuran-4(5H)-one (4a)**

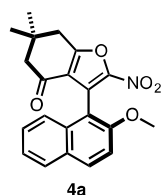

This compound was isolated as an orange solid (71 mg, 72%); **mp** = 165-166 °C; **R<sub>f</sub>** = 0.34 (ethyl acetate/petroleum ether 3:7); **HPLC** (Chiralpak IC, Heptane/ethanol = 70/30, flow rate = 1.0 mL/min, λ = 254 nm): *t*<sub>major</sub> = 6.81 min, *t*<sub>minor</sub> = 9.54 min, ee = 85%; **Chirality conversion percentage** = 94%; [α]<sub>D</sub><sup>25</sup> (CHCl<sub>3</sub>, *c* = 1.0) = −60; **<sup>1</sup>H NMR** (400 MHz, CDCl<sub>3</sub>) δ 7.97 (1H, d, *J* = 9.1 Hz, ArH), 7.84 (1H, dd, *J* = 7.6, 1.8 Hz, ArH), 7.40-7.28 (4H, m, ArH), 3.84 (3H, s, OCH<sub>3</sub>), 2.95 (2H, d, *J* = 1.0 Hz, CH<sub>2</sub>), 2.40 (2H, s, CH<sub>2</sub>), 1.22 (3H, s, CH<sub>3</sub>), 1.21 (3H, s, CH<sub>3</sub>). **<sup>13</sup>C NMR** (100 MHz, CDCl<sub>3</sub>) δ 191.5, 165.9, 155.0, 149.2, 132.1, 131.6, 128.8, 128.7, 127.3, 123.9, 123.5, 122.0, 119.8, 112.8, 110.7, 56.5, 52.6, 37.6, 35.0, 28.7, 28.6. **HRMS** (ESI<sup>+</sup>): [M+H]<sup>+</sup> calcd for C<sub>21</sub>H<sub>19</sub>NO<sub>5</sub><sup>+</sup> 366.1336, found 366.1338.

Method description : Chiralpak IC, Heptane/Ethanol 70/30, 1 ml/min, DAD

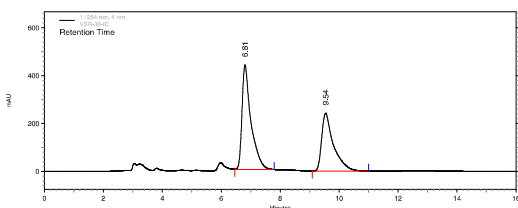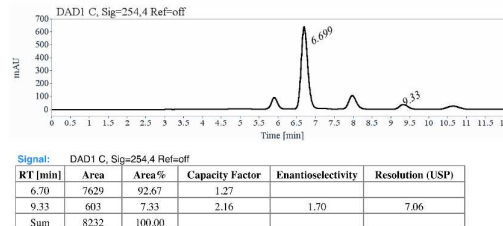

**(aS)-3-(2-methoxynaphthalen-1-yl)-2-nitro-6,7-dihydrobenzofuran-4(5H)-one (4b)**

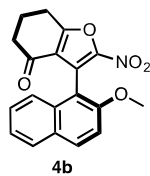

This compound was isolated as a yellow solid (46 mg, 51%); **mp** = 203-204 °C; **R<sub>f</sub>** = 0.35 (ethyl acetate/petroleum ether 3:7); **HPLC** (Lux-Cellulose-2, Heptane/ethanol = 50/50, flow rate = 1.0 mL/min, λ = 254 nm): *t*<sub>major</sub> = 8.35 min, *t*<sub>minor</sub> = 11.93 min, ee = 86%; **Chirality conversion percentage** = 90%; [α]<sub>D</sub><sup>25</sup> (CHCl<sub>3</sub>, *c* = 1.0) = −20; **<sup>1</sup>H NMR** (400 MHz, CDCl<sub>3</sub>) δ 7.97 (1H, d, *J* = 9.1 Hz, ArH), 7.85-7.82 (1H, m, ArH), 7.38-7.28 (4H, m, ArH), 3.85 (3H, s, OCH<sub>3</sub>), 3.11 (2H, t, *J* = 6.3 Hz, CH<sub>2</sub>), 2.52 (2H, dd, *J* = 7.4, 5.1 Hz, CH<sub>2</sub>), 2.30 (2H, pent, *J* = 6.3, CH<sub>2</sub>). **<sup>13</sup>C NMR** (100 MHz, CDCl<sub>3</sub>) δ 191.8, 166.8, 155.0, 132.2, 131.7, 128.9, 128.7, 127.3, 123.9, 123.5, 123.0, 119.9, 112.9, 110.8, 56.6, 38.4, 23.9, 21.9. **HRMS** (ESI<sup>+</sup>): [M+H]<sup>+</sup> calcd for C<sub>19</sub>H<sub>16</sub>NO<sub>5</sub><sup>+</sup> 338.1023, found 338.1023.

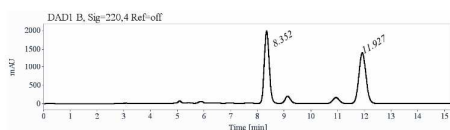

Signal: DAD1 B, Sig=220.4 Ref=off

| RT [min] | Area  | Area%  | Capacity Factor | Enantioselectivity | Resolution (USP) |
|----------|-------|--------|-----------------|--------------------|------------------|
| 8.35     | 25450 | 49.58  | 1.83            |                    |                  |
| 11.93    | 25879 | 50.42  | 3.04            | 1.66               | 8.73             |
| Sum      | 51329 | 100.00 |                 |                    |                  |

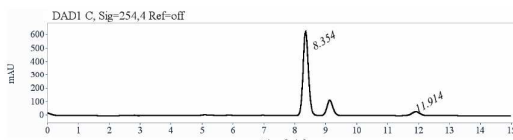

Signal: DAD1 C, Sig=254.4 Ref=off

| RT [min] | Area | Area%  | Capacity Factor | Enantioselectivity | Resolution (USP) |
|----------|------|--------|-----------------|--------------------|------------------|
| 8.35     | 7490 | 93.01  | 1.83            |                    |                  |
| 11.91    | 563  | 6.99   | 3.04            | 1.66               | 8.80             |
| Sum      | 8053 | 100.00 |                 |                    |                  |

**(*aS*)-3-(2-methoxynaphthalen-1-yl)-6-methyl-2-nitro-4H-furo[3,2-*c*]pyran-4-one (4c)**

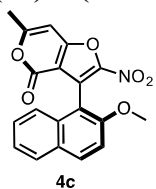

This compound was isolated as a yellow solid (76 mg, 80%); **mp** = 227-229 °C; **R<sub>f</sub>** = 0.45 (ethyl acetate/petroleum ether 3:7); **HPLC** (Chiralpak AZ-H, Heptane/ethanol = 50/50, flow rate = 1.0 mL/min, λ = 254 nm): *t*<sub>major</sub> = 7.31 min, *t*<sub>minor</sub> = 8.20 min, ee = 87%; **Chirality conversion percentage** = 92%; [ $\alpha$ ]<sub>D</sub><sup>25</sup> (CHCl<sub>3</sub>, *c* = 1.0) = -158; <sup>1</sup>**H NMR** (400 MHz, CDCl<sub>3</sub>) δ 8.01 (1H, d, *J* = 9.1 Hz, ArH), 7.86 (1H, dd, *J* = 7.72, 1.76 Hz, ArH), 7.43-7.31 (4H, m, ArH), 6.54 (1H, s, CH), 3.90 (3H, s, OCH<sub>3</sub>), 2.39 (3H, s, CH<sub>3</sub>). <sup>13</sup>**C NMR** (100 MHz, CDCl<sub>3</sub>) δ 165.9, 160.6, 156.7, 155.4, 148.5, 132.4, 132.0, 128.9, 127.7, 124.2, 123.3, 121.2, 112.8, 110.3, 109.3, 95.1, 56.6, 29.9, 21.0. **HRMS** (ESI<sup>+</sup>): [M+H]<sup>+</sup> calcd for C<sub>19</sub>H<sub>14</sub>NO<sub>6</sub><sup>+</sup> 352.0816, found 352.0815.

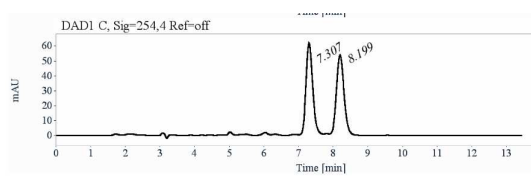

| Signal: DAD1 B, Sig=220.4 Ref=off |       |        |                 |                    |                  |
|-----------------------------------|-------|--------|-----------------|--------------------|------------------|
| RT [min]                          | Area  | Area%  | Capacity Factor | Enantioselectivity | Resolution (USP) |
| 7.31                              | 5642  | 50.51  | 1.48            |                    |                  |
| 8.20                              | 5529  | 49.49  | 1.78            | 1.20               | 2.38             |
| Sum                               | 11171 | 100.00 |                 |                    |                  |

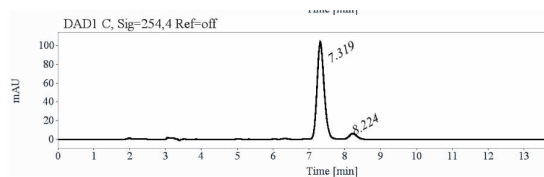

| Signal: DAD1 C, Sig=254.4 Ref=off |       |        |                 |                    |                  |
|-----------------------------------|-------|--------|-----------------|--------------------|------------------|
| RT [min]                          | Area  | Area%  | Capacity Factor | Enantioselectivity | Resolution (USP) |
| 7.32                              | 9748  | 93.71  | 1.48            |                    |                  |
| 8.22                              | 654   | 6.29   | 1.79            | 1.21               | 2.33             |
| Sum                               | 10403 | 100.00 |                 |                    |                  |

**(*aS*)-3-(2-methoxynaphthalen-1-yl)-2-nitro-4H-furo[3,2-*c*]chromen-4-one (4d)**

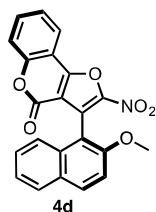

This compound was isolated as an orange solid (91 mg, 87%); **mp** = 227-229 °C; **R<sub>f</sub>** = 0.72 (ethyl acetate/petroleum ether 3:7); **HPLC** (Lux-Cellulose-2, Heptane/ethanol = 50/50, flow rate = 1.0 mL/min, λ = 254 nm): *t*<sub>major</sub> = 12.54 min, *t*<sub>minor</sub> = 13.97 min, ee = 79%; **Chirality conversion percentage** = 81%; [ $\alpha$ ]<sub>D</sub><sup>25</sup> (CHCl<sub>3</sub>, *c* = 1.0) = -174; <sup>1</sup>**H NMR** (400 MHz, CD<sub>2</sub>Cl<sub>2</sub>) δ 8.15 (1H, td, *J* = 7.3, 1.6 Hz, ArH), 8.10 (1H, dd, *J* = 8.8, 1.8 Hz, ArH), 7.96-7.91 (1H, m, ArH), 7.76-7.70 (1H, m, ArH), 7.55-7.39 (6H, m, ArH), 3.90 (3H, s, OCH<sub>3</sub>), 2.39 (3H, s, CH<sub>3</sub>). <sup>13</sup>**C NMR** (100 MHz, CD<sub>2</sub>Cl<sub>2</sub>) δ 142.7, 141.4, 141.3, 140.4, 135.5, 119.7, 118.1, 117.9, 114.7, 114.6, 113.6, 111.4, 110.1, 109.2, 108.2, 107.5, 103.7, 98.8, 98.4, 97.2, 95.2, 42.5. **HRMS** (ESI<sup>+</sup>): [M+H]<sup>+</sup> calcd for C<sub>22</sub>H<sub>14</sub>NO<sub>6</sub><sup>+</sup> 388.0816, found 388.0818.

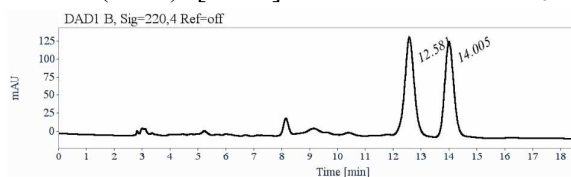

| Signal: DAD1 B, Sig=220.4 Ref=off |      |        |                 |                    |                  |
|-----------------------------------|------|--------|-----------------|--------------------|------------------|
| RT [min]                          | Area | Area%  | Capacity Factor | Enantioselectivity | Resolution (USP) |
| 12.58                             | 3205 | 51.69  | 3.26            |                    |                  |
| 14.00                             | 2996 | 48.31  | 3.75            | 1.15               | 2.39             |
| Sum                               | 6201 | 100.00 |                 |                    |                  |

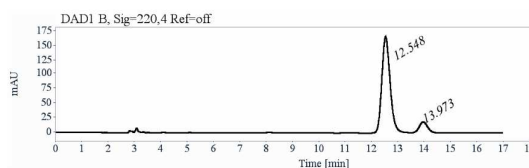

| Signal: DAD1 B, Sig=220.4 Ref=off |      |        |                 |                    |                  |
|-----------------------------------|------|--------|-----------------|--------------------|------------------|
| RT [min]                          | Area | Area%  | Capacity Factor | Enantioselectivity | Resolution (USP) |
| 12.55                             | 3636 | 89.36  | 3.25            |                    |                  |
| 13.97                             | 433  | 10.64  | 3.74            | 1.15               | 2.47             |
| Sum                               | 4068 | 100.00 |                 |                    |                  |

**(*aS*)-3-(2-methoxynaphthalen-1-yl)-5-methyl-2-nitrofuro[3,2-*c*]quinolin-4(5*H*)-one (4e)**

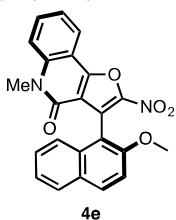

This compound was isolated as an orange solid (75 mg, 69%). This product proved to be very insoluble in most organic solvents; **mp** = 312-314 °C; **R<sub>f</sub>** = 0.50 (ethyl acetate/petroleum ether 1:1); **HPLC** (Chiralpak IB, Heptane/ethanol/chloroform = 50/40/10, flow rate = 1.0 mL/min, λ = 254

nm):  $t_{\text{major}} = 5.72$  min,  $t_{\text{minor}} = 6.96$  min, ee = 86%; **Chirality conversion percentage** = 90%;  $[\alpha]_{\text{D}}^{25}$  ( $\text{CHCl}_3$ ,  $c = 1.0$ ) = +9;  $^1\text{H NMR}$  (400 MHz,  $\text{DMSO}-d_6$ )  $\delta$  8.21 (1H, d,  $J = 7.9$ , ArH), 8.12 (1H, d,  $J = 9.0$  Hz, ArH), 7.96 (1H, d,  $J = 7.8$  Hz, ArH), 7.84 (1H, ddd,  $J = 8.7$ , 7.8, 1.1 Hz, ArH), 7.72 (1H, d,  $J = 8.6$  Hz, ArH), 7.58 (1H, d,  $J = 9.2$  Hz, ArH), 7.55-7.49 (2H, m, ArH), 7.41-7.32 (2H, m, ArH), 3.81 (3H, s,  $\text{OCH}_3$ ), 3.56 (3H, s,  $\text{CH}_3$ ). **HRMS** (ESI+):  $[\text{M}+\text{H}]^+$  calcd for  $\text{C}_{23}\text{H}_{17}\text{N}_2\text{O}_5^+$  401.1132, found 401.1132.

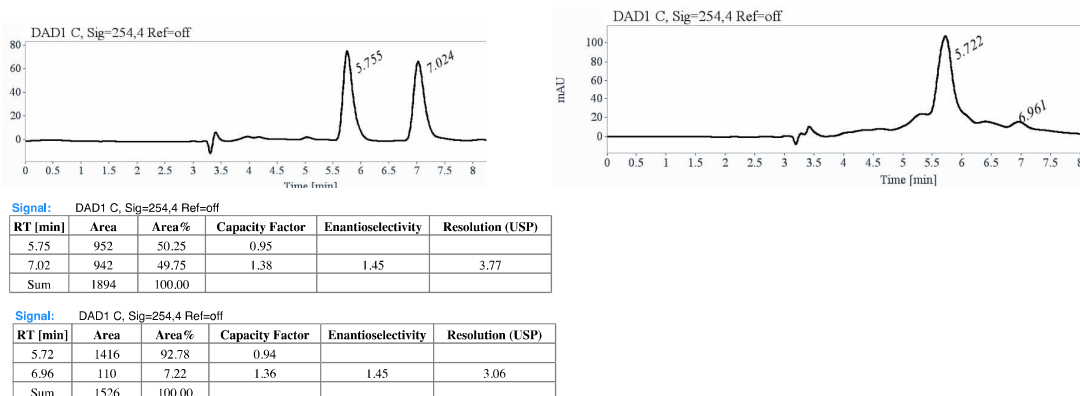

## 5. General procedure for the enantioselective synthesis of dihydrofurans 10a-10m

The synthesis of racemic dihydrofuran was accomplished using the following procedure: Triethylamine (2.0 equiv) was added to a solution of chloronitroalkene **2** (1.0 equiv) and 2-naphthol derivative **5** (1.2 equiv) in chloroform ( $C = 0.1 \text{ mol.L}^{-1}$ ). The reaction was stirred at room temperature until TLC showed consumption of starting materials. Purification by flash column chromatography affords the desired product.

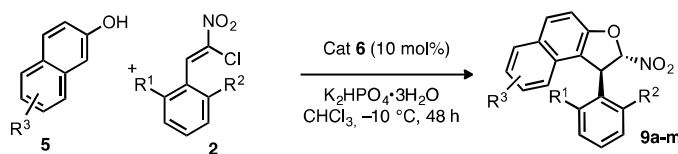

A solution of the corresponding  $\alpha$ -chloronitroalkenes (0.38 mmol, 1.0 equiv) and catalyst **6** (10 mol %) in  $\text{CHCl}_3$  (0.1 M, 4 mL) was cooled at  $0^\circ\text{C}$ . Then, 2-naphthol derivative (0.49 mmol, 1.3 equiv) and  $\text{K}_2\text{HPO}_4$  (0.95 mmol, 2.5 equiv) were added sequentially. The reaction mixture was stirred at same temperature for 48-72 hours. When the reaction was complete as indicated by TLC analysis, the crude product was directly purified by flash column chromatography on silica gel.

### (1R,2S)-1-(2-bromophenyl)-2-nitro-1,2-dihydronaphtho[2,1-b]furan (**9a**)

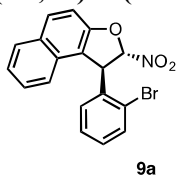

This compound was isolated as a white solid (105 mg, 75%); **mp** = 115-117  $^\circ\text{C}$ ; **R<sub>f</sub>** = 0.42 (ethyl acetate/petroleum ether 1:9); **dr** (*trans/cis*) > 20:1; **HPLC** (Lux-Cellulose 2, Heptane/ethanol = 90/10, flow rate = 1.0 mL/min,  $\lambda = 254$  nm):  $t_{\text{major}} = 6.52$  min,  $t_{\text{minor}} = 6.06$  min, ee = 97%;  $[\alpha]_{\text{D}}^{25}$  ( $\text{CHCl}_3$ ,  $c = 1.0$ ) = +201;  $^1\text{H NMR}$  (400 MHz,  $\text{CDCl}_3$ )  $\delta$  7.94 (1H, d,  $J = 8.8$  Hz,

ArH), 7.91-7.87 (1H, m, ArH), 7.73 (1H, dd,  $J = 7.9, 1.5$  Hz, ArH), 7.46 (1H, d,  $J = 8.8$  Hz, ArH), 7.42-7.34 (3H, m, ArH), 7.17 (1H, ddd,  $J = 7.6, 7.6, 2.2$  Hz, ArH), 7.14-7.08 (1H, m, ArH), 6.63 (1H, brd,  $J = 6.5$  Hz, ArH), 6.11 (1H, s, CH), 5.91 (1H, s, CH).  $^{13}\text{C}$  NMR (100 MHz,  $\text{CDCl}_3$ )  $\delta$  156.7, 137.0, 133.7, 131.8, 131.1, 130.1, 129.5, 129.4, 129.2, 128.5, 128.1, 124.8, 124.1, 123.2, 118.9, 112.1, 112.0, 53.9. **HRMS** (ESI+):  $[\text{M}+\text{Ag}]^+$  calcd for  $\text{C}_{18}\text{H}_{12}\text{BrNO}_3\text{Ag}^+$  475.9046, found 475.9046.

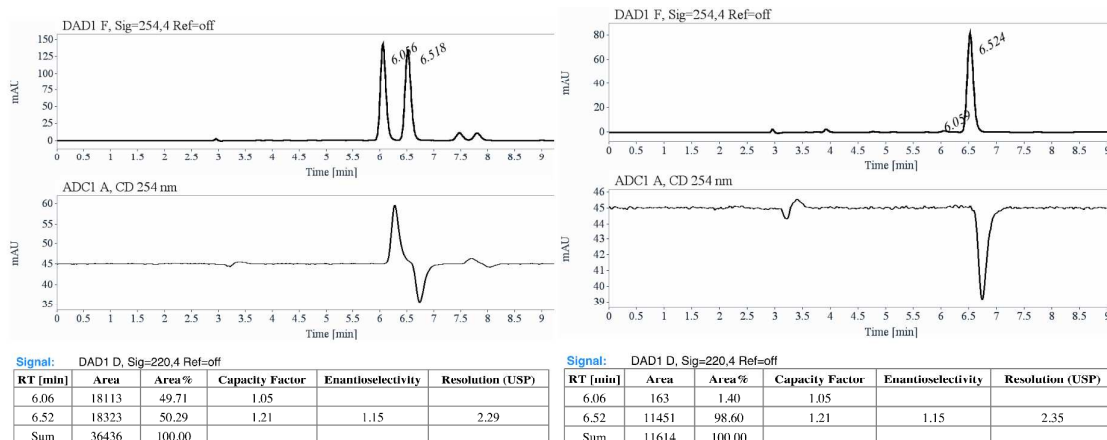

### (1R,2S)-1-(2-chlorophenyl)-2-nitro-1,2-dihydronaphtho[2,1-b]furan (9b)

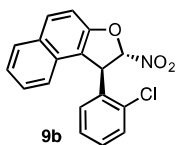

This compound was isolated as a white solid (101 mg, 82%); **mp** = 112-114 °C; **R<sub>f</sub>** = 0.57 (ethyl acetate/petroleum ether 1:9); **dr** (*trans/cis*) > 20:1; **HPLC** (Lux-Amylose 2, Heptane/ethanol = 90/10, flow rate = 1.0 mL/min,  $\lambda = 254$  nm):  $t_{\text{major}} = 8.53$  min,  $t_{\text{minor}} = 9.79$  min, **ee** = 97%;  $[\alpha]_{\text{D}}^{25}$  ( $\text{CHCl}_3$ ,  $c = 1.0$ ) = +185;  $^1\text{H}$  NMR (400 MHz,  $\text{CDCl}_3$ )  $\delta$  7.94 (1H, d,  $J = 9.0$  Hz, ArH), 7.91-7.87 (1H, m, ArH), 7.54 (1H, d,  $J = 7.7$ , ArH), 7.45 (1H, d,  $J = 9.0$  Hz, ArH), 7.42-7.33 (3H, m, ArH), 7.28-7.23 (1H, m, ArH), 7.07 (1H, dd,  $J = 7.7, 7.7$  Hz, ArH), 6.64 (1H, brd,  $J = 7.7$  Hz, ArH), 6.11 (1H, d,  $J = 1.2$  Hz, CH), 5.88 (1H, s, CH).  $^{13}\text{C}$  NMR (100 MHz,  $\text{CDCl}_3$ )  $\delta$  156.7, 135.2, 133.8, 131.8, 131.1, 130.4, 129.9, 129.6, 129.3, 129.2, 128.1, 127.9, 124.8, 123.1, 118.9, 112.1, 112.0, 51.4. **HRMS** (ESI+):  $[\text{M}+\text{Ag}]^+$  calcd for  $\text{C}_{18}\text{H}_{12}\text{ClNO}_3\text{Ag}^+$  431.9551, found 431.9558.

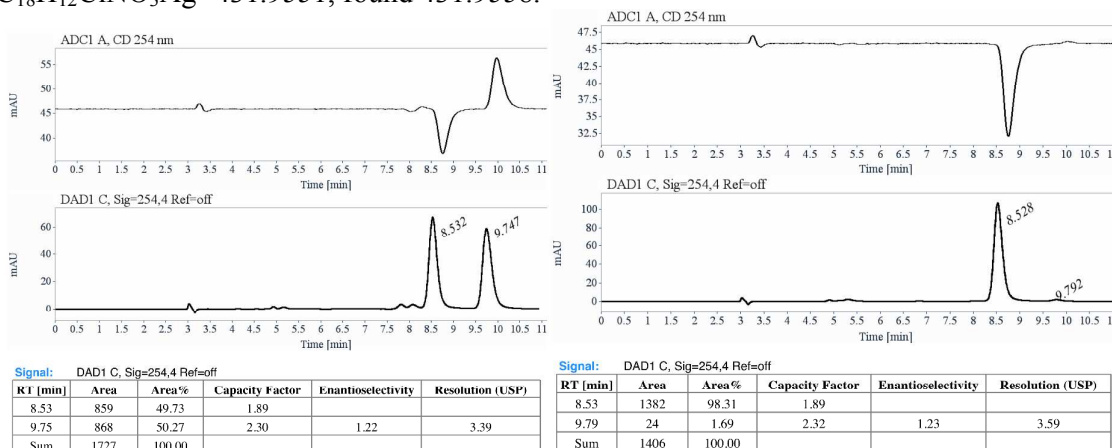

### (1R,2S)-1-(2-iodophenyl)-2-nitro-1,2-dihydronaphtho[2,1-b]furan (9c)

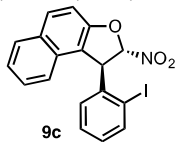

This compound was synthesized on 0.59 mmol scale and was isolated as a light green solid (196 mg, 80%); **mp** = 104-105 °C; **R<sub>f</sub>** = 0.40 (ethyl

acetate/petroleum ether 1:9); **dr** (*trans/cis*) > 20:1; **HPLC** (Chiralpak IB, Heptane/ethanol = 90/10, flow rate = 1.0 mL/min,  $\lambda$  = 254 nm):  $t_{\text{major}}$  = 5.61 min,  $t_{\text{minor}}$  = 5.99 min, ee = 97%;  $[\alpha]_{\text{D}}^{25}$  (CHCl<sub>3</sub>,  $c$  = 1.0) = +221; **<sup>1</sup>H NMR** (400 MHz, CDCl<sub>3</sub>)  $\delta$  8.01 (1H, dd,  $J$  = 7.9, 1.1 Hz, ArH), 7.93 (1H, d,  $J$  = 9.0 Hz, ArH), 7.88 (1H, dd,  $J$  = 7.3, 1.6 Hz, ArH), 7.45 (1H, d,  $J$  = 8.9 Hz, ArH), 7.44-7.32 (3H, m, ArH), 7.18-7.11 (1H, m, ArH), 6.99 (1H, ddd,  $J$  = 7.8, 7.8, 1.6 Hz, ArH), 6.59 (1H, d,  $J$  = 7.2 Hz, ArH), 6.06 (1H, s, CH), 5.82 (1H, s, CH). **<sup>13</sup>C NMR** (100 MHz, CDCl<sub>3</sub>)  $\delta$  156.6, 140.6, 140.5, 131.9, 131.1, 130.3, 129.5, 129.4, 129.2, 128.8, 128.1, 127.5, 124.9, 123.5, 119.7, 112.3, 112.0, 58.8. **HRMS** (ESI<sup>+</sup>):  $[M+Ag]^+$  calcd for C<sub>18</sub>H<sub>12</sub>INO<sub>3</sub>Ag<sup>+</sup> 523.8907, found 523.8912.

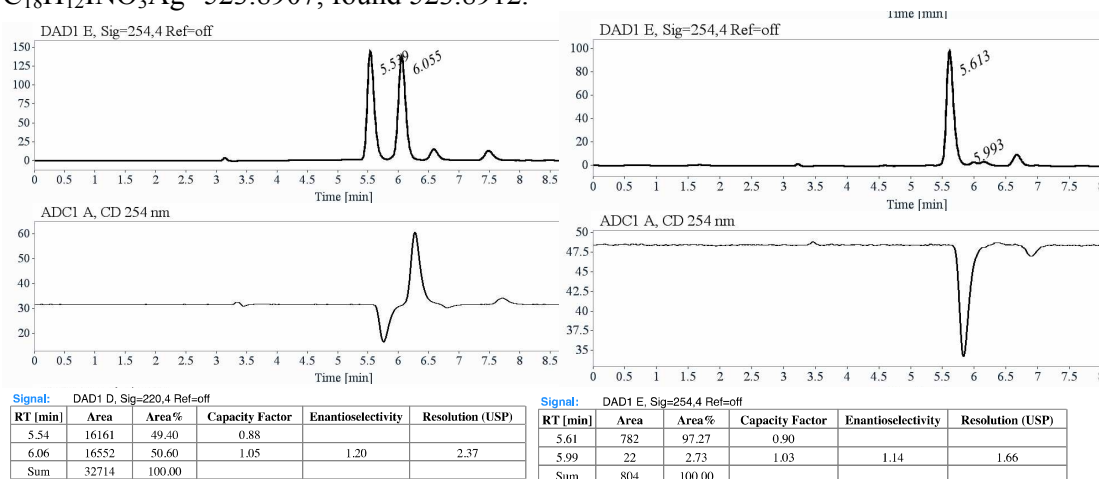

### Methyl 2-((1*S*,2*S*)-2-nitro-1,2-dihydronaphtho[2,1-*b*]furan-1-yl)benzoate (**9d**)

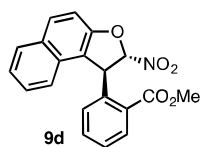

This compound was isolated as a white solid (91 mg, 69%); **mp** = 165-167 °C; **R<sub>f</sub>** = 0.47 (ethyl acetate/petroleum ether 1:9); **dr** (*trans/cis*) > 20:1; **HPLC** (Lux-Cellulose 2, Heptane/ethanol = 80/20, flow rate = 1.0 mL/min,  $\lambda$  = 254 nm):  $t_{\text{major}}$  = 6.52 min,  $t_{\text{minor}}$  = 7.46 min, ee = 96%;  $[\alpha]_{\text{D}}^{25}$  (CHCl<sub>3</sub>,  $c$  = 1.0) = +194; **<sup>1</sup>H NMR** (400 MHz, CDCl<sub>3</sub>)  $\delta$  8.07 (1H, d,  $J$  = 7.8 Hz, ArH), 7.92 (1H, d,  $J$  = 8.9 Hz, ArH), 7.92-7.87 (1H, m, ArH), 7.44-7.26 (6H, m, ArH), 6.73 (1H, d,  $J$  = 6.1 Hz, ArH), 6.42 (1H, s, CH), 6.14 (1H, s, CH), 4.02 (3H, s, OCH<sub>3</sub>). **<sup>13</sup>C NMR** (100 MHz, CDCl<sub>3</sub>)  $\delta$  168.1, 156.9, 138.6, 133.1, 131.5, 131.4, 131.0, 129.8, 129.7, 129.2, 129.1, 128.5, 127.8, 124.6, 123.4, 119.1, 113.7, 111.9, 52.9, 50.3. **HRMS** (ESI<sup>+</sup>):  $[M+Ag]^+$  calcd for C<sub>20</sub>H<sub>15</sub>NO<sub>5</sub>Ag<sup>+</sup> 455.9996, found 456.0002.

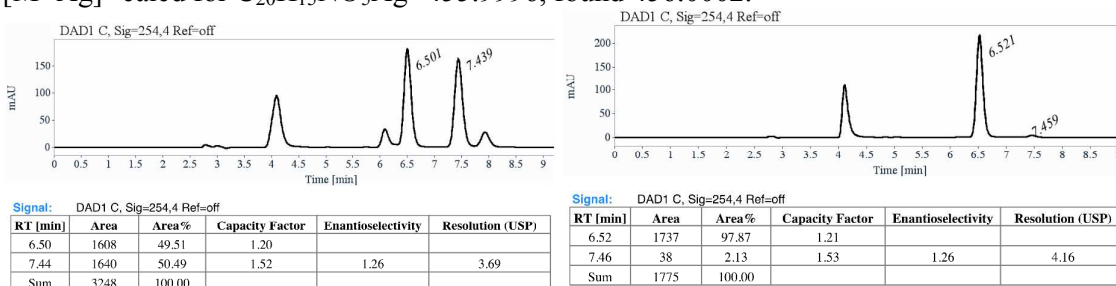

### (1*S*,2*S*)-2-nitro-1-(2-nitrophenyl)-1,2-dihydronaphtho[2,1-*b*]furan (**9e**)

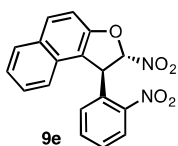

This compound was synthesized on 0.62 mmol and isolated as a white solid (193 mg, 93%); **mp** = 95-97 °C; **R<sub>f</sub>** = 0.42 (ethyl acetate/petroleum ether 2:8); **dr** (*trans/cis*) > 20:1; **HPLC** (Chiralpak AZ-H, Heptane/ethanol = 80/20, flow rate = 1.0 mL/min,  $\lambda$  = 254 nm):  $t_{\text{major}}$  = 11.56 min,  $t_{\text{minor}}$  = 9.36 min, ee = 96%;  $[\alpha]_{\text{D}}^{25}$  (CHCl<sub>3</sub>,  $c$  = 1.0) = +230; **<sup>1</sup>H NMR** (400 MHz,

CDCl<sub>3</sub>)  $\delta$  8.08 (1H, d,  $J$  = 8.1 Hz, ArH), 7.96 (1H, d,  $J$  = 8.9 Hz, ArH), 7.93-7.88 (1H, m, ArH), 7.50 (1H, ddd,  $J$  = 8.1, 7.1, 1.6 Hz, ArH), 7.46-7.37 (4H, m, ArH), 7.33-7.28 (1H, m, ArH), 6.80 (1H, d,  $J$  = 6.3 Hz, ArH), 6.20 (1H, s, CH), 6.06 (1H, s, CH). <sup>13</sup>C NMR (100 MHz, CDCl<sub>3</sub>)  $\delta$  157.1, 149.0, 134.2, 132.3, 132.0, 131.1, 130.3, 129.8, 129.4, 129.3, 128.3, 125.5, 125.0, 122.9, 117.5, 112.4, 111.9, 49.2. **HRMS** (ESI<sup>+</sup>): [M+Ag]<sup>+</sup> calcd for C<sub>18</sub>H<sub>12</sub>N<sub>2</sub>O<sub>5</sub>Ag<sup>+</sup> 442.9792, found 442.9791.

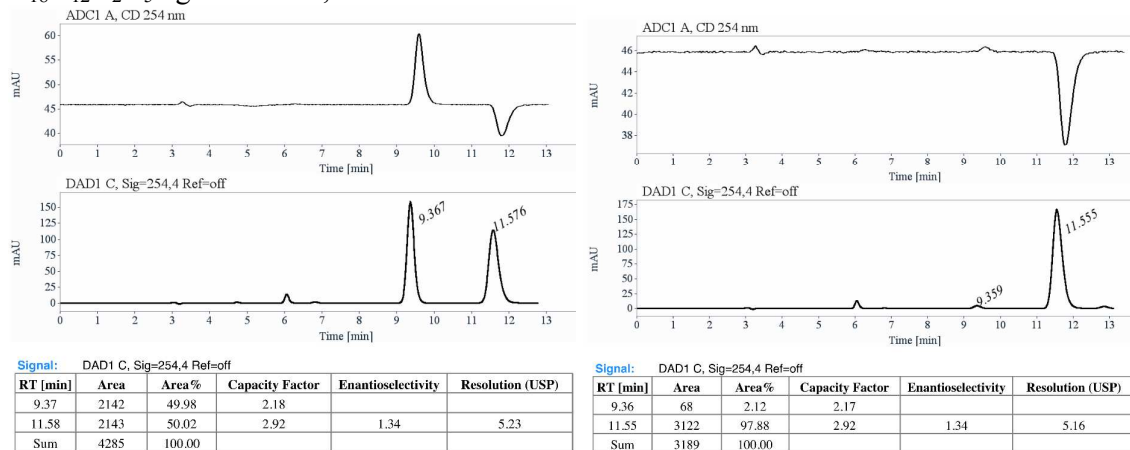

**(1*S*,2*S*)-2-Nitro-1-(6-nitrobenzo[*d*][1,3]dioxol-5-yl)-1,2-dihydronaphtho[2,1-*b*]furan (9f).**

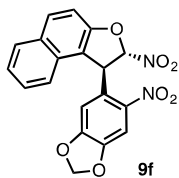

This compound was isolated as a slightly brown solid (556 mg, 83%); **mp** = 201 °C; **R<sub>f</sub>** = 0.45 (ethyl acetate/petroleum ether 1:4); **dr** (*trans/cis*) > 20:1; **HPLC** (Chiralpak IE, Heptane/ethanol = 50/50, flow rate = 1.0 mL/min,  $\lambda$  = 254 nm):  $t_{\text{major}}$  = 8.97 min,  $t_{\text{minor}}$  = 5.98 min, ee > 99%; [ $\alpha$ ]<sub>D</sub><sup>25</sup> (CHCl<sub>3</sub>,  $c$  = 1.6) = +234; <sup>1</sup>H NMR (400 MHz, CDCl<sub>3</sub>)  $\delta$  7.95 (1H, d,  $J$  = 9.0 Hz, ArH), 7.92-7.88 (1H, m, ArH), 7.59 (1H, s, ArH), 7.44-7.38 (3H, m, ArH), 7.37-7.31 (1H, m, ArH), 6.16 (1H, s, ArH), 6.13 (2H, s, CH<sub>2</sub>), 6.06 (1H, s, CH), 6.02 (1H, s, CH). <sup>13</sup>C NMR (100 MHz, CDCl<sub>3</sub>)  $\delta$  157.1, 152.7, 148.3, 143.0, 132.3, 131.2, 129.5, 129.4, 128.9, 128.3, 125.0, 122.9, 117.7, 112.7, 112.0, 108.7, 106.3, 103.5, 49.3. **HRMS** (ESI<sup>+</sup>): [M+NH<sub>4</sub>]<sup>+</sup> calcd for C<sub>19</sub>H<sub>16</sub>N<sub>3</sub>O<sub>7</sub><sup>+</sup> 398.0983, found 398.0982.

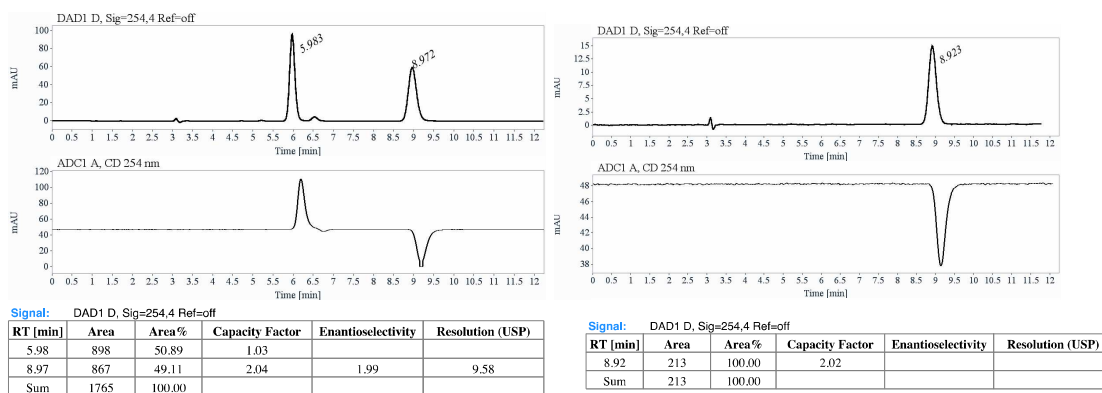

**(1*S*,2*S*)-2-nitro-1-(2-(trifluoromethyl)phenyl)-1,2-dihydronaphtho[2,1-*b*]furan (9g).**

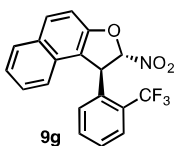

This compound was isolated as a white solid (72 mg, 53%); **mp** = 87-89 °C; **R<sub>f</sub>** = 0.30 (ethyl acetate/petroleum ether 1:9); **dr** (*trans/cis*) > 20:1; **HPLC** (Lux-Amylose-2, Heptane/ethanol = 95/5, flow rate = 1.0 mL/min,  $\lambda$  = 254 nm):

$t_{\text{major}} = 7.51 \text{ min}$ ,  $t_{\text{minor}} = 8.81 \text{ min}$ ,  $ee = 94\%$ ;  $[\alpha]_{\text{D}}^{25} (\text{CHCl}_3, c = 1.0) = +204$ ;  $^1\text{H NMR}$  (400 MHz,  $\text{CDCl}_3$ )  $\delta$  7.96 (1H, d,  $J = 9.0 \text{ Hz}$ , ArH), 7.92-7.81 (2H, m, ArH), 7.50-7.31 (6H, m, ArH), 6.76 (1H, d,  $J = 7.8 \text{ Hz}$ , ArH), 6.07 (1H, s, CH), 5.80 (1H, s, CH).  $^{13}\text{C NMR}$  (100 MHz,  $\text{CDCl}_3$ )  $\delta$  156.8, 136.1, 133.2, 132.1, 131.2, 129.6, 129.4, 129.3, 128.8, 128.4, 128.2, 126.7 (q,  $J = 5.8 \text{ Hz}$ ), 126.3, 124.9, 122.8, 119.1, 112.3, 111.8, 50.0. **HRMS** (ESI $^{+}$ ):  $[\text{M}+\text{Ag}]^{+}$  calcd for  $\text{C}_{19}\text{H}_{12}\text{NO}_3\text{F}_3\text{Ag}^{+}$  465.9815, found 465.9810.

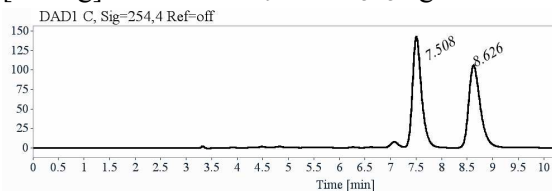

Signal: DAD1 C, Sig=254,4 Ref=off

| RT [min] | Area | Area%  | Capacity Factor | Enantioselectivity | Resolution (USP) |
|----------|------|--------|-----------------|--------------------|------------------|
| 7.51     | 1751 | 51.28  | 1.54            |                    |                  |
| 8.63     | 1663 | 48.72  | 1.92            | 1.25               | 3.13             |
| Sum      | 3414 | 100.00 |                 |                    |                  |

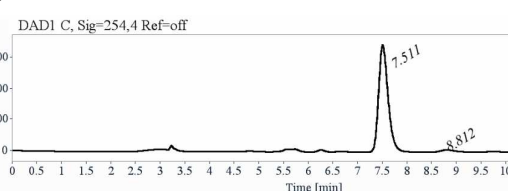

Signal: DAD1 C, Sig=254,4 Ref=off

| RT [min] | Area | Area%  | Capacity Factor | Enantioselectivity | Resolution (USP) |
|----------|------|--------|-----------------|--------------------|------------------|
| 7.51     | 4576 | 96.96  | 1.55            |                    |                  |
| 8.81     | 143  | 3.04   | 1.99            | 1.29               | 3.02             |
| Sum      | 4720 | 100.00 |                 |                    |                  |

### (2-((1*R*,2*S*)-2-nitro-1,2-dihydronaphtho[2,1-*b*]furan-1-yl)phenyl)diphenylphosphine oxide (9h).

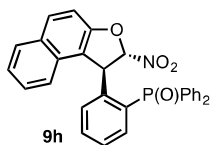

This compound was synthesized on 0.59 mmol and was isolated as a white solid (211 mg, 73%); **mp** = 174-176 °C; **R<sub>f</sub>** = 0.47 (ethyl acetate/petroleum ether 1:1); **dr** (*trans/cis*) > 20:1; **HPLC** (Lux-Cellulose-4, Heptane/ethanol = 95/5, flow rate = 1.0 mL/min,  $\lambda = 254 \text{ nm}$ ):  $t_{\text{major}} = 16.43 \text{ min}$ ,  $t_{\text{minor}} = 13.81 \text{ min}$ ,  $ee = 95\%$ ;  $[\alpha]_{\text{D}}^{25} (\text{CHCl}_3, c = 1.0) = +393$ ;  $^1\text{H NMR}$  (400 MHz,  $\text{CDCl}_3$ )  $\delta$  7.86-7.74 (6H, m, ArH), 7.66-7.52 (6H, m, ArH), 7.34-7.14 (7H, m, ArH), 6.74 (1H, dd,  $J = 7.7, 4.0 \text{ Hz}$ , ArH), 6.44 (1H, s, CH), 6.11 (1H, s, CH).  $^{13}\text{C NMR}$  (100 MHz,  $\text{CDCl}_3$ )  $\delta$  156.5, 142.8 (d,  $J = 7.0 \text{ Hz}$ ), 133.8 (d,  $J = 12.7 \text{ Hz}$ ), 133.0, 132.6, 132.5, 132.4 (d,  $J = 9.9 \text{ Hz}$ ), 132.0, 131.5 (d,  $J = 5.4 \text{ Hz}$ ), 131.3, 131.0, 130.0 (d,  $J = 8.9 \text{ Hz}$ ), 129.8, 129.0 (d,  $J = 12.1 \text{ Hz}$ ), 128.9, 126.7 (d,  $J = 12.1 \text{ Hz}$ ), 127.6, 124.5, 123.9, 120.2, 113.5, 111.8, 49.9.  $^{31}\text{P NMR}$  (162 MHz,  $\text{CDCl}_3$ )  $\delta$  31.8. **HRMS** (ESI $^{+}$ ):  $[\text{M}+\text{Ag}]^{+}$  calcd for  $\text{C}_{30}\text{H}_{22}\text{NO}_4\text{F}_3\text{Ag}^{+}$  598.0332, found 598.0342.

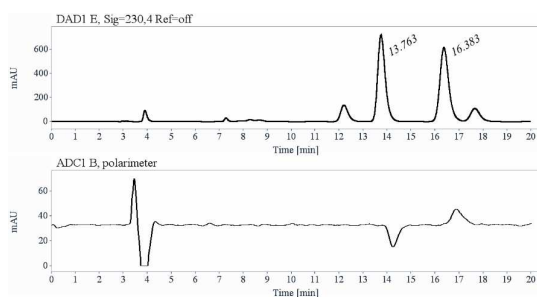

Signal: DAD1 D, Sig=220,4 Ref=off

| RT [min] | Area  | Area%  | Capacity Factor | Enantioselectivity | Resolution (USP) |
|----------|-------|--------|-----------------|--------------------|------------------|
| 13.76    | 15589 | 50.33  | 3.67            |                    |                  |
| 16.38    | 15383 | 49.67  | 4.55            | 1.24               | 4.24             |
| Sum      | 30972 | 100.00 |                 |                    |                  |

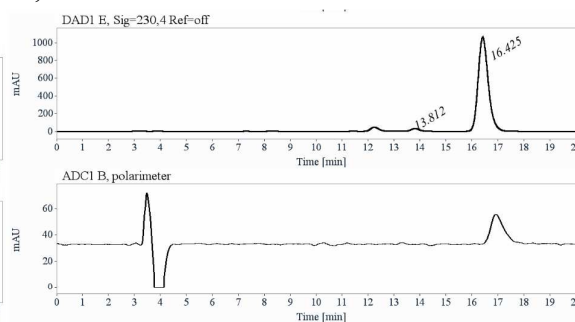

Signal: DAD1 D, Sig=220,4 Ref=off

| RT [min] | Area  | Area%  | Capacity Factor | Enantioselectivity | Resolution (USP) |
|----------|-------|--------|-----------------|--------------------|------------------|
| 13.81    | 693   | 2.39   | 3.68            |                    |                  |
| 16.43    | 28344 | 97.61  | 4.57            | 1.24               | 4.02             |
| Sum      | 29037 | 100.00 |                 |                    |                  |

**(1*S*,2*S*)-2-nitro-1-(*o*-tolyl)-1,2-dihydronaphtho[2,1-*b*]furan (9i).** This compound was isolated as a white solid (165 mg, 89%); **mp** = 127-128 °C; **R<sub>f</sub>** = 0.60 (ethyl acetate/petroleum ether 1:9); **dr** (*trans/cis*) > 20:1; **HPLC** (Chiralpak AD-H, Heptane/ethanol = 80/20, flow rate = 1.0 mL/min,  $\lambda = 254 \text{ nm}$ ):  $t_{\text{major}} =$

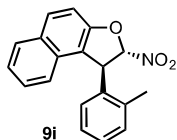

5.20 min,  $t_{\text{minor}} = 6.52$  min, ee = 93%;  $[\alpha]_{\text{D}}^{25}$  ( $\text{CHCl}_3$ ,  $c = 1.0$ ) = +131;  $^1\text{H NMR}$  (400 MHz,  $\text{CDCl}_3$ )  $\delta$  7.98-7.86 (2H, m, ArH), 7.48 (1H, d,  $J = 8.7$ , ArH), 7.41-7.32 (3H, m, ArH), 7.28-7.18 (2H, m, ArH), 7.00 (1H, dd,  $J = 7.9$ , 7.3 Hz, ArH), 6.52 (1H, d,  $J = 7.2$  Hz, ArH), 6.05 (1H, d,  $J = 1.5$  Hz, CH), 5.55 (1H, s, CH), 2.76 (3H, s,  $\text{CH}_3$ ).  $^{13}\text{C NMR}$  (100 MHz,  $\text{CDCl}_3$ )  $\delta$  156.7, 136.2, 135.9, 131.5, 131.4, 131.1, 129.6, 129.2, 128.5, 127.9, 127.6, 127.1, 124.7, 123.1, 119.1, 112.4, 112.0, 51.8, 20.3. **HRMS** (ESI+):  $[\text{M}+\text{Ag}]^+$  calcd for  $\text{C}_{19}\text{H}_{15}\text{NO}_3\text{Ag}^+$  412.0097, found 412.0096.

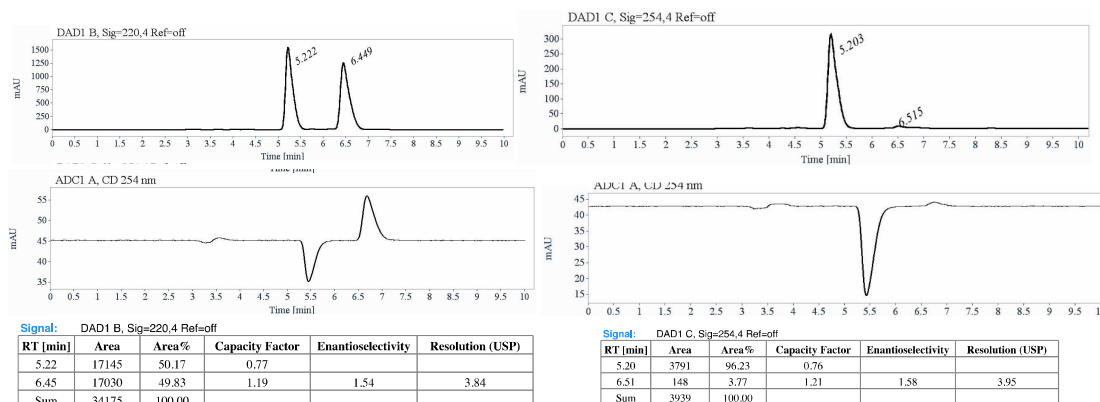

### (1*R*,2*S*)-8-bromo-1-(2-bromophenyl)-2-nitro-1,2-dihydronaphtho[2,1-*b*]furan (9j)

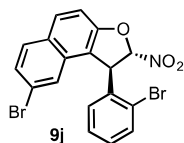

This compound was isolated as a white solid (140 mg, 82%); **mp** = 166-167 °C; **R<sub>f</sub>** = 0.40 (ethyl acetate/petroleum ether 1:9); **dr** (*trans/cis*) > 20:1; **HPLC** (Chiralpak IB, Heptane/ethanol = 95/5, flow rate = 1.0 mL/min,  $\lambda = 254$  nm):  $t_{\text{major}} = 6.23$  min,  $t_{\text{minor}} = 7.02$  min, ee = 96%;  $[\alpha]_{\text{D}}^{25}$  ( $\text{CHCl}_3$ ,  $c = 1.0$ ) = +128;  $^1\text{H NMR}$  (400 MHz,  $\text{CDCl}_3$ )  $\delta$  7.88 (1H, d,  $J = 8.9$  Hz, ArH), 7.76-7.70 (2H, m, ArH), 7.50 (1H, d,  $J = 1.6$  Hz, ArH), 7.46-7.41 (2H, m, ArH), 7.21-7.09 (2H, m, ArH), 6.57 (1H, brs, ArH), 6.08 (1H, s, CH), 5.81 (1H, s, CH).  $^{13}\text{C NMR}$  (100 MHz,  $\text{CDCl}_3$ )  $\delta$  157.5, 136.5, 134.0, 131.9, 130.9, 130.8, 130.4, 129.5, 129.2, 128.7, 128.5, 125.5, 124.1, 122.7, 118.2, 112.4, 112.0, 53.6. **HRMS** (ESI+):  $[\text{M}+\text{NH}_4]^+$  calcd for  $\text{C}_{18}\text{H}_{15}\text{Br}_2\text{N}_2\text{O}_3$  466.9425, found 466.9425.

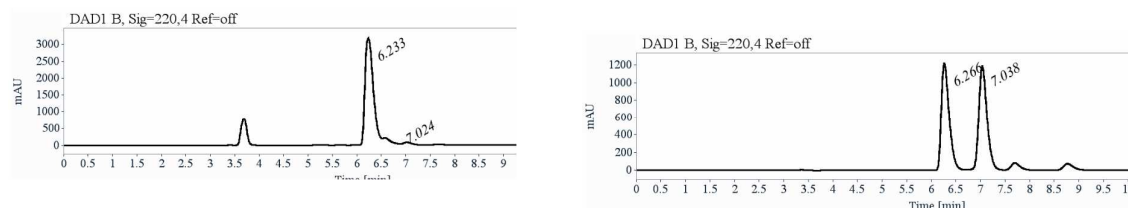

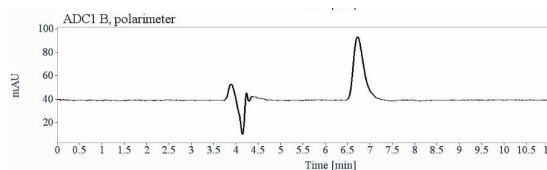

Signal: DAD1 B, Sig=220,4 Ref=off

| RT [min] | Area  | Area%  | Capacity Factor | Enantioselectivity | Resolution (USP) |
|----------|-------|--------|-----------------|--------------------|------------------|
| 6.23     | 37856 | 97.37  | 1.11            |                    |                  |
| 7.02     | 1023  | 2.63   | 1.38            | 1.24               | 2.49             |
| Sum      | 38879 | 100.00 |                 |                    |                  |

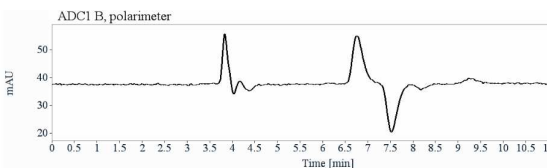

Signal: DAD1 B, Sig=220,4 Ref=off

| RT [min] | Area  | Area%  | Capacity Factor | Enantioselectivity | Resolution (USP) |
|----------|-------|--------|-----------------|--------------------|------------------|
| 6.27     | 13401 | 49.55  | 1.12            |                    |                  |
| 7.04     | 13647 | 50.45  | 1.39            | 1.23               | 2.62             |
| Sum      | 27048 | 100.00 |                 |                    |                  |

### (1*R*,2*S*)-7-bromo-1-(2-bromophenyl)-2-nitro-1,2-dihydronaphtho[2,1-*b*]furan (9j)

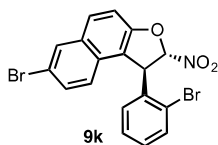

This compound was isolated as a white solid (136 mg, 80%); **mp** = 145-147 °C; **R<sub>f</sub>** = 0.45 (ethyl acetate/petroleum ether 1:9); **dr** (*trans/cis*) > 20:1; **HPLC** (Chiralpak IB, Heptane/ethanol = 95/5, flow rate = 1.0 mL/min, λ = 254 nm): *t*<sub>major</sub> = 5.97 min, *t*<sub>minor</sub> = 6.46 min, ee = 95%; [α]<sub>D</sub><sup>25</sup> (CHCl<sub>3</sub>, *c* = 1.0) = +128; <sup>1</sup>H NMR (400 MHz, CDCl<sub>3</sub>) δ 8.05 (1H, d, *J* = 1.8 Hz, ArH), 7.84 (1H, d, *J* = 8.9 Hz, ArH), 7.73 (1H, dd, *J* = 8.0, 1.3 Hz, ArH), 7.49-7.44 (2H, m, ArH), 7.27-7.09 (3H, m, ArH), 6.58 (1H, brs, ArH), 6.11 (1H, s, CH), 5.87 (1H, s, CH). <sup>13</sup>C NMR (100 MHz, CDCl<sub>3</sub>) δ 156.9, 136.7, 133.8, 132.2, 131.4, 131.2, 131.0, 130.4, 129.3, 128.7, 128.1, 124.9, 124.1, 119.3, 118.6, 113.1, 112.0, 53.7. **HRMS** (ESI<sup>+</sup>): [M+Na]<sup>+</sup> calcd for C<sub>18</sub>H<sub>11</sub>Br<sub>2</sub>NO<sub>3</sub>Na<sup>+</sup> 471.8978, found 471.8980.

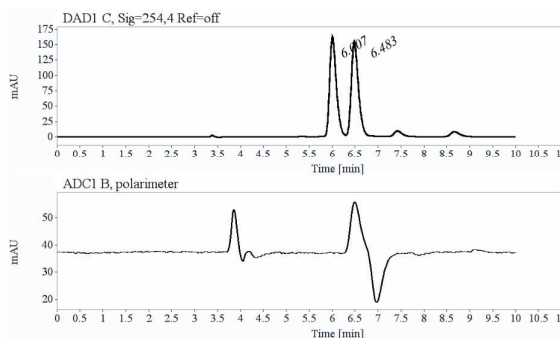

Signal: DAD1 B, Sig=220,4 Ref=off

| RT [min] | Area  | Area%  | Capacity Factor | Enantioselectivity | Resolution (USP) |
|----------|-------|--------|-----------------|--------------------|------------------|
| 6.01     | 13211 | 49.75  | 1.04            |                    |                  |
| 6.48     | 13343 | 50.25  | 1.20            | 1.16               | 1.75             |
| Sum      | 26555 | 100.00 |                 |                    |                  |

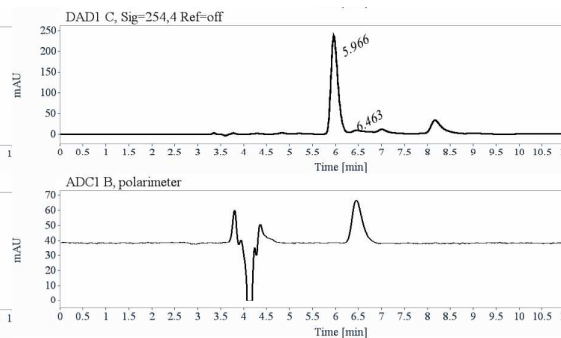

Signal: DAD1 B, Sig=220,4 Ref=off

| RT [min] | Area  | Area%  | Capacity Factor | Enantioselectivity | Resolution (USP) |
|----------|-------|--------|-----------------|--------------------|------------------|
| 5.97     | 20167 | 97.45  | 1.02            |                    |                  |
| 6.45     | 528   | 2.55   | 1.19            | 1.16               | 1.58             |
| Sum      | 20695 | 100.00 |                 |                    |                  |

### (1*R*,2*S*)-7-bromo-1-(2-bromophenyl)-2-nitro-1,2-dihydronaphtho[2,1-*b*]furan (9j)

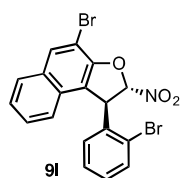

This compound was isolated as a white solid (131 mg, 77%); **mp** = 154-156 °C; **R<sub>f</sub>** = 0.50 (ethyl acetate/petroleum ether 1:9); **dr** (*trans/cis*) > 20:1; **HPLC** (Chiralpak IB, Heptane/ethanol = 95/5, flow rate = 1.0 mL/min, λ =

254 nm):  $t_{\text{major}} = 5.96$  min,  $t_{\text{minor}} = 6.72$  min, ee = 97%;  $[\alpha]_{\text{D}}^{25}$  ( $\text{CHCl}_3$ ,  $c = 1.0$ ) = +152;  $^1\text{H}$  NMR (400 MHz,  $\text{CDCl}_3$ )  $\delta$  8.14 (1H, s, ArH), 7.86-7.81 (1H, m, ArH), 7.76 (1H, dd,  $J = 7.7$ , 1.5 Hz, ArH), 7.46-7.39 (2H, m, ArH), 7.37-7.32 (1H, m, ArH), 7.24-7.13 (2H, m, ArH), 6.67 (1H, brs, ArH), 6.18 (1H, s, CH), 6.00 (1H, s, CH).  $^{13}\text{C}$  NMR (100 MHz,  $\text{CDCl}_3$ )  $\delta$  153.8, 136.4, 133.9, 133.7, 132.1, 130.4, 129.4, 128.7, 128.5, 128.4, 128.3, 125.8, 124.0, 123.3, 120.4, 111.4, 104.4, 54.8. HRMS (ESI+):  $[\text{M}+\text{NH}_4]^+$  calcd for  $\text{C}_{18}\text{H}_{15}\text{Br}_2\text{N}_2\text{O}_3^+$  466.9425, found 466.9427.

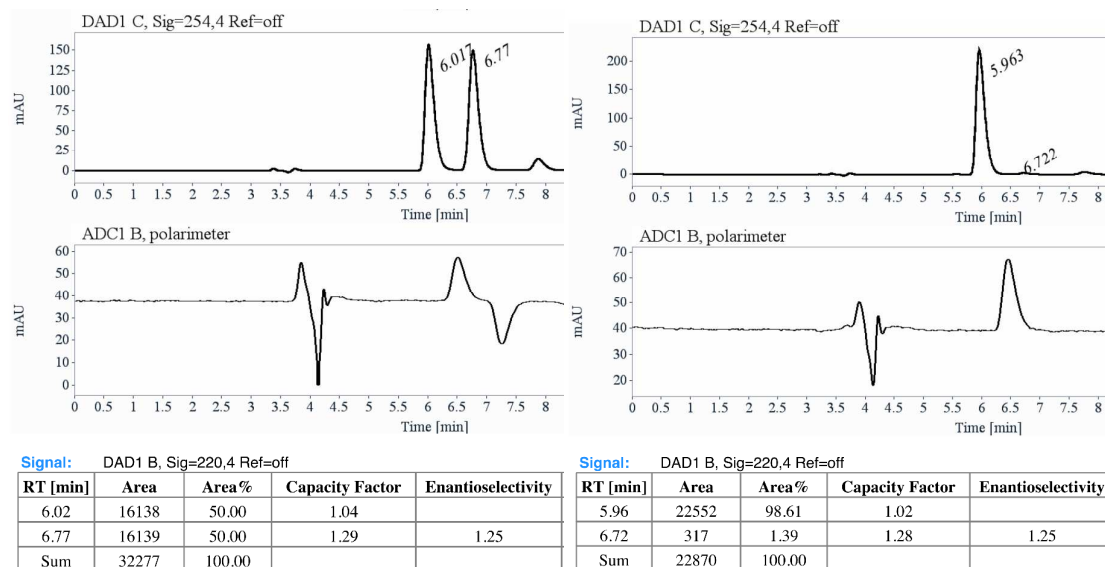

**(1R,2S)-1-(2-bromophenyl)-8-methoxy-2-nitro-1,2-dihydronaphtho[2,1-b]furan (9m)**

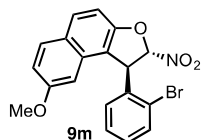

This compound was isolated as a white solid (133 mg, 88%); mp = 161-162 °C; **R<sub>f</sub>** = 0.42 (ethyl acetate/petroleum ether 1:9); **dr** (*trans/cis*) > 20:1; HPLC (Chiralpak IB, Heptane/ethanol = 95/5, flow rate = 1.0 mL/min,  $\lambda = 254$  nm):  $t_{\text{major}} = 7.85$  min,  $t_{\text{minor}} = 9.58$  min, ee = 96%;  $[\alpha]_{\text{D}}^{25}$  ( $\text{CHCl}_3$ ,  $c = 1.0$ ) = +227;  $^1\text{H}$  NMR (400 MHz,  $\text{CDCl}_3$ )  $\delta$  7.82 (1H, d,  $J = 8.9$  Hz, ArH), 7.75 (1H, d,  $J = 8.9$  Hz, ArH), 7.73-7.69 (1H, m, ArH), 7.29 (1H, d,  $J = 8.9$  Hz, ArH), 7.19-7.14 (1H, m, ArH), 7.01 (1H, dd,  $J = 8.9$ , 2.5 Hz, ArH), 6.74 (1H, brs, ArH), 6.68 (1H, d,  $J = 2.5$  Hz, ArH), 6.12 (1H, s, CH), 5.86 (1H, s, CH).  $^{13}\text{C}$  NMR (100 MHz,  $\text{CDCl}_3$ )  $\delta$  159.3, 156.9, 137.2, 133.5, 131.4, 130.9, 130.7, 130.1, 129.3, 128.8, 126.4, 123.9, 118.6, 117.6, 112.1, 109.2, 101.6, 55.6, 53.9. HRMS (ESI+):  $[\text{M}+\text{Na}]^+$  calcd for  $\text{C}_{19}\text{H}_{14}\text{BrNO}_4\text{Na}^+$  421.9998, found 421.0000.

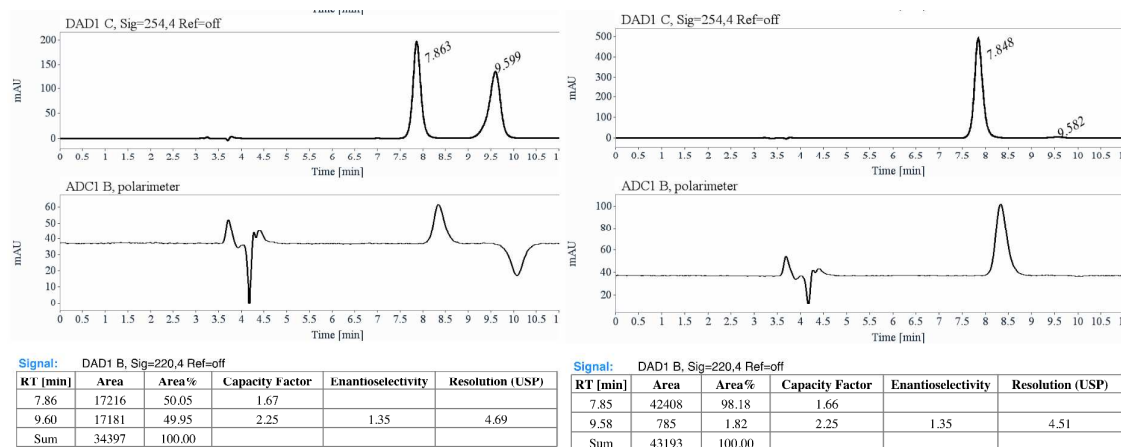

## General procedure for the oxidation of dihydrofuran 9a-m to furan atropisomers 10a-m

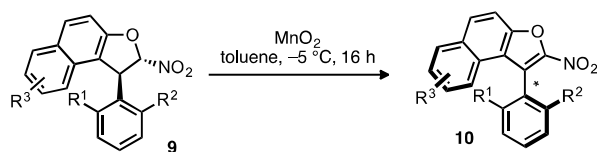

$\text{MnO}_2$  (20 equiv) was added in a clear solution of the corresponding enantioenriched 2,3-dihydrofuran in toluene **9a-m** at  $-5^\circ\text{C}$  and reaction mass stirred for 16 h at same temperature. The progress of the reaction was monitored by TLC. After completion of the reaction, the crude product was directly purified by means of flash silica gel column chromatography using pad of celite on the top of silica in column to give the desired furan **10a-m**.

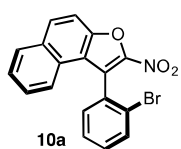

**(aS)-1-(2-bromophenyl)-2-nitronaphtho[2,1-b]furan (10a).** This compound was isolated as a yellow solid (32 mg, 84%); **mp** =  $140\text{--}142^\circ\text{C}$ ; **R<sub>f</sub>** = 0.36 (ethyl acetate/petroleum ether 1:9); **HPLC** (Lux-Cellulose 2, Heptane/ethanol = 80/20, flow rate = 1.0 mL/min,  $\lambda$  = 254 nm):  $t_{\text{major}}$  = 7.23 min,  $t_{\text{minor}}$  = 8.79 min, ee = 97%; **Chirality conversion percentage** = 100%;  $[\alpha]_{\text{D}}^{25}$  ( $\text{CHCl}_3$ ,  $c$  = 1.0) =  $-9$ ;  **$^1\text{H}$  NMR** (400 MHz,  $\text{CDCl}_3$ )  $\delta$  8.06 (1H, d,  $J$  = 9.0 Hz, ArH), 7.98 (1H, d,  $J$  = 8.1 Hz, ArH), 7.88–7.84 (1H, m, ArH), 7.59 (1H, s, ArH), 7.76 (1H, d,  $J$  = 9.0 Hz, ArH), 7.58–7.46 (4H, m, ArH), 7.44–7.35 (2H, m, ArH).  **$^{13}\text{C}$  NMR** (100 MHz,  $\text{CDCl}_3$ )  $\delta$  150.6, 148.2, 133.5, 132.9, 132.1, 131.4, 131.1, 130.7, 129.8, 128.6, 128.4, 128.3, 126.4, 123.5, 123.2, 122.8, 121.5, 112.4. **HRMS** (ESI<sup>+</sup>):  $[\text{M}+\text{H}]^+$  calcd for  $\text{C}_{18}\text{H}_{11}\text{NO}_3\text{Br}^+$  367.9917, found 367.9917.

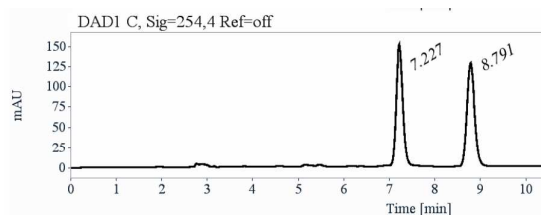

Signal: DAD1 B, Sig=220,4 Ref=off

| RT [min] | Area  | Area%  | Capacity Factor | Enantioselectivity |
|----------|-------|--------|-----------------|--------------------|
| 7.23     | 9459  | 50.10  | 1.45            |                    |
| 8.79     | 9420  | 49.90  | 1.98            | 1.37               |
| Sum      | 18879 | 100.00 |                 |                    |

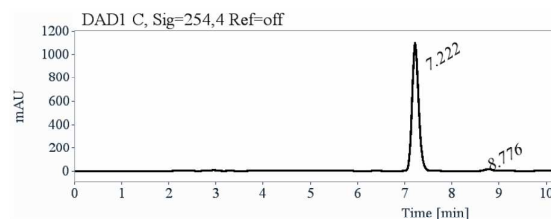

Signal: DAD1 C, Sig=254,4 Ref=off

| RT [min] | Area  | Area%  | Capacity Factor | Enantioselectivity |
|----------|-------|--------|-----------------|--------------------|
| 7.22     | 10686 | 98.68  | 1.45            |                    |
| 8.78     | 143   | 1.32   | 1.97            | 1.36               |
| Sum      | 10829 | 100.00 |                 |                    |

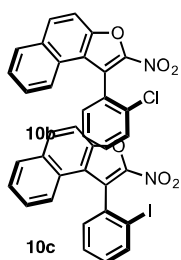

**(aS)-1-(2-chlorophenyl)-2-nitronaphtho[2,1-b]furan (10b).**

This compound was isolated as a yellow solid (106 mg, 92%); **mp** = 182-184 °C; **R<sub>f</sub>** = 0.50 (ethyl acetate/petroleum ether 1:9); **HPLC** (Lux-Cellulose 2, Heptane/ethanol = 80/20, flow rate = 1.0 mL/min,  $\lambda$  = 254 nm):  $t_{\text{major}}$  = 6.99 min,  $t_{\text{minor}}$  = 7.95 min, ee = 93%; **Chirality conversion percentage** = 96%;  $[\alpha]_{\text{D}}^{25}$  (CHCl<sub>3</sub>,  $c$  = 1.0) = -34; **<sup>1</sup>H NMR** (400 MHz, CDCl<sub>3</sub>)  $\delta$  8.06 (1H, d,  $J$  = 9.0 Hz, ArH), 7.98 (1H, d,  $J$  = 8.2 Hz, ArH), 7.76 (1H, d,  $J$  = 9.0 Hz, ArH), 7.68 (1H, ddd,  $J$  = 8.0, 0.9, 0.9 Hz, ArH), 7.60-7.48 (4H, m, ArH), 7.44-7.39 (2H, m, ArH). **<sup>13</sup>C NMR** (100 MHz, CDCl<sub>3</sub>)  $\delta$  150.6, 148.3, 133.9, 132.8, 131.4, 131.0, 130.8, 130.3, 129.9, 129.8, 128.6, 128.3, 127.7, 126.4, 122.7, 121.6, 121.4, 112.4. **HRMS** (ESI<sup>+</sup>): [M+H]<sup>+</sup> calcd for C<sub>18</sub>H<sub>11</sub>NO<sub>3</sub>Cl<sup>+</sup> 324.0422, found 324.0421.

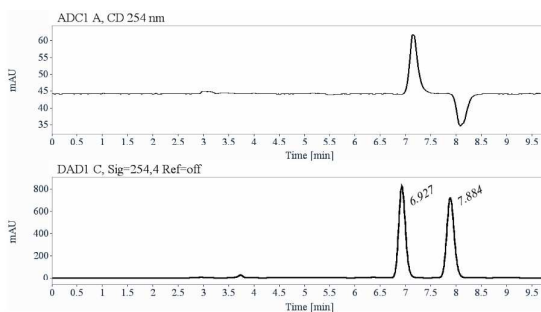

Signal: DAD1 C, Sig=254,4 Ref=off

| RT [min] | Area  | Area%  | Capacity Factor | Enantioselectivity | Resolution (USP) |
|----------|-------|--------|-----------------|--------------------|------------------|
| 6.93     | 7761  | 50.81  | 1.35            |                    |                  |
| 7.88     | 7513  | 49.19  | 1.67            | 1.24               | 3.68             |
| Sum      | 15274 | 100.00 |                 |                    |                  |

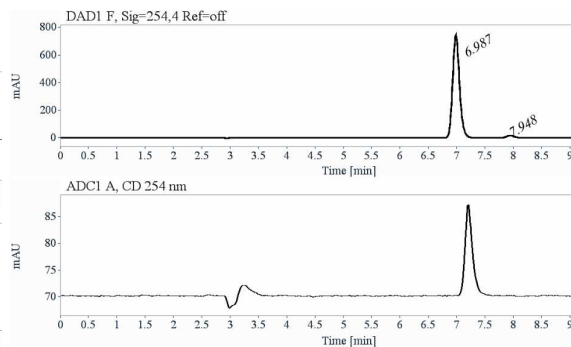

Signal: DAD1 D, Sig=220,4 Ref=off

| RT [min] | Area  | Area%  | Capacity Factor | Enantioselectivity | Resolution (USP) |
|----------|-------|--------|-----------------|--------------------|------------------|
| 6.99     | 30207 | 96.70  | 1.37            |                    |                  |
| 7.95     | 1031  | 3.30   | 1.69            | 1.24               | 3.86             |
| Sum      | 31239 | 100.00 |                 |                    |                  |

**(aS)-1-(2-iodophenyl)-2-nitronaphtho[2,1-b]furan (10c).** This compound was isolated as a dark-green solid (447 mg, 90%); **mp** = 180-181 °C; **R<sub>f</sub>** = 0.40 (ethyl acetate/petroleum ether 1:9); **HPLC** (Lux-Cellulose 2, Heptane/ethanol = 80/20, flow rate = 1.0 mL/min,  $\lambda$  = 254 nm):  $t_{\text{major}}$  = 7.66 min,  $t_{\text{minor}}$  = 11.31 min, ee = 97%; **Chirality conversion percentage** = 100%;  $[\alpha]_{\text{D}}^{25}$  (CHCl<sub>3</sub>,  $c$  = 1.0) = -3; **<sup>1</sup>H NMR** (400 MHz, CDCl<sub>3</sub>)  $\delta$  8.12 (1H, dd,  $J$  = 8.2, 1.1 Hz, ArH), 8.07 (1H, d,  $J$  = 9.1 Hz, ArH), 7.99 (1H, d,  $J$  = 8.2 Hz, ArH), 7.76 (1H, d,  $J$  = 9.1 Hz, ArH), 7.62-7.52 (2H, m, ArH), 7.47-7.38 (2H, m, ArH), 7.35-7.28 (2H, m, ArH). **<sup>13</sup>C NMR** (100 MHz, CDCl<sub>3</sub>)  $\delta$  150.6, 148.0, 139.8, 136.3, 132.9, 131.4, 131.0, 129.9, 129.8, 129.1, 128.6, 128.4, 126.5, 126.3, 122.9, 121.4, 112.4, 98.5. **HRMS** (ESI<sup>+</sup>): [M+H]<sup>+</sup> calcd for C<sub>18</sub>H<sub>11</sub>NO<sub>3</sub>I<sup>+</sup> 415.9778, found 415.9780.

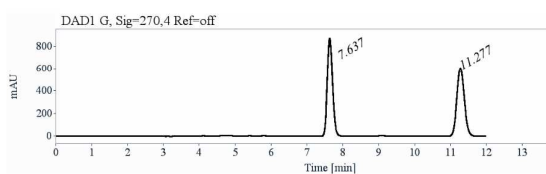

Signal: DAD1 F, Sig=254,4 Ref=off

| RT [min] | Area  | Area%  | Capacity Factor | Enantioselectivity | Resolution (USP) |
|----------|-------|--------|-----------------|--------------------|------------------|
| 7.64     | 7609  | 50.60  | 1.59            |                    |                  |
| 11.28    | 7430  | 49.40  | 2.82            | 1.78               | 11.19            |
| Sum      | 15040 | 100.00 |                 |                    |                  |

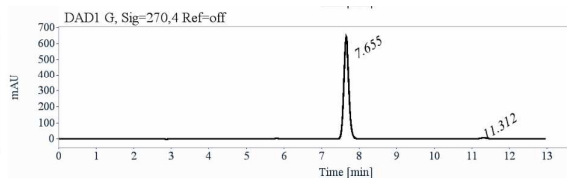

Signal: DAD1 F, Sig=254,4 Ref=off

| RT [min] | Area | Area%  | Capacity Factor | Enantioselectivity | Resolution (USP) |
|----------|------|--------|-----------------|--------------------|------------------|
| 7.66     | 5019 | 98.32  | 1.60            |                    |                  |
| 11.31    | 86   | 1.68   | 2.83            | 1.78               | 12.26            |
| Sum      | 5105 | 100.00 |                 |                    |                  |

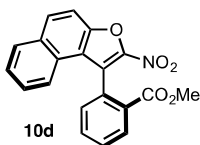

**(aS)-methyl 2-(2-nitronaphtho[2,1-b]furan-1-yl)benzoate (10d).** This compound was isolated as a yellow solid (100 mg, 89%); mp = 156-159 °C; **R<sub>f</sub>** = 0.45 (ethyl acetate/petroleum ether 1:9); **HPLC** (Lux-Cellulose 4, Heptane/ethanol = 60/40, flow rate = 1.0 mL/min, λ = 254 nm): t<sub>major</sub> = 8.94 min, t<sub>minor</sub> = 6.95 min, ee = 95%; **Chirality conversion percentage** = 99%; [α]<sub>D</sub><sup>25</sup> (CHCl<sub>3</sub>, c = 1.0) = +102; **<sup>1</sup>H NMR** (400 MHz, CDCl<sub>3</sub>) δ 8.34 (1H, dd, J = 7.7, 1.7 Hz, ArH), 8.04 (1H, d, J = 9.1 Hz, ArH), 7.97 (1H, d, J = 8.2 Hz, ArH), 7.79-7.68 (3H, m, ArH), 7.51-7.47 (2H, m, ArH), 7.35 (1H, ddd, J = 8.2, 7.0, 1.4 Hz, ArH), 7.26 (1H, d, J = 8.2 Hz, ArH). **<sup>13</sup>C NMR** (100 MHz, CDCl<sub>3</sub>) δ 166.2, 150.6, 147.8, 133.3, 132.6, 132.4, 131.7, 131.4, 130.5, 129.8, 129.7, 129.6, 128.7, 128.1, 126.2, 124.8, 122.8, 122.2, 112.5, 52.4. **HRMS** (ESI<sup>+</sup>): [M+H]<sup>+</sup> calcd for C<sub>20</sub>H<sub>14</sub>NO<sub>5</sub><sup>+</sup> 348.0866, found 348.0866.

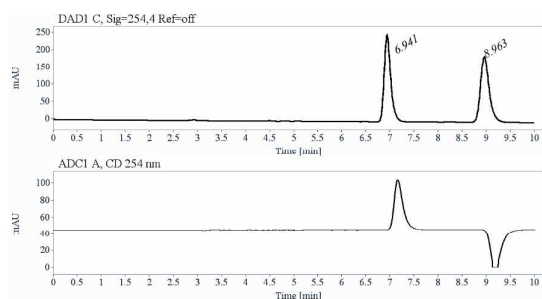

Signal: DAD1 B, Sig=220,4 Ref=off

| RT [min] | Area  | Area%  | Capacity Factor | Enantioselectivity | Resolution (USP) |
|----------|-------|--------|-----------------|--------------------|------------------|
| 6.94     | 14160 | 49.90  | 1.35            |                    |                  |
| 8.96     | 14217 | 50.10  | 2.04            | 1.51               | 7.24             |
| Sum      | 28376 | 100.00 |                 |                    |                  |

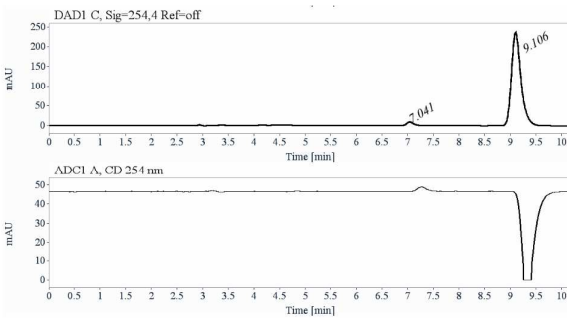

Signal: DAD1 B, Sig=220,4 Ref=off

| RT [min] | Area  | Area%  | Capacity Factor | Enantioselectivity | Resolution (USP) |
|----------|-------|--------|-----------------|--------------------|------------------|
| 7.04     | 551   | 2.96   | 1.39            |                    |                  |
| 9.11     | 18058 | 97.04  | 2.09            | 1.50               | 7.26             |
| Sum      | 18609 | 100.00 |                 |                    |                  |

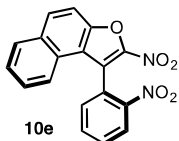

**(aS)-2-nitro-1-(2-nitrophenyl)naphtho[2,1-b]furan (10e).** This compound was isolated as a yellow solid (90 mg, 87%); mp = 222-224 °C; **R<sub>f</sub>** = 0.35 (ethyl acetate/petroleum ether 1:4); **HPLC** (Chiralpak IC, Heptane/ethanol = 80/20, flow rate = 1.0 mL/min, λ = 254 nm): t<sub>major</sub> = 7.06 min, t<sub>minor</sub> = 8.16 min, ee = 89%; **Chirality conversion percentage** = 93%; [α]<sub>D</sub><sup>25</sup> (CHCl<sub>3</sub>, c = 1.0) = +110; **<sup>1</sup>H NMR** (400 MHz, CDCl<sub>3</sub>) δ 8.45 (1H, dd, J = 8.0, 1.6 Hz, ArH), 8.07 (1H, d, J = 9.0 Hz, ArH), 7.99 (1H, d, J = 8.3 Hz, ArH), 7.87 (1H, ddd, J = 7.3, 7.3, 1.6 Hz, ArH), 7.82 (1H, ddd, J = 7.6, 7.6, 1.6 Hz, ArH), 7.76 (1H, d, J = 9.0 Hz, ArH), 7.58 (1H, dd, J = 7.3, 1.8 Hz, ArH), 7.53 (1H, ddd, J = 7.6, 7.3, 1.3 Hz, ArH), 7.37 (1H, ddd, J = 8.3, 7.0, 1.3 Hz, ArH), 7.25 (1H, d, J = 8.3 Hz, ArH). **<sup>13</sup>C NMR** (100 MHz, CDCl<sub>3</sub>) δ 150.9, 148.1, 147.5, 134.5, 133.1, 131.7, 131.5, 130.9, 130.1, 128.4, 128.3, 126.6, 126.5, 125.9, 122.4, 121.6, 121.1, 112.5. **HRMS** (ESI<sup>+</sup>): [M+H]<sup>+</sup> calcd for C<sub>18</sub>H<sub>11</sub>N<sub>2</sub>O<sub>5</sub><sup>+</sup> 335.0662, found 335.0661.

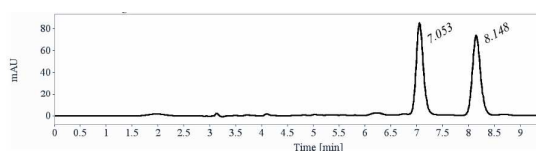

Signal: DAD1 B, Sig=220.4 Ref=off

| RT [min] | Area | Area%  | Capacity Factor | Enantioselectivity | Resolution (USP) |
|----------|------|--------|-----------------|--------------------|------------------|
| 7.05     | 3069 | 49.94  | 1.39            |                    |                  |
| 8.15     | 3077 | 50.06  | 1.76            | 1.27               | 4.05             |
| Sum      | 6146 | 100.00 |                 |                    |                  |

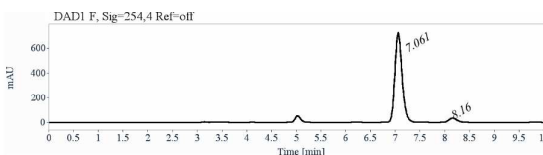

Signal: DAD1 D, Sig=220.4 Ref=off

| RT [min] | Area  | Area%  | Capacity Factor | Enantioselectivity | Resolution (USP) |
|----------|-------|--------|-----------------|--------------------|------------------|
| 7.06     | 26734 | 94.65  | 1.39            |                    |                  |
| 8.16     | 1511  | 5.35   | 1.77            | 1.27               | 3.81             |
| Sum      | 28244 | 100.00 |                 |                    |                  |

**(*aS*)-2-Nitro-1-(6-nitrobenzo[*d*][1,3]dioxol-5-yl)naphtho[2,1-*b*]furan (10f).** This compound was isolated as a yellow-brown solid (200 mg, 85%); **mp** = 203–204 °C; **R<sub>f</sub>** = 0.41 (ethyl acetate/petroleum ether 1:4); **HPLC** (Chiralpak IB, Heptane/ethanol = 80/20, flow rate = 1.0 mL/min, λ = 254 nm): *t*<sub>major</sub> = 9.52 min, *t*<sub>minor</sub> = 13.14 min, ee = 93%; **Chirality conversion percentage** = 93%; [α]<sub>D</sub><sup>25</sup> (CHCl<sub>3</sub>, *c* = 1.0) = +91.7; <sup>1</sup>H NMR (400 MHz, CDCl<sub>3</sub>) δ 8.06 (1H, d, *J* = 9.0 Hz, ArH), 7.99 (1H, d, *J* = 8.3 Hz, ArH), 7.92 (1H, s, ArH), 7.59 (1H, s, ArH), 7.75 (1H, d, *J* = 9.0 Hz, ArH), 7.55 (1H, ddd, *J* = 8.2, 6.6, 1.6 Hz, ArH), 7.47–7.39 (2H, m, ArH), 6.87 (1H, s, ArH), 6.32 (1H, d, *J* = 1.0 Hz, CHH), 6.28 (1H, d, *J* = 1.0 Hz, CHH). <sup>13</sup>C NMR (100 MHz, CDCl<sub>3</sub>) δ 152.8, 150.7, 149.3, 142.2, 132.8, 131.3, 129.8, 128.3, 128.2, 126.3, 122.3, 122.2, 121.3, 121.2, 112.3, 109.8, 106.4, 103.8. **HRMS** (ESI<sup>+</sup>): [M+H]<sup>+</sup> calcd for C<sub>19</sub>H<sub>11</sub>N<sub>2</sub>O<sub>7</sub><sup>+</sup> 379.0561, found 379.0563.

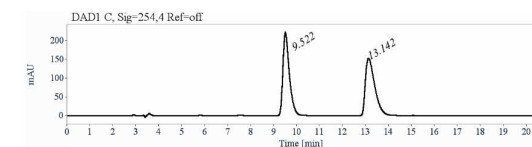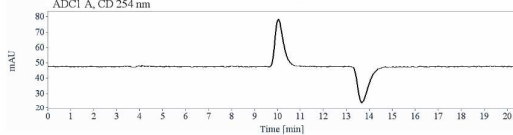

Signal: DAD1 B, Sig=220.4 Ref=off

| RT [min] | Area  | Area%  | Capacity Factor | Enantioselectivity | Resolution (USP) |
|----------|-------|--------|-----------------|--------------------|------------------|
| 9.52     | 16857 | 49.94  | 2.23            |                    |                  |
| 13.14    | 16895 | 50.06  | 3.45            | 1.55               | 5.89             |
| Sum      | 33752 | 100.00 |                 |                    |                  |

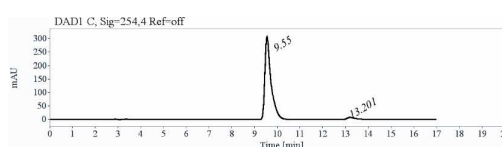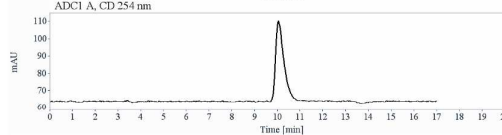

Signal: DAD1 B, Sig=220.4 Ref=off

| RT [min] | Area  | Area%  | Capacity Factor | Enantioselectivity | Resolution (USP) |
|----------|-------|--------|-----------------|--------------------|------------------|
| 9.55     | 22354 | 96.73  | 2.24            |                    |                  |
| 13.20    | 756   | 3.27   | 3.48            | 1.55               | 7.12             |
| Sum      | 23110 | 100.00 |                 |                    |                  |

**(*aS*)-2-nitro-1-(2-(trifluoromethyl)phenyl)naphtho[2,1-*b*]furan (10g).**

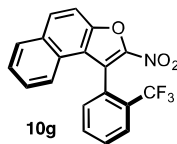

This compound was isolated as a yellow solid (113 mg, 83%); **mp** = 170–172 °C; **R<sub>f</sub>** = 0.27 (ethyl acetate/petroleum ether 1:9); **HPLC** (Lux-Cellulose-2, Heptane/ethanol = 90/10, flow rate = 1.0 mL/min, λ = 254 nm): *t*<sub>major</sub> = 7.63 min, *t*<sub>minor</sub> = 8.15 min, ee = 97%; **Chirality conversion percentage** = 100%; [α]<sub>D</sub><sup>25</sup> (CHCl<sub>3</sub>, *c* = 1.0) = +152; <sup>1</sup>H NMR (400 MHz, CDCl<sub>3</sub>) δ 8.06 (1H, d, *J* = 9.1 Hz, ArH), 8.01–7.95 (2H, m, ArH), 7.82–7.71 (3H, m, ArH), 7.55–7.49 (2H, m, ArH), 7.36 (1H, ddd, *J* = 8.5, 7.0, 1.3 Hz, ArH), 7.17 (1H, d, *J* = 8.4 Hz, ArH). <sup>13</sup>C NMR (100 MHz, CDCl<sub>3</sub>) δ 150.4, 148.4, 132.9, 132.8, 131.5, 130.6, 129.8, 129.7, 129 (q, *J* = 30.5 Hz), 128.4, 128.2, 127.1 (q, *J* = 5.1 Hz), 126.4, 125.1, 122.9, 122.4, 122.3, 120.9, 112.3. **HRMS** (ESI<sup>+</sup>): [M+H]<sup>+</sup> calcd for C<sub>19</sub>H<sub>11</sub>NO<sub>3</sub>F<sub>3</sub><sup>+</sup> 358.0686, found 358.0683.

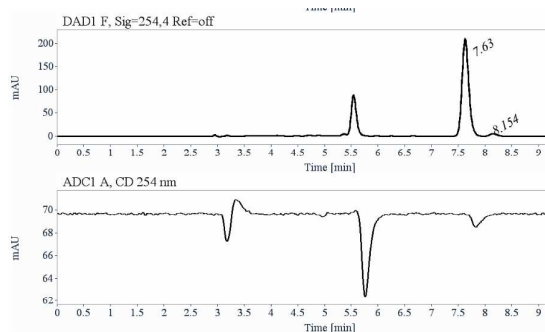

Signal: DAD1 D, Sig=220.4 Ref=off

| RT [min] | Area  | Area%  | Capacity Factor | Enantioselectivity | Resolution (USP) |
|----------|-------|--------|-----------------|--------------------|------------------|
| 7.63     | 9805  | 97.08  | 1.59            |                    |                  |
| 8.15     | 295   | 2.92   | 1.76            | 1.11               | 2.18             |
| Sum      | 10100 | 100.00 |                 |                    |                  |

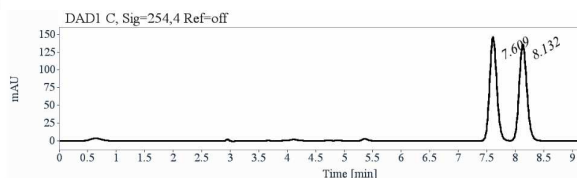

Signal: DAD1 B, Sig=220.4 Ref=off

| RT [min] | Area  | Area%  | Capacity Factor | Enantioselectivity | Resolution (USP) |
|----------|-------|--------|-----------------|--------------------|------------------|
| 7.61     | 6790  | 49.98  | 1.58            |                    |                  |
| 8.13     | 6796  | 50.02  | 1.76            | 1.11               | 2.18             |
| Sum      | 13586 | 100.00 |                 |                    |                  |

**(aS)-(2-(2-nitronaphtho[2,1-b]furan-1-yl)phenyl)diphenylphosphine oxide (10h).**

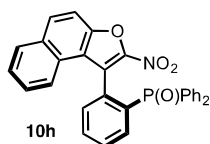

This compound was isolated as a dark green solid (65 mg, 85%); **mp** = 169-170 °C; **R<sub>f</sub>** = 0.22 (ethyl acetate/petroleum ether 1:1); **HPLC** (Lux-Cellulose-2, Heptane/ethanol = 50/50, flow rate = 1.0 mL/min,  $\lambda$  = 254 nm):  $t_{\text{major}}$  = 12.33 min,  $t_{\text{minor}}$  = 10.25 min, ee = 85%; **Chirality conversion percentage** = 89%;  $[\alpha]_{\text{D}}^{25}$  (CHCl<sub>3</sub>,  $c$  = 1.0) = +17; **<sup>1</sup>H NMR** (400 MHz, CDCl<sub>3</sub>)  $\delta$  7.90 (1H, d,  $J$  = 9.1 Hz, ArH), 7.87 (1H, d,  $J$  = 8.2 Hz, ArH), 7.80-7.71 (1H, m, ArH), 7.68-7.60 (2H, m, ArH), 7.59-7.37 (8H, m, ArH), 7.30-7.23 (3H, m, ArH), 7.18 (1H, d,  $J$  = 8.3 Hz, ArH), 7.15-7.09 (1H, m, ArH), 7.04-6.97 (2H, m, ArH). **<sup>13</sup>C NMR** (100 MHz, CDCl<sub>3</sub>)  $\delta$  149.8, 148.8, 135.4 (d,  $J$  = 6.7 Hz), 134.5 (d,  $J$  = 11.1 Hz), 132.7, 132.0 (d,  $J$  = 9.8 Hz), 131.9, 131.6 (d,  $J$  = 9.6 Hz), 131.4, 131.2, 130.9 (d,  $J$  = 9.2 Hz), 129.4, 129.0 (d,  $J$  = 12.0 Hz), 128.7, 128.3 (d,  $J$  = 12.2 Hz), 128.1 (d,  $J$  = 12.2 Hz), 127.5, 126.0, 123.4, 122.5, 122.1 (d,  $J$  = 4.3 Hz), 112.2. **<sup>31</sup>P NMR** (162 MHz, CDCl<sub>3</sub>)  $\delta$  26.8. **HRMS** (ESI<sup>+</sup>):  $[M+H]^+$  calcd for C<sub>30</sub>H<sub>21</sub>NO<sub>4</sub>P<sup>+</sup> 490.1203, found 490.1207.

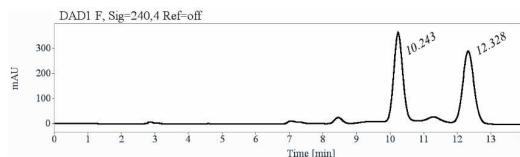

Signal: DAD1 D, Sig=230.4 Ref=off

| RT [min] | Area  | Area%  | Capacity Factor | Enantioselectivity | Resolution (USP) |
|----------|-------|--------|-----------------|--------------------|------------------|
| 10.24    | 19391 | 49.76  | 2.47            |                    |                  |
| 12.33    | 19579 | 50.24  | 3.18            | 1.29               | 3.79             |
| Sum      | 38970 | 100.00 |                 |                    |                  |

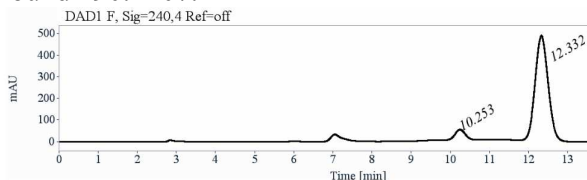

Signal: DAD1 D, Sig=230.4 Ref=off

| RT [min] | Area  | Area%  | Capacity Factor | Enantioselectivity | Resolution (USP) |
|----------|-------|--------|-----------------|--------------------|------------------|
| 10.25    | 2611  | 7.30   | 2.48            |                    |                  |
| 12.33    | 33176 | 92.70  | 3.18            | 1.28               | 3.78             |
| Sum      | 35786 | 100.00 |                 |                    |                  |

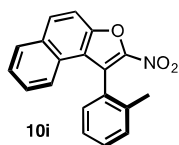

**(aS)-2-nitro-1-(o-tolyl)naphtho[2,1-b]furan (10i).** This compound was isolated as a yellow solid (113 mg, 83%); **mp** = 140-142 °C; **R<sub>f</sub>** = 0.57 (ethyl acetate/petroleum ether 1:9); **HPLC** (Lux-Cellulose-2, Heptane/isopropanol = 95/5, flow rate = 1.0 mL/min,  $\lambda$  = 254 nm):  $t_{\text{major}}$  = 9.78 min,  $t_{\text{minor}}$  = 11.60 min, ee = 92%; **Chirality conversion percentage** = 100%;  $[\alpha]_{\text{D}}^{25}$  (CHCl<sub>3</sub>,  $c$  = 1.0) = -36; **<sup>1</sup>H NMR** (400 MHz, CDCl<sub>3</sub>)  $\delta$  8.06 (1H, d,  $J$  = 9.1 Hz, ArH), 7.97 (1H, d,  $J$  = 8.3 Hz, ArH), 7.76 (1H, d,  $J$  = 9.1 Hz, ArH), 7.55-7.45 (3H, m, ArH), 7.43-7.33 (4H, m, ArH), 2.17 (3H, s, CH<sub>3</sub>). **<sup>13</sup>C NMR** (100 MHz, CDCl<sub>3</sub>)  $\delta$  150.6, 148.2, 136.7, 132.8, 131.3, 130.7, 130.0, 129.7, 128.9, 128.3, 126.7, 126.3, 124.1, 122.6, 121.7, 112.4, 20.0. **HRMS** (ESI<sup>+</sup>):  $[M+H]^+$  calcd for C<sub>19</sub>H<sub>14</sub>NO<sub>3</sub><sup>+</sup> 304.0968, found 304.0969.

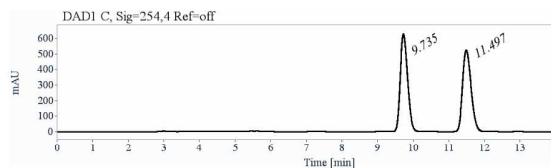

Signal: DAD1 C, Sig=254.4 Ref=off

| RT [min] | Area  | Area%  | Capacity Factor | Enantioselectivity | Resolution (USP) |
|----------|-------|--------|-----------------|--------------------|------------------|
| 9.73     | 9015  | 50.72  | 2.30            |                    |                  |
| 11.50    | 8759  | 49.28  | 2.90            | 1.26               | 4.28             |
| Sum      | 17774 | 100.00 |                 |                    |                  |

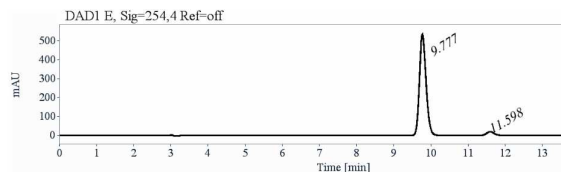

Signal: DAD1 E, Sig=254.4 Ref=off

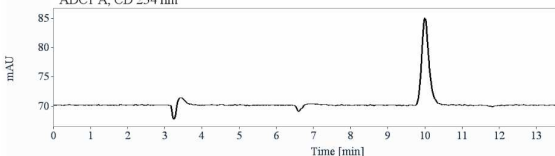

Signal: DAD1 E, Sig=254.4 Ref=off

| RT [min] | Area | Area%  | Capacity Factor | Enantioselectivity | Resolution (USP) |
|----------|------|--------|-----------------|--------------------|------------------|
| 9.78     | 6609 | 95.96  | 2.31            |                    |                  |
| 11.60    | 278  | 4.04   | 2.93            | 1.27               | 5.18             |
| Sum      | 6887 | 100.00 |                 |                    |                  |

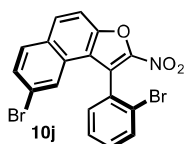

**(aS)-8-bromo-1-(2-bromophenyl)-2-nitronaphtho[2,1-b]furan (10j).**

This compound was isolated as a dark-green solid (48 mg, 98%); **mp** = 233-234 °C; **R<sub>f</sub>** = 0.50 (ethyl acetate/petroleum ether 1:9); **HPLC** (Lux-Cellulose-4, Heptane/isopropanol = 80/20, flow rate = 1.0 mL/min,  $\lambda$  = 254 nm):  $t_{\text{major}}$  = 6.57 min,  $t_{\text{minor}}$  = 7.58 min, ee = 95%; **Chirality conversion percentage** = 100%;  $[\alpha]_{\text{D}}^{25}$  (CHCl<sub>3</sub>,  $c$  = 1.0) = -17; **<sup>1</sup>H NMR** (400 MHz, CDCl<sub>3</sub>)  $\delta$  8.02 (1H, d,  $J$  = 9.1 Hz, ArH), 7.88 (1H, dd,  $J$  = 7.9, 1.3 Hz, ArH), 7.83 (1H, d,  $J$  = 8.7 Hz, ArH), 7.77 (1H, d,  $J$  = 9.1 Hz, ArH), 7.64-7.59 (1H, m, ArH), 7.57 (1H, dd,  $J$  = 7.5, 1.3 Hz, ArH), 7.54-7.44 (3H, m, ArH). **<sup>13</sup>C NMR** (100 MHz, CDCl<sub>3</sub>)  $\delta$  150.6, 148.1, 133.4, 132.2, 131.1, 131.1, 131.0, 130.5, 129.7, 129.6, 129.5, 128.2, 125.3, 123.3, 122.7, 122.6, 120.5, 112.7. **HRMS** (ESI<sup>+</sup>):  $[M+H]^+$  calcd for C<sub>18</sub>H<sub>10</sub>NO<sub>3</sub>Br<sub>2</sub><sup>+</sup> 447.9003, found 447.9004.

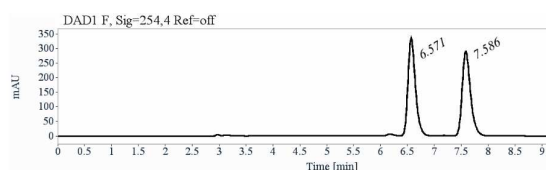

Signal: DAD1 D, Sig=220.4 Ref=off

| RT [min] | Area  | Area%  | Capacity Factor | Enantioselectivity | Resolution (USP) |
|----------|-------|--------|-----------------|--------------------|------------------|
| 6.57     | 19076 | 50.48  | 1.23            |                    |                  |
| 7.59     | 18711 | 49.52  | 1.57            | 1.28               | 3.86             |
| Sum      | 37787 | 100.00 |                 |                    |                  |

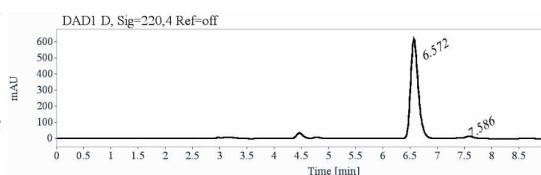

Signal: DAD1 D, Sig=220.4 Ref=off

| RT [min] | Area | Area%  | Capacity Factor | Enantioselectivity | Resolution (USP) |
|----------|------|--------|-----------------|--------------------|------------------|
| 6.57     | 5956 | 97.44  | 1.23            |                    |                  |
| 7.59     | 156  | 2.56   | 1.57            | 1.28               | 3.78             |
| Sum      | 6112 | 100.00 |                 |                    |                  |

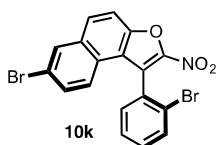

**(aS)-7-bromo-1-(2-bromophenyl)-2-nitronaphtho[2,1-b]furan (10k).**

This compound was isolated as a dark-green solid (47 mg, 96%); **mp** = 168-169 °C; **R<sub>f</sub>** = 0.47 (ethyl acetate/petroleum ether 1:9); **HPLC** (Lux-Cellulose-4, Heptane/isopropanol = 80/20, flow rate = 1.0 mL/min,  $\lambda$  = 254 nm):  $t_{\text{major}}$  = 6.63 min,  $t_{\text{minor}}$  = 7.48 min, ee = 92%; **Chirality conversion percentage** = 97%;  $[\alpha]_{\text{D}}^{25}$  (CHCl<sub>3</sub>,  $c$  = 1.0) = -52; **<sup>1</sup>H NMR** (400 MHz, CDCl<sub>3</sub>)  $\delta$  8.13 (1H, d,  $J$  = 2.1 Hz, ArH), 7.96 (1H, d,  $J$  = 9.1 Hz, ArH), 7.85 (1H, dd,  $J$  = 7.9, 1.5 Hz, ArH), 7.79 (1H, d,  $J$  = 9.1 Hz, ArH), 7.58-7.44 (4H, m, ArH), 7.23 (1H, d,  $J$  = 9.1 Hz, ArH). **<sup>13</sup>C NMR** (100 MHz, CDCl<sub>3</sub>)  $\delta$  150.4, 148.3, 133.6, 132.7, 131.8, 131.7, 131.6, 131.5, 131.3, 130.7, 128.4, 127.2,

124.3, 123.5, 122.7, 121.6, 120.4, 113.7. **HRMS** (ESI<sup>+</sup>): [M+H]<sup>+</sup> calcd for C<sub>18</sub>H<sub>10</sub>NO<sub>3</sub>Br<sub>2</sub><sup>+</sup> 447.9003, found 447.9000.

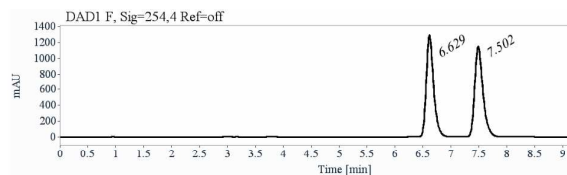

| RT [min] | Area  | Area%  | Capacity Factor | Enantioselectivity | Resolution (USP) |
|----------|-------|--------|-----------------|--------------------|------------------|
| 6.63     | 11760 | 49.99  | 1.25            |                    |                  |
| 7.50     | 11765 | 50.01  | 1.54            | 1.24               | 3.54             |
| Sum      | 23524 | 100.00 |                 |                    |                  |

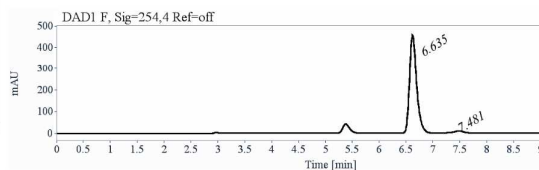

| RT [min] | Area | Area%  | Capacity Factor | Enantioselectivity | Resolution (USP) |
|----------|------|--------|-----------------|--------------------|------------------|
| 6.63     | 4221 | 96.12  | 1.25            |                    |                  |
| 7.48     | 170  | 3.88   | 1.54            | 1.23               | 2.95             |
| Sum      | 4391 | 100.00 |                 |                    |                  |

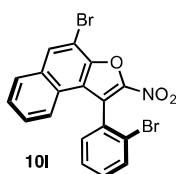

**(aS)-4-bromo-1-(2-bromophenyl)-2-nitronaphtho[2,1-b]furan (10l).**

This compound was isolated as a dark-green solid (48 mg, 96%); **mp** = 246-247 °C; **R<sub>f</sub>** = 0.47 (ethyl acetate/petroleum ether 1:9); **HPLC** (Lux-Cellulose-4, Heptane/isopropanol = 80/20, flow rate = 1.0 mL/min, λ = 254 nm): *t*<sub>major</sub> = 8.29 min, *t*<sub>minor</sub> = 10.13 min, **ee** = 98%; **Chirality conversion percentage** = 100%; [α]<sub>D</sub><sup>25</sup> (CHCl<sub>3</sub>, *c* = 1.0) = -29; **<sup>1</sup>H NMR** (400 MHz, CDCl<sub>3</sub>) δ 8.25 (1H, s, ArH), 7.91 (1H, d, *J* = 8.2 Hz, ArH), 7.86 (1H, dd, *J* = 7.9, 1.2 Hz, ArH), 7.60-7.39 (5H, m, ArH), 7.33 (1H, d, *J* = 8.2 Hz, ArH). **<sup>13</sup>C NMR** (100 MHz, CDCl<sub>3</sub>) δ 148.3, 147.5, 134.4, 133.6, 132.4, 131.6, 131.4, 130.7, 128.9, 128.6, 128.4, 127.8, 127.2, 123.5, 123.3, 122.9, 122.5, 104.6. **HRMS** (ESI<sup>+</sup>): [M+H]<sup>+</sup> calcd for C<sub>18</sub>H<sub>10</sub>NO<sub>3</sub>Br<sub>2</sub><sup>+</sup> 447.9003, found 447.8999.

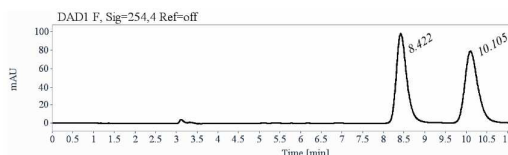

| RT [min] | Area  | Area%  | Capacity Factor | Enantioselectivity | Resolution (USP) |
|----------|-------|--------|-----------------|--------------------|------------------|
| 8.42     | 12316 | 50.13  | 1.85            |                    |                  |
| 10.11    | 12251 | 49.87  | 2.43            | 1.31               | 3.27             |
| Sum      | 24568 | 100.00 |                 |                    |                  |

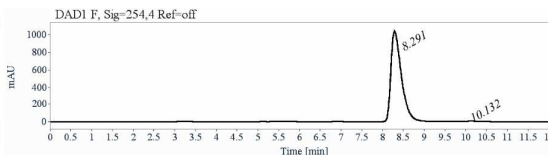

| RT [min] | Area  | Area%  | Capacity Factor | Enantioselectivity | Resolution (USP) |
|----------|-------|--------|-----------------|--------------------|------------------|
| 8.29     | 18374 | 99.23  | 1.81            |                    |                  |
| 10.13    | 143   | 0.77   | 2.43            | 1.34               | 3.45             |
| Sum      | 18518 | 100.00 |                 |                    |                  |

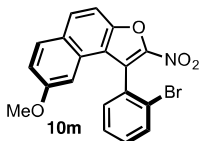

**(aS)-1-(2-bromophenyl)-8-methoxy-2-nitronaphtho[2,1-b]furan (10m).** This compound was isolated as a dark-green solid (51 mg, 98%); **mp** = 181-182 °C; **R<sub>f</sub>** = 0.40 (ethyl acetate/petroleum ether 1:9); **HPLC** (Lux-Cellulose-4, Heptane/isopropanol = 80/20, flow rate = 1.0 mL/min, λ = 254 nm): *t*<sub>major</sub> = 7.45 min, *t*<sub>minor</sub> = 8.65 min, **ee** = 95%; **Chirality conversion percentage** = 99%; [α]<sub>D</sub><sup>25</sup> (CHCl<sub>3</sub>, *c* = 1.0) = -6; **<sup>1</sup>H NMR** (400 MHz, CDCl<sub>3</sub>) δ 7.97 (1H, d, *J* = 9.0 Hz, ArH), 7.89-7.82 (2H, m, ArH), 7.62-7.42 (4H, m, ArH), 7.14 (1H, dd, *J* = 9.0, 2.5 Hz, ArH). **<sup>13</sup>C NMR** (100 MHz, CDCl<sub>3</sub>) δ 159.5, 151.3, 147.9, 133.4, 132.5, 132.4, 131.1, 131.0, 130.9, 130.2, 128.2, 126.2, 123.7, 123.2, 120.8, 118.2, 109.7, 102.4, 55.0. **HRMS** (ESI<sup>+</sup>): [M+H]<sup>+</sup> calcd for C<sub>19</sub>H<sub>13</sub>NO<sub>4</sub>Br<sup>+</sup> 398.0022, found 398.0023.

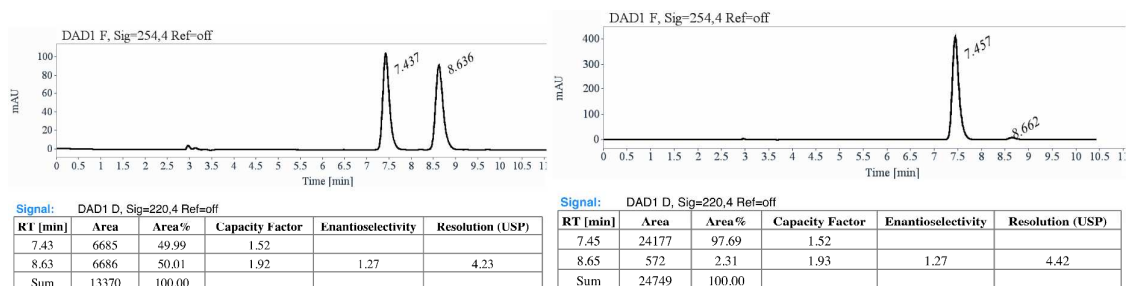

## 6. Enantiomerisation barrier determination.

The enantiomerisation barrier, corresponding to barrier to rotation for the following atropisomers, was obtained by kinetic of racemisation of an enantiomer. The slope of the first-order kinetic line gives the racemisation constant ( $k_{\text{racemisation}} = 2 \times k_{\text{enantiomerisation}}$ ). Eyring equation gives the enantiomerisation barrier ( $\Delta G^{\ddagger}_{\text{enantiomerisation}}$ ) from enantiomerisation constant ( $k_{\text{enantiomerisation}}$ ),  $R = 8.31451 \text{ J.K}^{-1} \cdot \text{mol}^{-1}$ ,  $h = 6.62608 \cdot 10^{-34} \text{ J.s}$  and  $k_B = 1.38066 \cdot 10^{-23} \text{ J.K}^{-1}$ .

The calculated values of  $\Delta G^{\ddagger}_{\text{enantiomerisation}}$  are  $\pm 0.5 \text{ kJ/mol}$ .

The half-life time  $t_{1/2}$ , given in the following pages of supplementary material, is  $t_{1/2}$  at the temperature used for the kinetic. The half-life time  $t_{1/2}$ , given in the article, is the half-life time at  $25^{\circ}\text{C}$ , calculated with the hypothesis that the enantiomerisation barrier  $\Delta G^{\ddagger}_{\text{enantiomerisation}}$  is independent of temperature.

### Enantiomerisation barrier for (4a)

About 3 mg of enantio-enriched (**4a**) were refluxed in 15 mL of ethanol. Samples of 10  $\mu$ L of this solution were injected on Chiralpak IC (heptane / ethanol 70/30, 1 mL/min, UV detection at 254 nm) to monitor the percentage decrease of the second eluted enantiomer over time.

Solvent : ethanol

Temperature = 78.29 °C

| Time (min) | % second eluted enantiomer (%t) | $\ln ((\%t-50)/(\%0-50))$ |
|------------|---------------------------------|---------------------------|
| 0          | 99.210                          | 0.0000                    |
| 142        | 95.280                          | -0.0832                   |
| 1110       | 74.730                          | -0.6881                   |

k racemisation =  $1.03617\text{E-}05 \text{ s}^{-1}$

k enantiomerisation =  $5.1808\text{E-}06 \text{ s}^{-1}$

$\Delta G^\ddagger$  enantiomerisation =  $122.12 \text{ kJ.mol}^{-1}$

$29.22 \text{ kcal.mol}^{-1}$

half-life time  $t_{1/2}$  = 66895 seconds

1114.92 minutes

18.58 hours

0.77 days

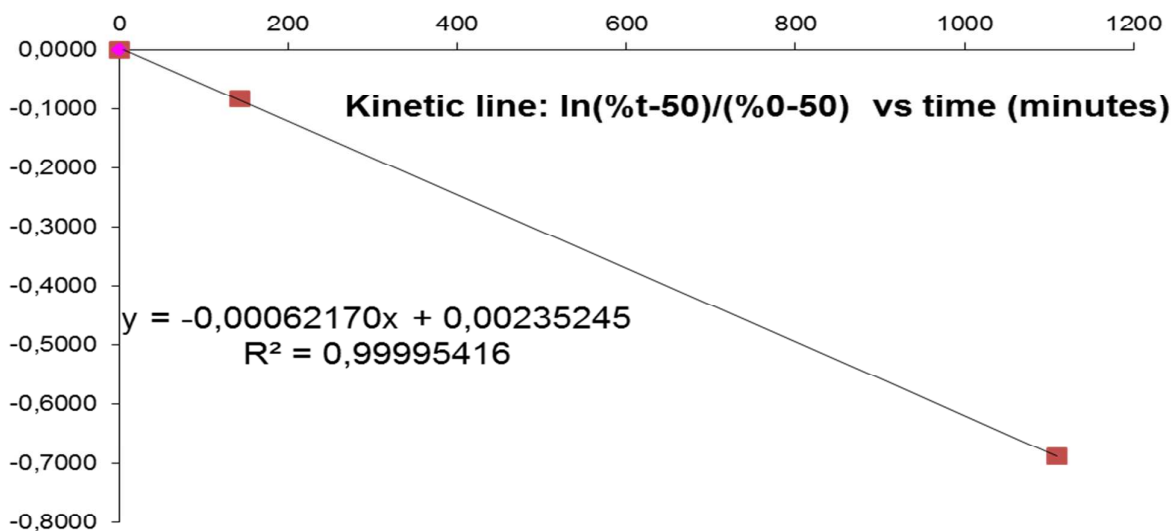

### Enantiomerisation barrier for (4b)

About 3 mg of enantio-enriched (**4b**) were refluxed in 15 mL of ethanol. Samples of 10  $\mu$ L of this solution were injected on Lux-Cellulose-2 (heptane / ethanol 50/50, 1 mL/min, UV detection at 254 nm) to monitor the percentage decrease of the second eluted enantiomer over time.

Solvent : ethanol  
Temperature = 78.29 °C

| Time (min) | % second eluted enantiomer (%t) | $\ln ((\%t-50)/(\%0-50))$ |
|------------|---------------------------------|---------------------------|
| 0.00       | 91.08                           | 0.0000                    |
| 15.00      | 90.73                           | -0.0086                   |
| 62.00      | 89.54                           | -0.0382                   |
| 160.00     | 87.23                           | -0.0984                   |
| 297.00     | 84.23                           | -0.1824                   |
| 1304.00    | 67.73                           | -0.8403                   |

k racemisation = 1.07597E-05 s<sup>-1</sup>  
k enantiomerisation = 5.3799E-06 s<sup>-1</sup>  
 $\Delta G^\ddagger$  enantiomerisation = 122.01 kJ.mol<sup>-1</sup>  
29.19 kcal.mol<sup>-1</sup>  
half-life time  $t_{1/2}$  = 64420 seconds  
1073.67 minutes  
17.89 hours  
0.75 days

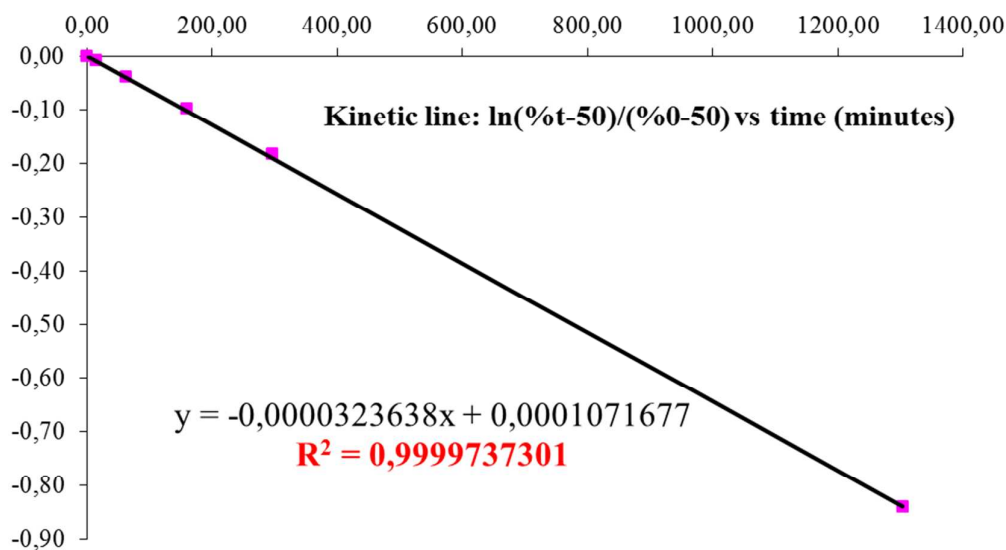

### Enantiomerisation barrier for (4c)

About 3 mg of enantio-enriched (**4c**) were refluxed in 15 mL of ethanol. Samples of 10  $\mu$ L of this solution were injected on Chiralpak AZ-H (heptane / ethanol 50/50, 1 mL/min, UV detection at 254 nm) to monitor the percentage decrease of the second eluted enantiomer over time.

Solvent : ethanol  
Temperature = 78.29 °C

| Time (min) | % second eluted enantiomer (%t) | $\ln ((\%t-50)/(\%0-50))$ |
|------------|---------------------------------|---------------------------|
| 0          | 94.34                           | 0.0000                    |
| 16         | 94.17                           | -0.0038                   |
| 57         | 93.84                           | -0.0113                   |
| 175        | 92.97                           | -0.0314                   |
| 350        | 91.22                           | -0.0730                   |
| 1340       | 83.30                           | -0.2863                   |
| 1804       | 80.14                           | -0.3860                   |
| 2777       | 74.55                           | -0.5912                   |

k racemisation = 3.56395E-06 s<sup>-1</sup>  
k enantiomerisation = 1.7820E-06 s<sup>-1</sup>  
 $\Delta G^\ddagger$  enantiomerisation = **125.24** kJ.mol<sup>-1</sup>  
29.96 kcal.mol<sup>-1</sup>  
half-life time t<sub>1/2</sub> = 194488 seconds  
3241.47 minutes  
54.02 hours  
2.25 days

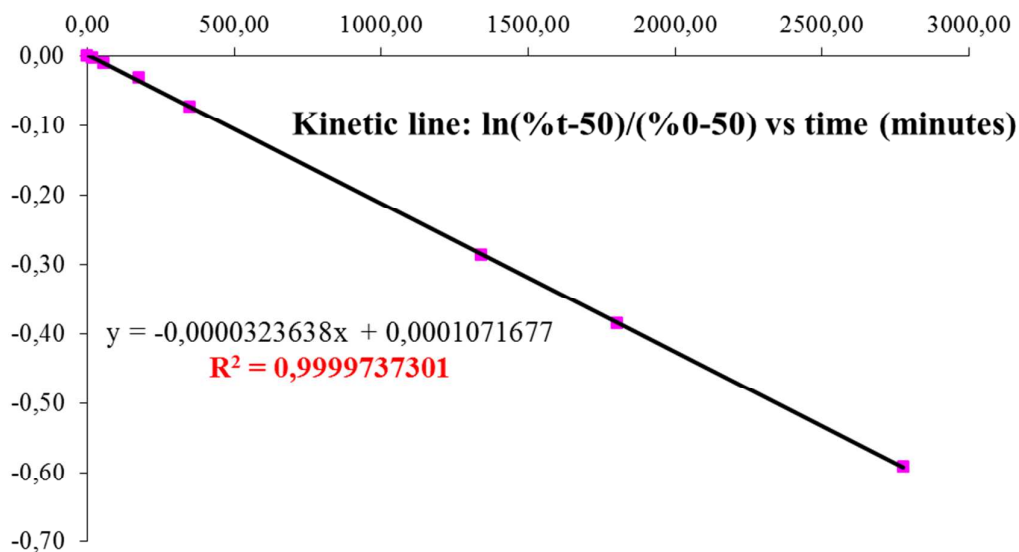

### Enantiomerisation barrier for (4d)

About 3 mg of enantio-enriched (**4d**) were refluxed in 15 mL of ethanol. Samples of 10  $\mu$ L of this solution were injected on Lux-Cellulose-2 (heptane / ethanol 50/50, 1 mL/min, UV detection at 220 nm) to monitor the percentage decrease of the second eluted enantiomer over time.

Solvent : ethanol  
Temperature = 78.29 °C

| Time (min) | % second eluted enantiomer (%t) | $\ln ((\%t-50)/(\%0-50))$ |
|------------|---------------------------------|---------------------------|
| 0          | 90.03                           | 0.0000                    |
| 30         | 89.95                           | -0.0020                   |
| 247        | 87.86                           | -0.0557                   |
| 1340       | 76.66                           | -0.4065                   |
| 1811       | 72.18                           | -0.5904                   |

k racemisation = 5.41033E-06 s<sup>-1</sup>  
k enantiomerisation = 2.7052E-06 s<sup>-1</sup>  
 $\Delta G^\ddagger$  enantiomerisation = **123.91** kJ.mol<sup>-1</sup>  
29.64 kcal.mol<sup>-1</sup>  
half-life time t<sub>1/2</sub> = 128115 seconds  
2135.26 minutes  
35.59 hours  
1.48 days

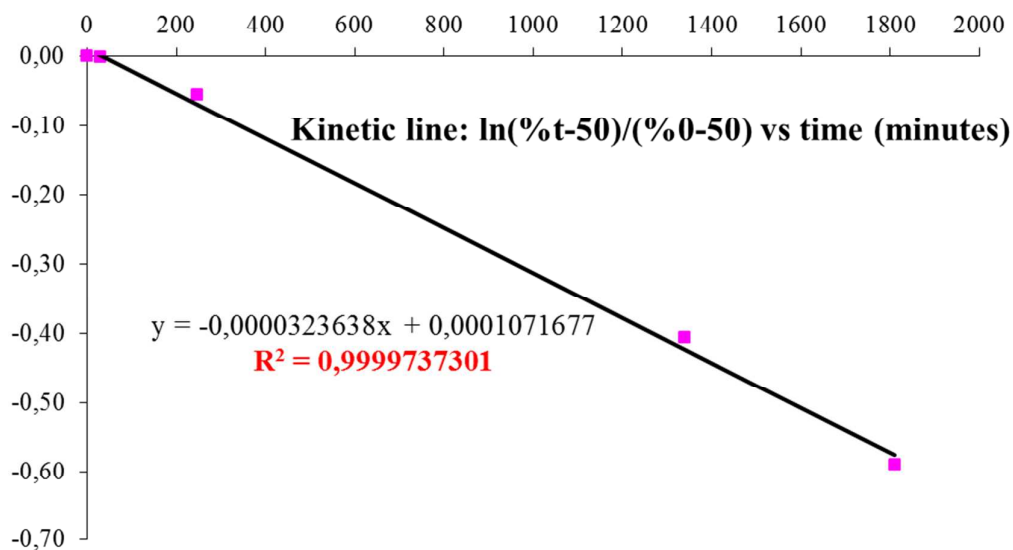

### Enantiomerisation barrier for (4e)

About 3 mg of enantio-enriched (**4e**) were refluxed in 15 mL of chlorobenzene. Samples of 10  $\mu\text{L}$  of this solution were injected on Chiralpak IB (heptane / ethanol/ chloroform 50/40/10, 1 mL/min, UV detection at 290 nm) to monitor the percentage decrease of the second eluted enantiomer over time.

Solvent : chlorobenzene  
Temperature = 131 °C

| Time (min) | % second eluted enantiomer (%t) | $\ln ((\%t-50)/(\%0-50))$ |
|------------|---------------------------------|---------------------------|
| 0          | 89.64                           | 0.0000                    |
| 12         | 87.71                           | -0.0499                   |
| 24         | 85.89                           | -0.0994                   |
| 36         | 84.03                           | -0.1526                   |
| 50         | 82.34                           | -0.2035                   |
| 73         | 79.49                           | -0.2958                   |
| 110        | 74.91                           | -0.4646                   |
| 141        | 72.59                           | -0.5623                   |
| 168        | 69.88                           | -0.6901                   |

k racemisation = 6.79291E-05  $\text{s}^{-1}$   
k enantiomerisation = 3.3965E-05  $\text{s}^{-1}$   
 $\Delta G^\ddagger$  enantiomerisation = **134.59**  $\text{kJ.mol}^{-1}$   
32.20  $\text{kcal.mol}^{-1}$   
half-life time  $t_{1/2}$  = 10204 seconds  
170.07 minutes  
2.83 hours  
0.12 days

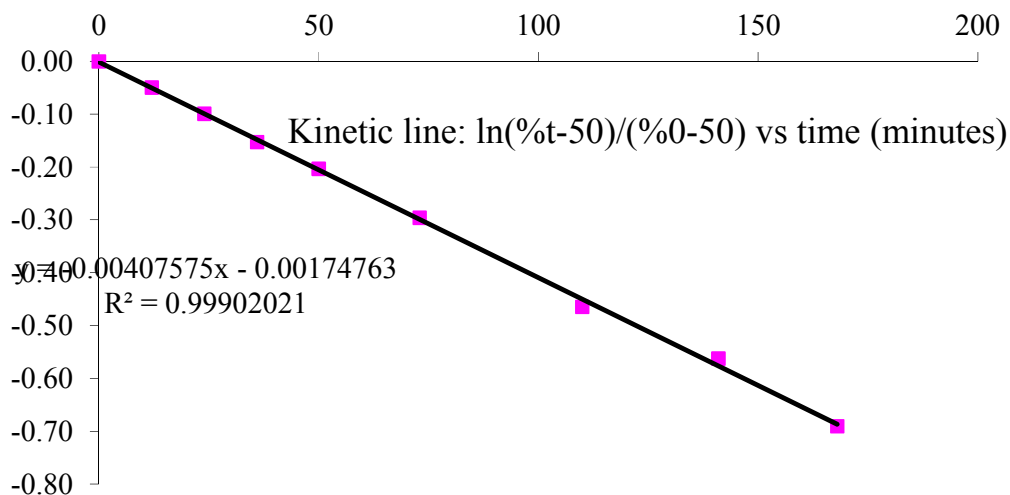

### Enantiomerisation barrier for (10a)

About 3 mg of enantio-enriched (**10a**) were refluxed in 15 mL of ethanol. Samples of 10  $\mu$ L of this solution were injected on Lux-Cellulose-2 (heptane / ethanol 80/20, 1 mL/min, UV detection at 220 nm) to monitor the percentage decrease of the second eluted enantiomer over time.

Solvent : ethanol  
Temperature = 78.29 °C

| Time (min) | % second eluted enantiomer (%t) | $\ln ((\%t-50)/(\%0-50))$ |
|------------|---------------------------------|---------------------------|
| 0          | 99.02                           | 0                         |
| 55         | 97.78                           | -0.025621236              |
| 132        | 95.88                           | -0.066199086              |
| 212        | 93.94                           | -0.109403311              |

k racemisation = 8.64105E-06 s<sup>-1</sup>  
k enantiomerisation = 4.3205E-06 s<sup>-1</sup>  
 $\Delta G^\ddagger$  enantiomerisation = **122.64** kJ.mol<sup>-1</sup>  
29.34 kcal.mol<sup>-1</sup>  
half-life time  $t_{1/2}$  = 80216 seconds  
1336.93 minutes  
22.28 hours  
0.928421669 days

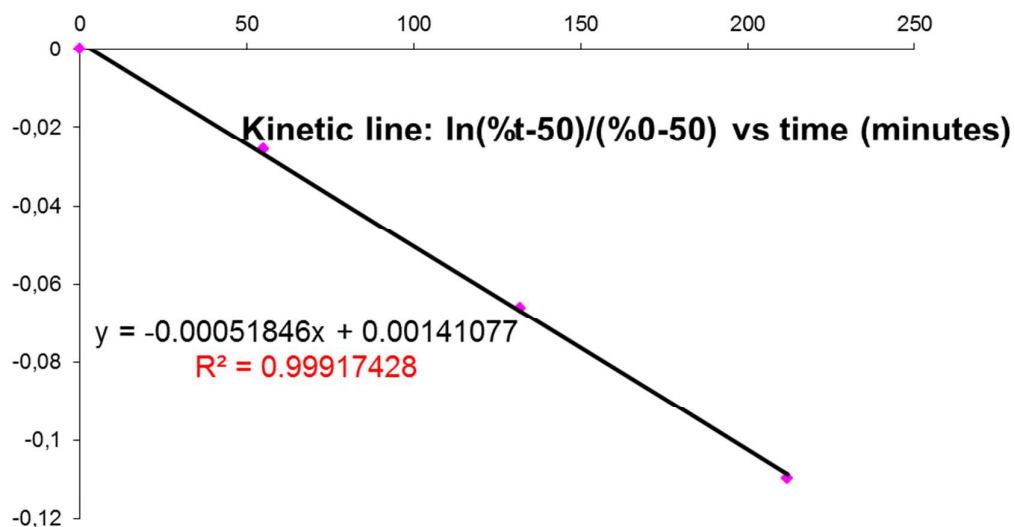

### Enantiomerisation barrier for (10b)

About 3 mg of enantio-enriched (**10b**) were refluxed in 15 mL of ethanol. Samples of 10  $\mu$ L of this solution were injected on Lux-Cellulose-2 (heptane / ethanol 80/20, 1 mL/min, UV detection at 205 nm) to monitor the percentage decrease of the second eluted enantiomer over time.

Solvent : ethanol

Temperature = 78.29 °C

| Time (min) | % second eluted enantiomer (%t) | ln ((%t-50)/(%0-50)) |
|------------|---------------------------------|----------------------|
| 0          | 93.89                           | 0                    |
| 13         | 90.09                           | -0.090559577         |
| 26         | 86.65                           | -0.180273075         |
| 39         | 83.49                           | -0.270439617         |
| 52         | 80.63                           | -0.359706583         |
| 65         | 78.03                           | -0.448411139         |
| 78         | 75.63                           | -0.537922963         |
| 91         | 73.42                           | -0.628096146         |

k racemisation =  $1.14884\text{E-}04 \text{ s}^{-1}$

k enantiomerisation =  $5.7442\text{E-}05 \text{ s}^{-1}$

$\Delta G^\ddagger$  enantiomerisation = **115.08** kJ.mol<sup>-1</sup>

27.53 kcal.mol<sup>-1</sup>

half-life time  $t_{1/2}$  = 6033 seconds

100.56 minutes

1.68 hours

0.069831894 days

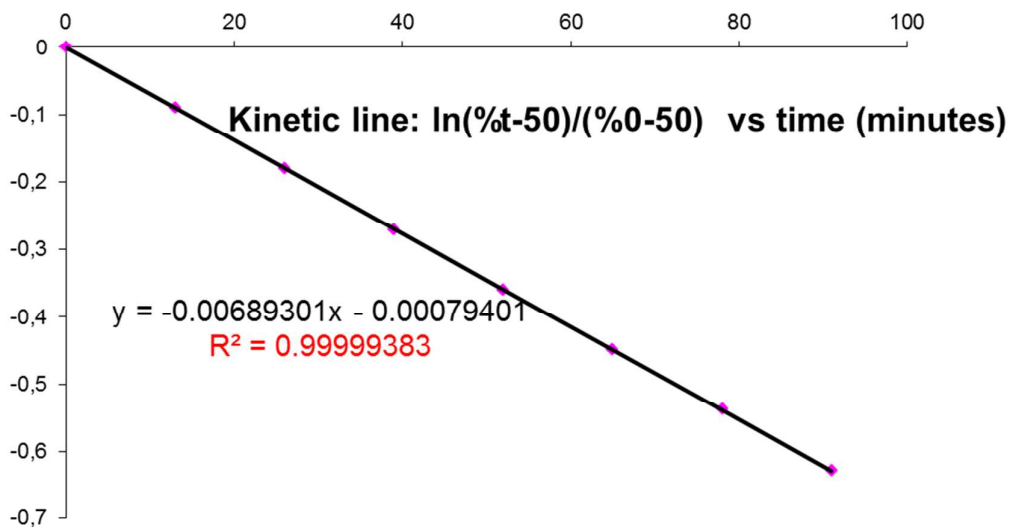

### Enantiomerisation barrier for (10c)

About 3 mg of enantio-enriched (**10c**) were refluxed in 15 mL of chlorobenzene. Samples of 10  $\mu\text{L}$  of this solution were injected on Chiralpak IC (heptane / isopropanol 95/5, 1 mL/min, UV detection at 300 nm) to monitor the percentage decrease of the second eluted enantiomer over time.

Solvent : chlorobenzene  
Temperature = 131  $^{\circ}\text{C}$

| Time (min) | % second eluted enantiomer (%t) | $\ln ((\%t-50)/(\%0-50))$ |
|------------|---------------------------------|---------------------------|
| 0          | 89.77                           | 0.0000                    |
| 19         | 84.22                           | -0.1503                   |
| 37         | 79.78                           | -0.2893                   |
| 55         | 75.64                           | -0.4390                   |
| 74         | 71.84                           | -0.5994                   |

k racemisation = 0.000134734  $\text{s}^{-1}$   
k enantiomerisation = 6.7367E-05  $\text{s}^{-1}$   
 $\Delta G^{\ddagger}$  enantiomerisation = **132.29**  $\text{kJ.mol}^{-1}$   
31.65  $\text{kcal.mol}^{-1}$   
half-life time  $t_{1/2}$  = 5145 seconds  
85.74 minutes  
1.43 hours  
0.06 days

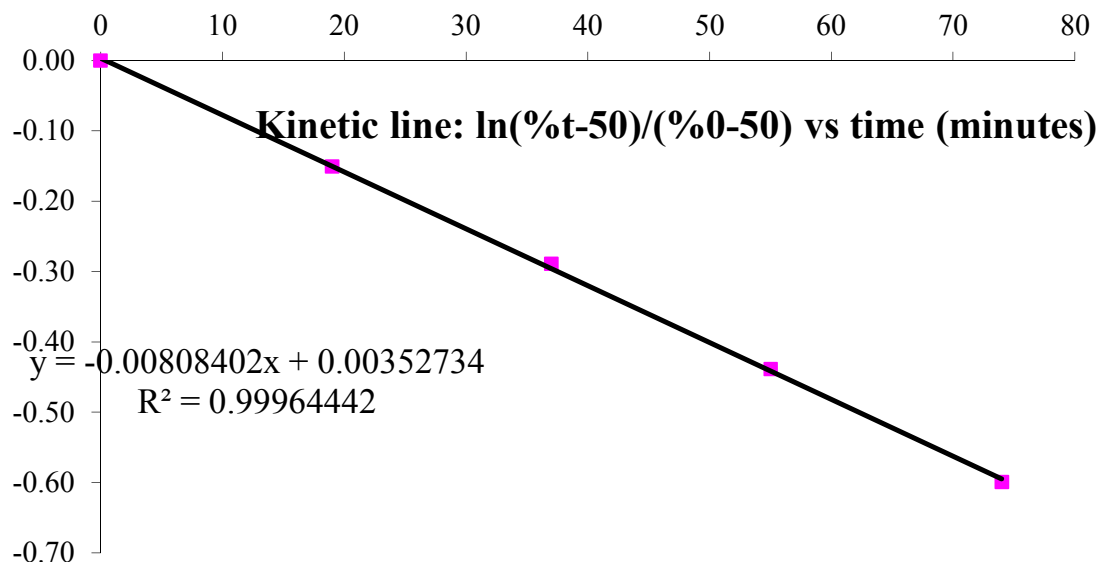

### Enantiomerisation barrier for (10d)

About 3 mg of enantio-enriched (**10d**) were refluxed in 15 mL of ethanol. Samples of 10  $\mu$ L of this solution were injected on Lux-Cellulose-4 (heptane / ethanol 60/40, 1 mL/min, UV detection at 220 nm) to monitor the percentage decrease of the second eluted enantiomer over time.

Solvent : ethanol  
Temperature = 78.29 °C

| Time (min) | % second eluted enantiomer (%t) | $\ln ((\%t-50)/(\%0-50))$ |
|------------|---------------------------------|---------------------------|
| 0          | 86.4                            | 0                         |
| 10         | 76.66                           | -0.31140446               |
| 22         | 68.14                           | -0.69644933               |
| 26         | 66.1                            | -0.815749503              |
| 33         | 62.87                           | -1.039669753              |

k racemisation = 5.25475E-04 s<sup>-1</sup>  
k enantiomerisation = 2.6274E-04 s<sup>-1</sup>  
 $\Delta G^\ddagger$  enantiomerisation = **110.64** kJ.mol<sup>-1</sup>  
26.47 kcal.mol<sup>-1</sup>  
half-life time t<sub>1/2</sub> = 1319 seconds  
21.98 minutes  
0.37 hours  
0.015267206 days

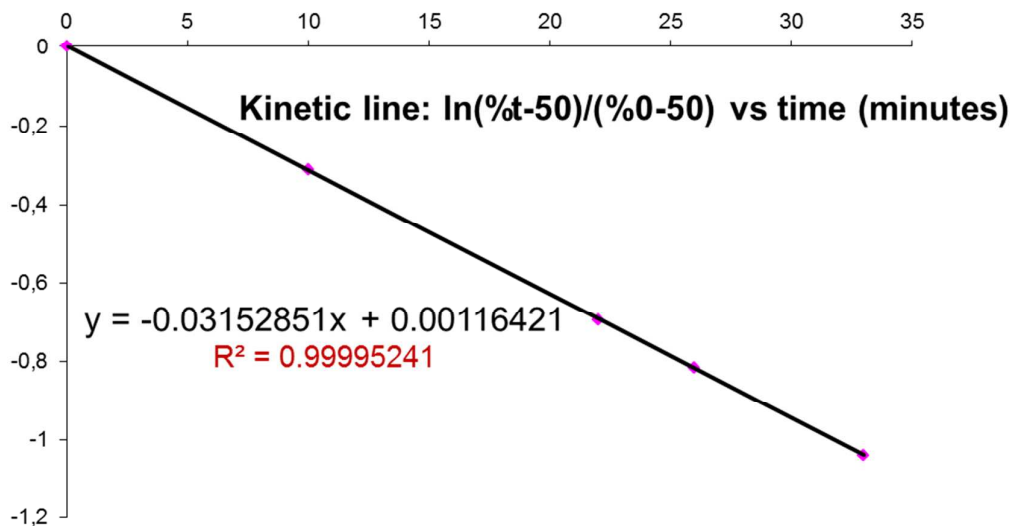

### Enantiomerisation barrier for (10e)

About 3 mg of enantio-enriched (**10e**) were refluxed in 15 mL of ethanol. Samples of 10  $\mu$ L of this solution were injected on Chiralpak IC (heptane / ethanol 80/20, 1 mL/min, UV detection at 254 nm) to monitor the percentage decrease of the second eluted enantiomer over time.

Solvent : ethanol  
Temperature = 78.29 °C

| Time (min) | % second eluted enantiomer (%t) | $\ln ((\%t-50)/(\%0-50))$ |
|------------|---------------------------------|---------------------------|
| 0          | 88.68                           | 0                         |
| 15         | 78.29                           | -0.312814285              |
| 30         | 70.74                           | -0.623258468              |
| 44         | 65.52                           | -0.913193156              |

k racemisation = 3.45814E-04 s<sup>-1</sup>  
k enantiomerisation = 1.7291E-04 s<sup>-1</sup>  
 $\Delta G^\ddagger$  enantiomerisation = **111.86** kJ.mol<sup>-1</sup>  
26.76 kcal.mol<sup>-1</sup>  
half-life time  $t_{1/2}$  = 2004 seconds  
33.41 minutes  
0.56 hours  
0.023199002 days

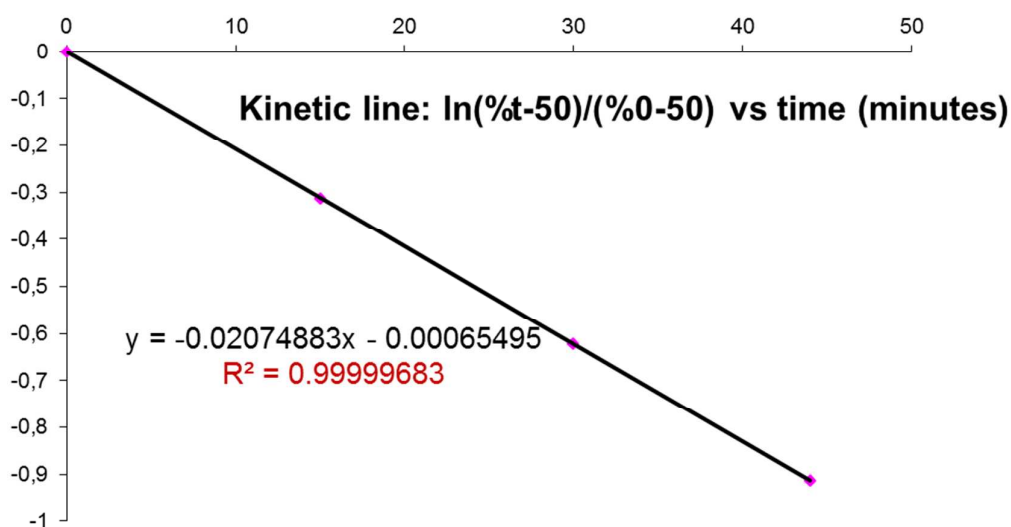

### Enantiomerisation barrier for (10f)

About 3 mg of enantio-enriched (10f) were refluxed in 15 mL of ethanol. Samples of 10  $\mu$ L of this solution were injected on Chiralpak IB (heptane / ethanol 80/20, 1 mL/min, UV detection at 220 nm) to monitor the percentage decrease of the second eluted enantiomer over time.

Solvent : ethanol  
Temperature = 78.29 °C

| Time (min) | % second eluted enantiomer (%t) | $\ln ((\%t-50)/(\%0-50))$ |
|------------|---------------------------------|---------------------------|
| 0          | 96.18                           | 0.0000                    |
| 15         | 92.51                           | -0.0828                   |
| 39         | 87.18                           | -0.2168                   |
| 54         | 84.21                           | -0.3000                   |
| 69         | 81.46                           | -0.3838                   |
| 89         | 78.20                           | -0.4932                   |
| 107        | 75.59                           | -0.5903                   |
| 122        | 73.41                           | -0.6794                   |

k racemisation = 9.24699E-05 s<sup>-1</sup>  
k enantiomerisation = 4.6235E-05 s<sup>-1</sup>  
 $\Delta G^\ddagger$  enantiomerisation = **115.63** kJ.mol<sup>-1</sup>  
27.66 kcal.mol<sup>-1</sup>  
half-life time t<sub>1/2</sub> = 7496 seconds  
124.93 minutes  
2.08 hours  
0.09 days

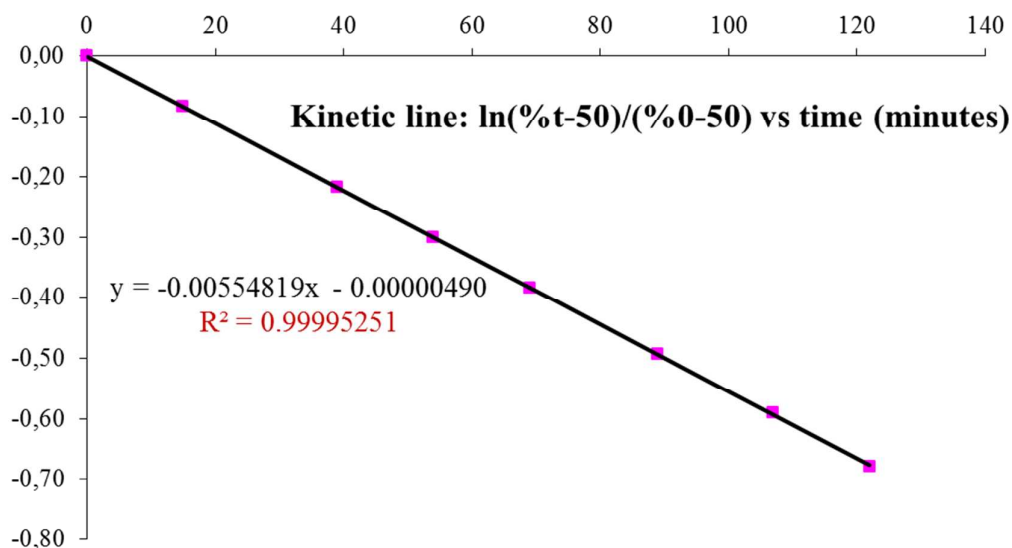

### Enantiomerisation barrier for (10g)

About 3 mg of enantio-enriched (**10g**) were refluxed in 15 mL of chlorobenzene. Samples of 10  $\mu\text{L}$  of this solution were injected on (S,S)-Whelk-O1 (heptane / isopropanol 95/5, 1 mL/min, UV detection at 220 nm) to monitor the percentage decrease of the second eluted enantiomer over time.

Solvent : chlorobenzene  
Temperature = 132 °C

| Time (min) | % second eluted enantiomer (%t) | $\ln ((\%t-50)/(\%0-50))$ |
|------------|---------------------------------|---------------------------|
| 0          | 96.8                            | 0                         |
| 59         | 95.28                           | -0.033017769              |
| 1181       | 75.79                           | -0.595896383              |

k racemisation = 8.38783E-06  $\text{s}^{-1}$   
k enantiomerisation = 4.1939E-06  $\text{s}^{-1}$   
 $\Delta G^\ddagger$  enantiomerisation = **141.97**  $\text{kJ.mol}^{-1}$   
33.96  $\text{kcal.mol}^{-1}$   
half-life time  $t_{1/2}$  = 82637 seconds  
1377.29 minutes  
22.95 hours  
0.956449469 days

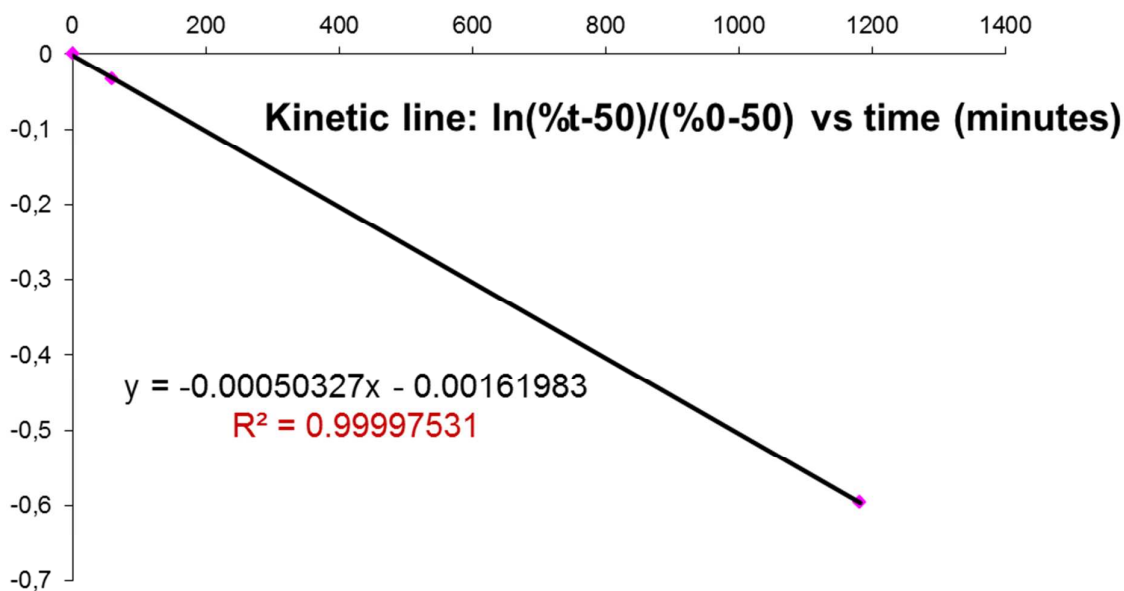

### Enantiomerisation barrier for (10h)

About 3 mg of enantio-enriched (**10h**) were refluxed in 15 mL of 1,2-dichlorobenzene. Samples of 10  $\mu$ L of this solution were injected on (S,S)-Whelk-O1 (heptane / ethanol 50/50, 1 mL/min, UV detection at 230 nm) to monitor the percentage decrease of the second eluted enantiomer over time.

Solvent : 1,2-dichlorobenzene  
Temperature = 182 °C

| Time (min) | % second eluted enantiomer (%t) | $\ln ((\%t-50)/(\%0-50))$ |
|------------|---------------------------------|---------------------------|
| 0          | 91.39                           | 0.0000                    |
| 18         | 88.77                           | -0.0654                   |
| 36         | 86.55                           | -0.1244                   |
| 68         | 82.85                           | -0.2311                   |

k racemisation = 5.63638E-05 s<sup>-1</sup>  
k enantiomerisation = 2.8182E-05 s<sup>-1</sup>  
 $\Delta G^\ddagger$  enantiomerisation = **152.73** kJ.mol<sup>-1</sup>  
36.54 kcal.mol<sup>-1</sup>  
half-life time  $t_{1/2}$  = 12298 seconds  
204.96 minutes  
3.42 hours  
0.14 days

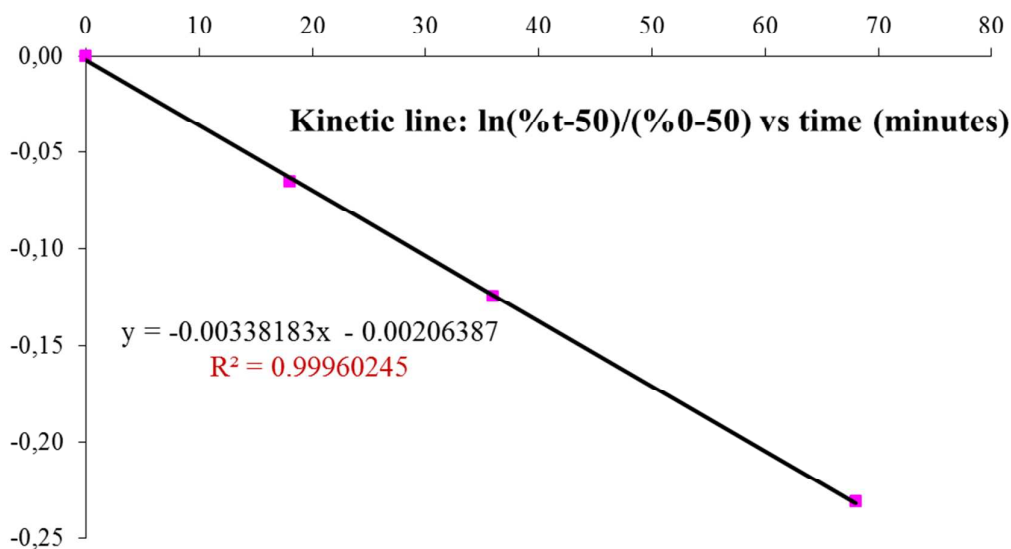

### Enantiomerisation barrier for (10i)

About 3 mg of enantio-enriched (**10i**) were refluxed in 15 mL of ethanol. Samples of 10  $\mu$ L of this solution were injected on Lux-Cellulose-2 (heptane / isopropanol 95/5, 1 mL/min, UV detection at 220 nm) to monitor the percentage decrease of the second eluted enantiomer over time.

Solvent : Ethanol  
Temperature = 78.29 °C

| Time (min) | % second eluted enantiomer (%t) | $\ln ((\%t-50)/(\%0-50))$ |
|------------|---------------------------------|---------------------------|
| 0          | 93.95                           | 0                         |
| 29         | 90.61                           | -0.079038282              |
| 63         | 87.22                           | -0.166206373              |
| 89         | 84.85                           | -0.231999487              |
| 119        | 82.25                           | -0.309534581              |

k racemisation = 4.31829E-05 s<sup>-1</sup>  
k enantiomerisation = 2.1591E-05 s<sup>-1</sup>  
 $\Delta G^\ddagger$  enantiomerisation = **117.94** kJ.mol<sup>-1</sup>  
28.22 kcal.mol<sup>-1</sup>  
half-life time t<sub>1/2</sub> = 16051 seconds  
267.52 minutes  
4.46 hours  
0.185780272 days

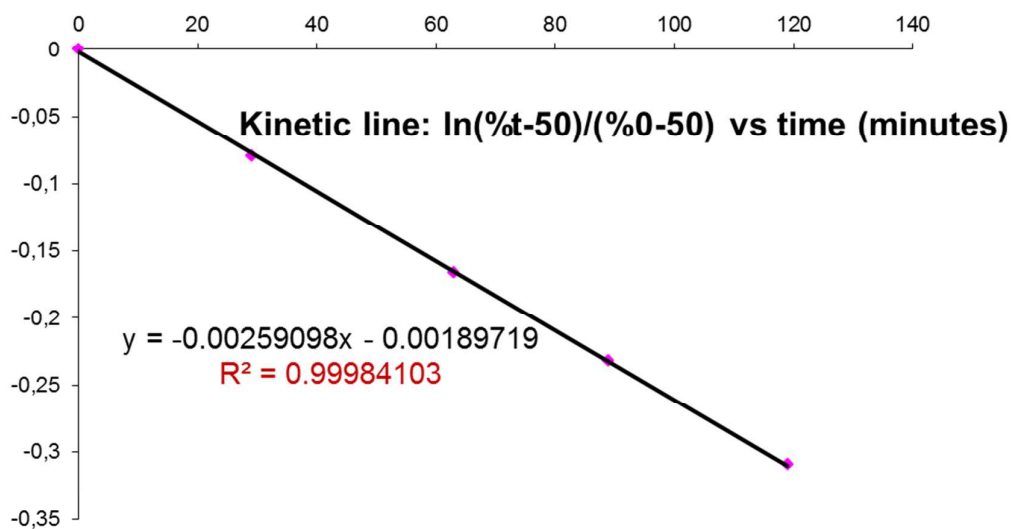

### Enantiomerisation barrier for (10j)

About 3 mg of enantio-enriched (**10j**) were refluxed in 15 mL of ethanol. Samples of 10  $\mu$ L of this solution were injected on Lux-Cellulose-4 (heptane / ethanol 80/20, 1 mL/min, UV detection at 220 nm) to monitor the percentage decrease of the second eluted enantiomer over time.

Solvent : ethanol  
Temperature = 78.29 °C

| Time (min) | % second eluted enantiomer (%t) | $\ln ((\%t-50)/(\%0-50))$ |
|------------|---------------------------------|---------------------------|
| 0          | 97.77                           | 0.0000                    |
| 14         | 97.56                           | -0.0044                   |
| 60         | 96.77                           | -0.0212                   |
| 120        | 95.80                           | -0.0421                   |
| 249        | 93.76                           | -0.0877                   |
| 393        | 91.56                           | -0.1393                   |
| 1397       | 78.83                           | -0.5050                   |
| 1697       | 76.14                           | -0.6029                   |

k racemisation = 5.96718E-06 s<sup>-1</sup>  
k enantiomerisation = 2.9836E-06 s<sup>-1</sup>  
 $\Delta G^\ddagger$  enantiomerisation = **123.73** kJ.mol<sup>-1</sup>  
29.60 kcal.mol<sup>-1</sup>  
half-life time t<sub>1/2</sub> = 116160 seconds  
1936.00 minutes  
32.27 hours  
1.34 days

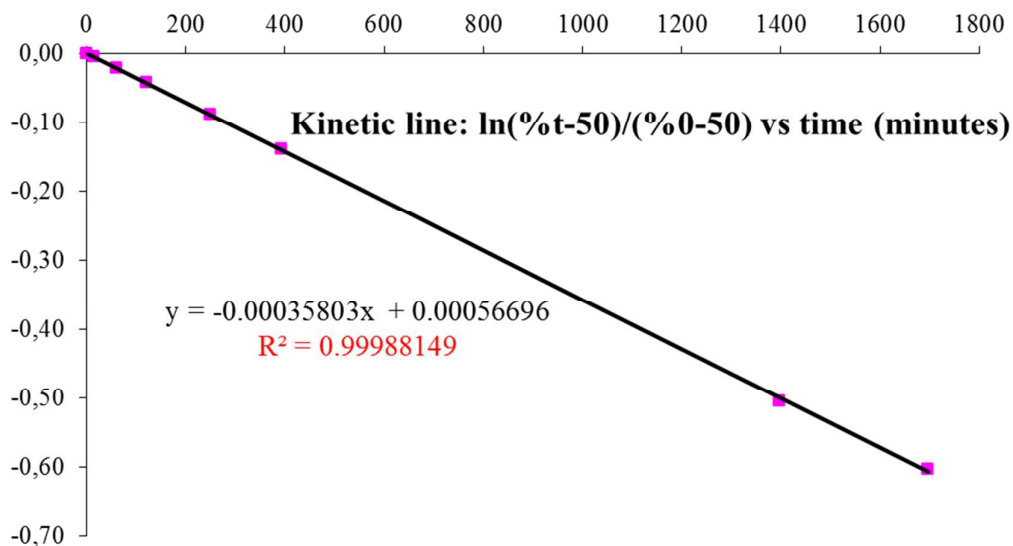

### Enantiomerisation barrier for (10k)

About 3 mg of enantio-enriched (**10k**) were refluxed in 15 mL of ethanol. Samples of 10  $\mu$ L of this solution were injected on Lux-Cellulose-4 (heptane / ethanol 80/20, 1 mL/min, UV detection at 220 nm) to monitor the percentage decrease of the second eluted enantiomer over time.

Solvent : Ethanol  
Temperature = 78.29 °C

| Time (min) | % second eluted enantiomer (%t) | $\ln ((\%t-50)/(\%0-50))$ |
|------------|---------------------------------|---------------------------|
| 0          | 96.15                           | 0.0000                    |
| 52         | 94.96                           | -0.0261                   |
| 190        | 92.43                           | -0.0840                   |
| 348        | 89.54                           | -0.1546                   |
| 1387       | 74.44                           | -0.6357                   |

k racemisation = 7.63939E-06 s<sup>-1</sup>  
k enantiomerisation = 3.8197E-06 s<sup>-1</sup>  
 $\Delta G^\ddagger$  enantiomerisation = **123.01** kJ.mol<sup>-1</sup>  
29.43 kcal.mol<sup>-1</sup>  
half-life time t<sub>1/2</sub> = 90733 seconds  
1512.22 minutes  
25.20 hours  
1.05 days

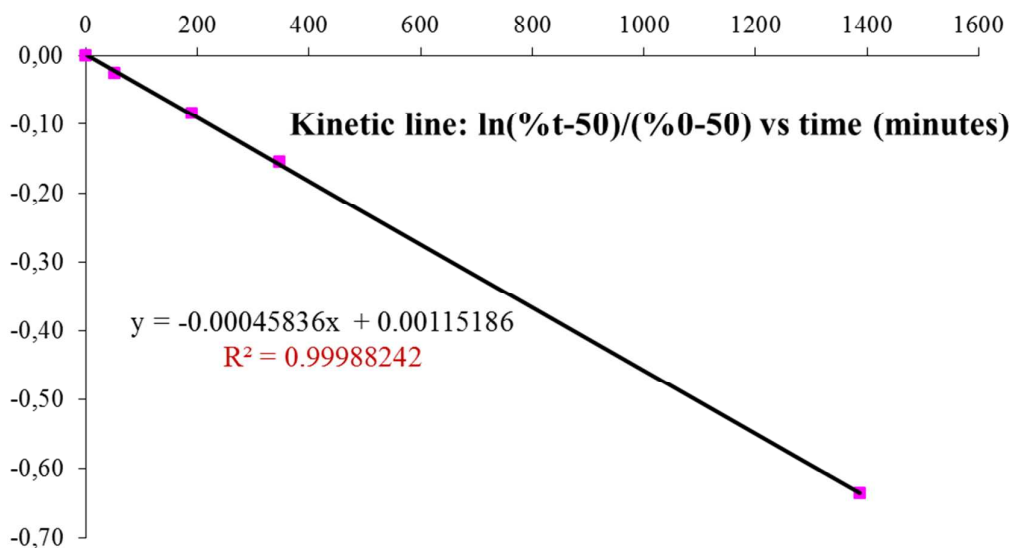

### Enantiomerisation barrier for (10I)

About 3 mg of enantio-enriched (**10I**) were refluxed in 15 mL of ethanol. Samples of 10  $\mu\text{L}$  of this solution were injected on Lux-Cellulose-3 (heptane / ethanol 80/20, 1 mL/min, UV detection at 220 nm) to monitor the percentage decrease of the second eluted enantiomer over time.

Solvent : Ethanol  
Temperature = 78.29 °C

| Time (min) | % second eluted enantiomer (%t) | $\ln ((\%t-50)/(\%0-50))$ |
|------------|---------------------------------|---------------------------|
| 0          | 97.72                           | 0.0000                    |
| 15         | 97.48                           | -0.0050                   |
| 48         | 97.05                           | -0.0141                   |
| 168        | 95.50                           | -0.0476                   |
| 1180       | 83.80                           | -0.3449                   |

k racemisation = 4.87077E-06 s<sup>-1</sup>  
k enantiomerisation = 2.4354E-06 s<sup>-1</sup>  
 $\Delta G^\ddagger$  enantiomerisation = **124.33** kJ.mol<sup>-1</sup>  
29.74 kcal.mol<sup>-1</sup>  
half-life time  $t_{1/2}$  = 142308 seconds  
2371.79 minutes  
39.53 hours  
1.65 days

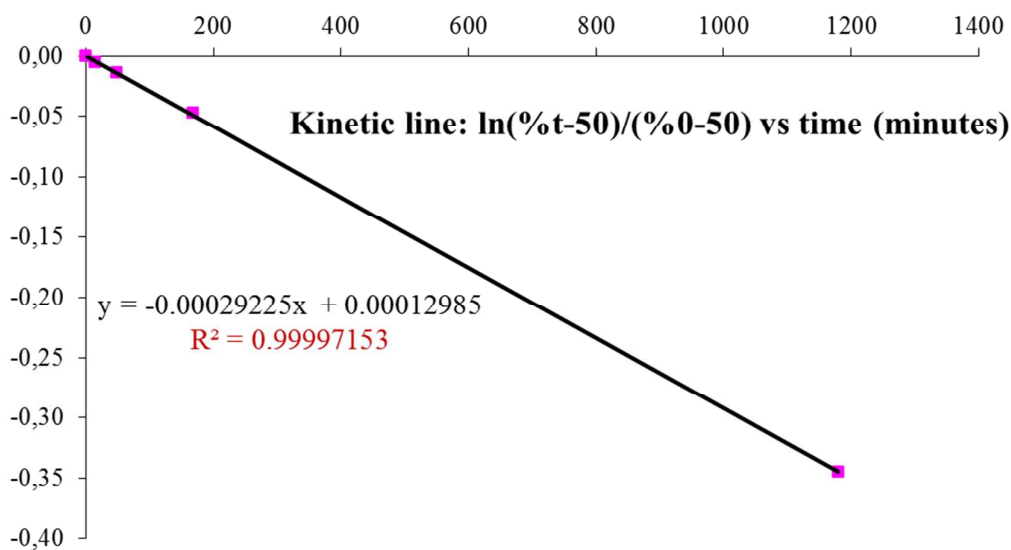

### Enantiomerisation barrier for (10m)

About 3 mg of enantio-enriched (**10m**) were refluxed in 15 mL of ethanol. Samples of 10  $\mu$ L of this solution were injected on Lux-Cellulose-4 (heptane / ethanol 80/20, 1 mL/min, UV detection at 220 nm) to monitor the percentage decrease of the second eluted enantiomer over time.

Solvent : Ethanol  
Temperature = 78.29 °C

| Time (min) | % second eluted enantiomer (%t) | $\ln ((\%t-50)/(\%0-50))$ |
|------------|---------------------------------|---------------------------|
| 0          | 97.93                           | 0.0000                    |
| 66         | 96.98                           | -0.0200                   |
| 140        | 96.26                           | -0.0355                   |
| 260        | 94.68                           | -0.0702                   |
| 1290       | 84.54                           | -0.3276                   |

k racemisation = 4.21397E-06 s<sup>-1</sup>  
k enantiomerisation = 2.1070E-06 s<sup>-1</sup>  
 $\Delta G^\ddagger$  enantiomerisation = **124.75** kJ.mol<sup>-1</sup>  
29.84 kcal.mol<sup>-1</sup>  
half-life time t<sub>1/2</sub> = 164488 seconds  
2741.47 minutes  
45.69 hours  
1.90 days

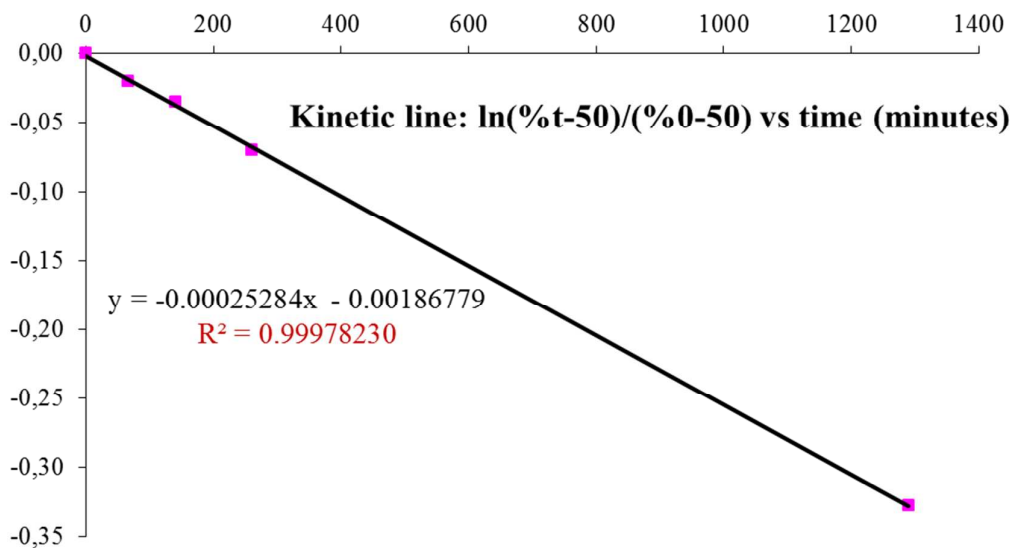

## 7. $^1\text{H}$ and $^{13}\text{C}$ NMR spectra

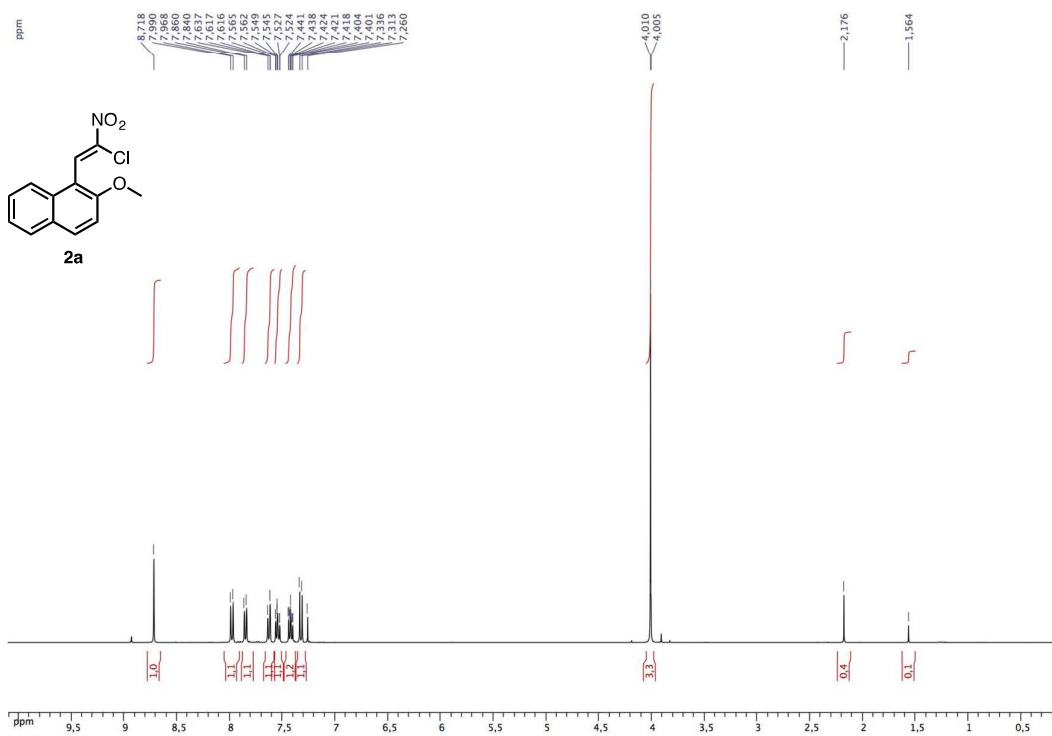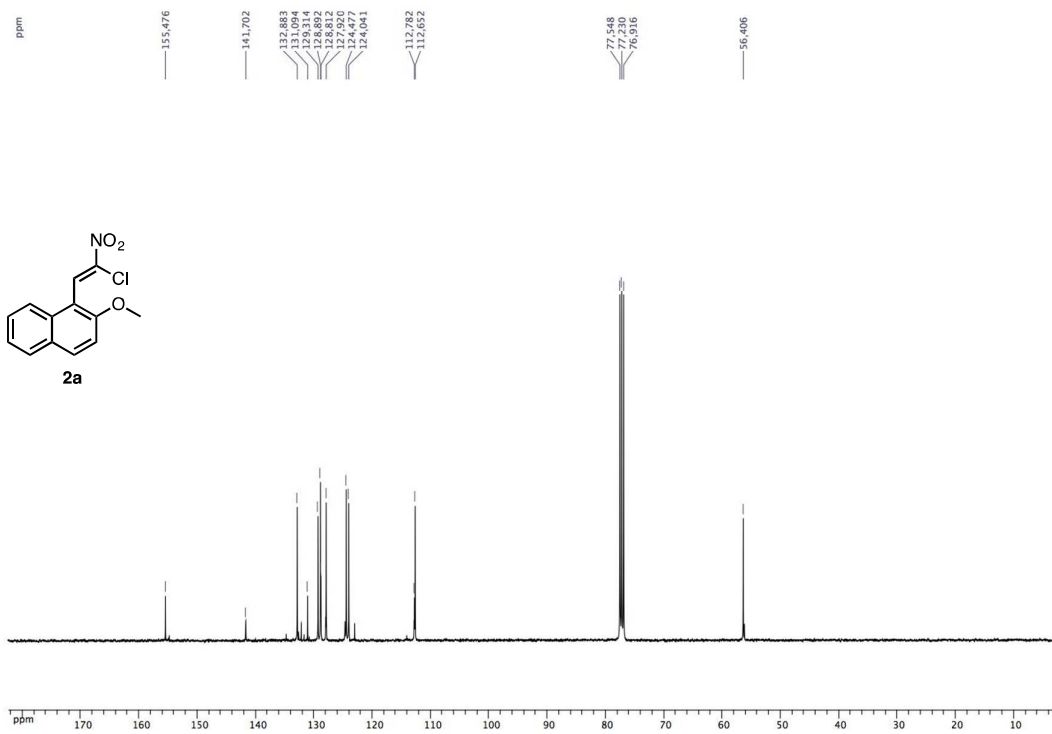

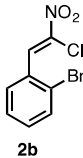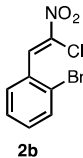

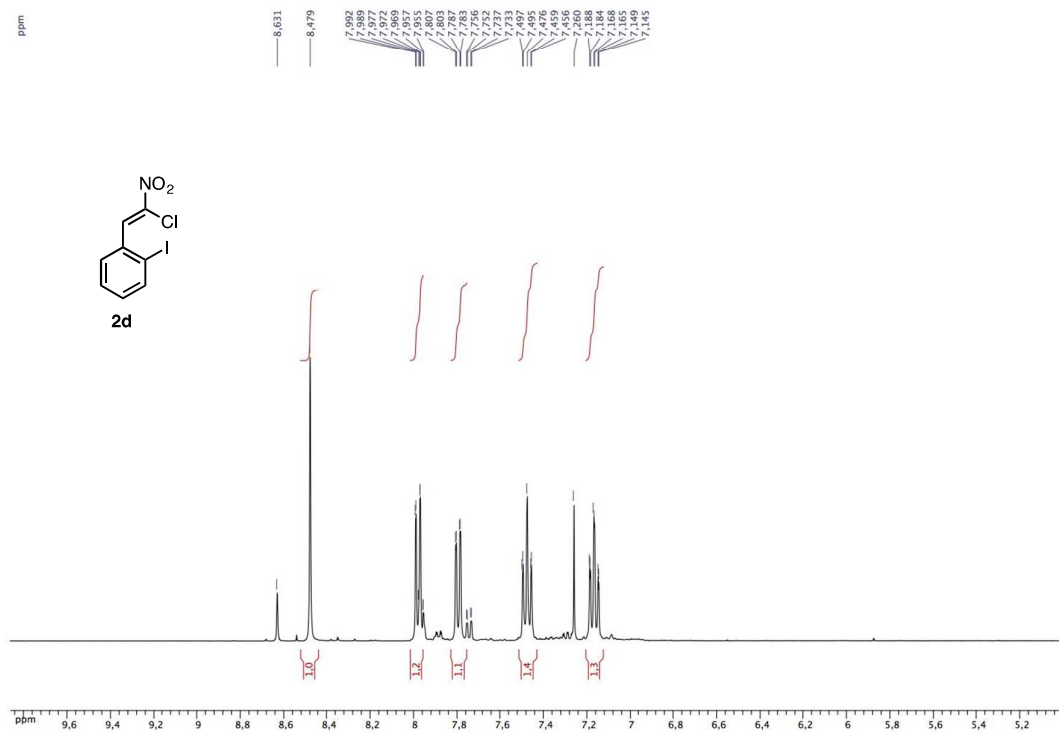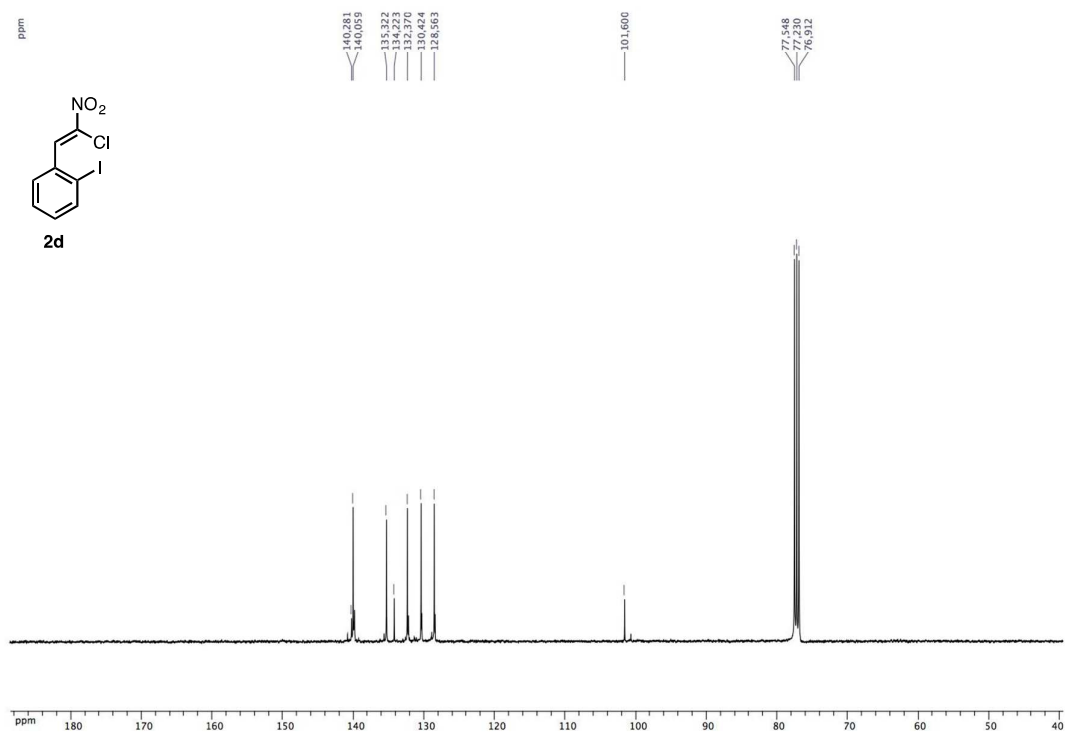

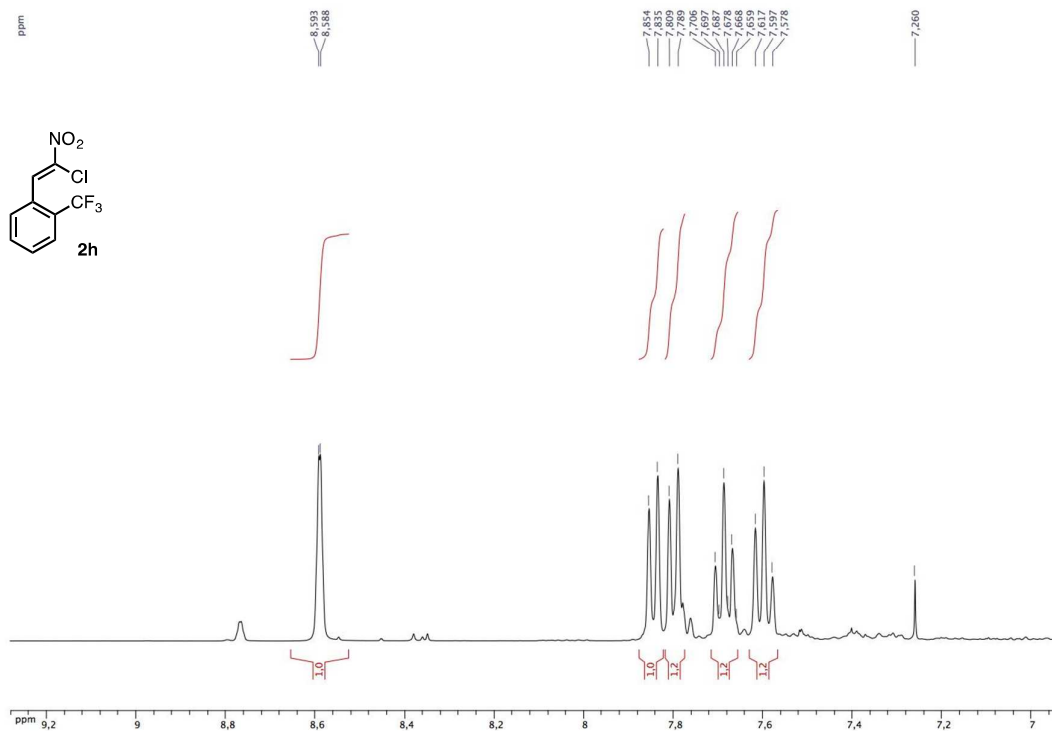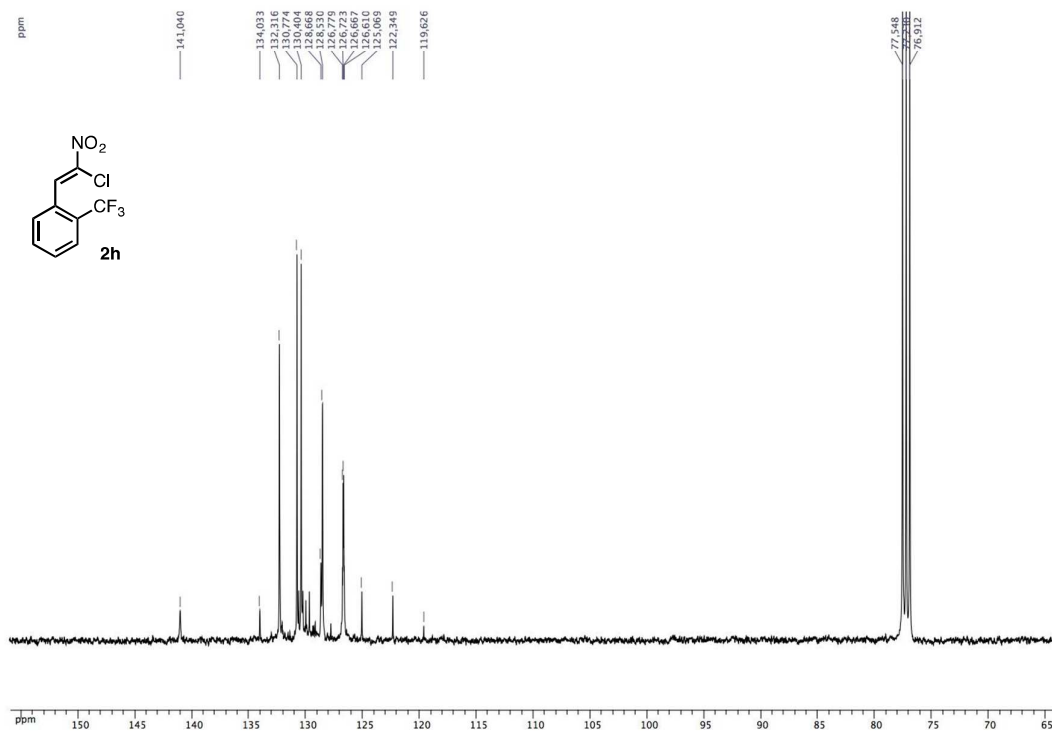

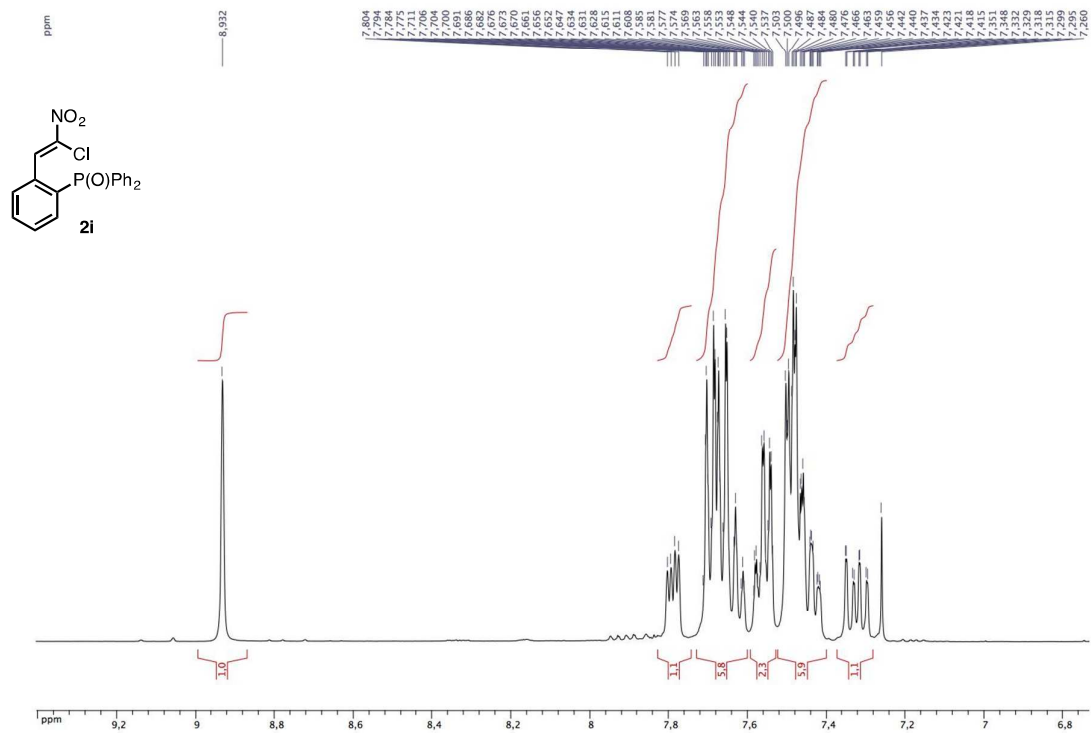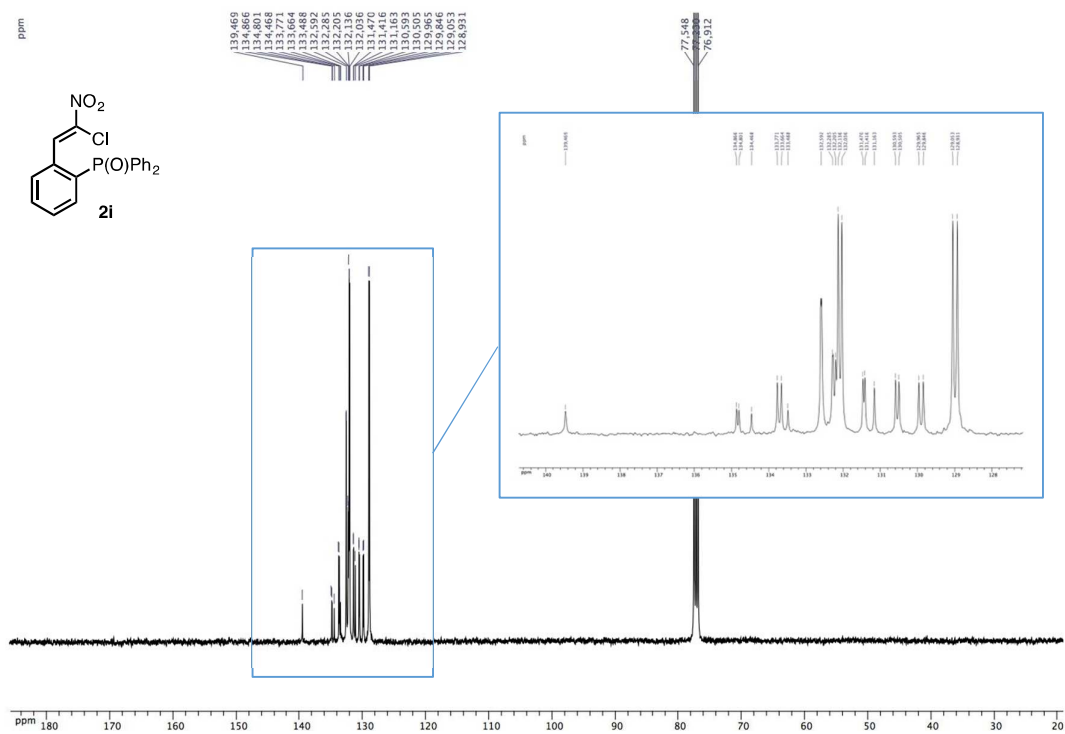

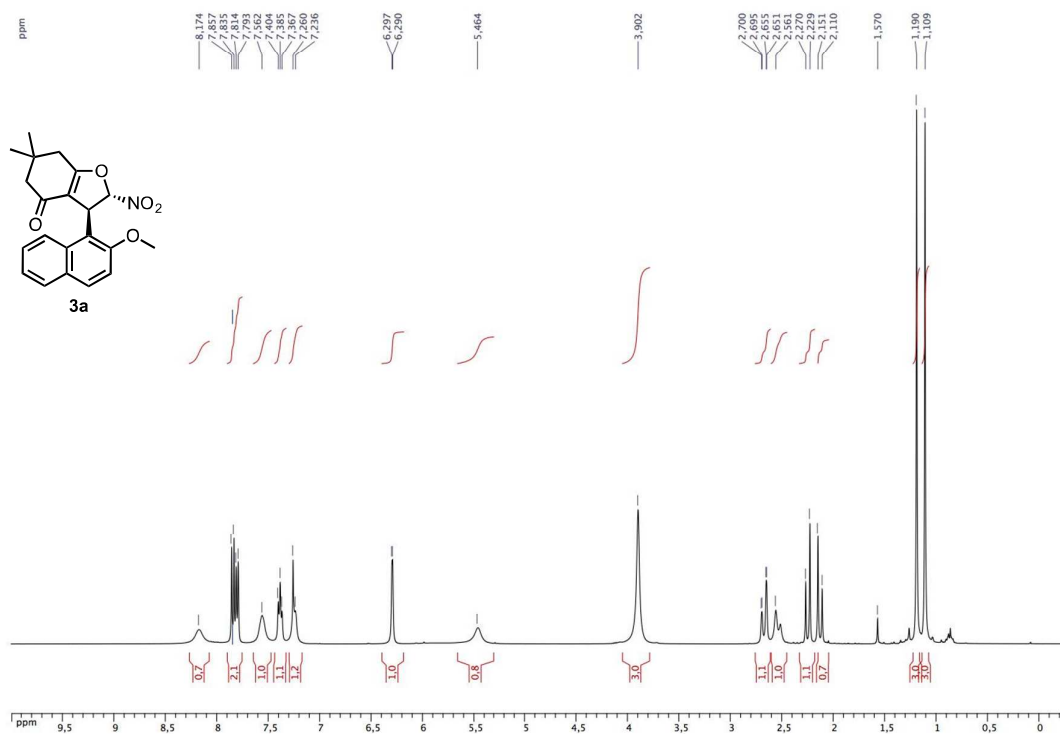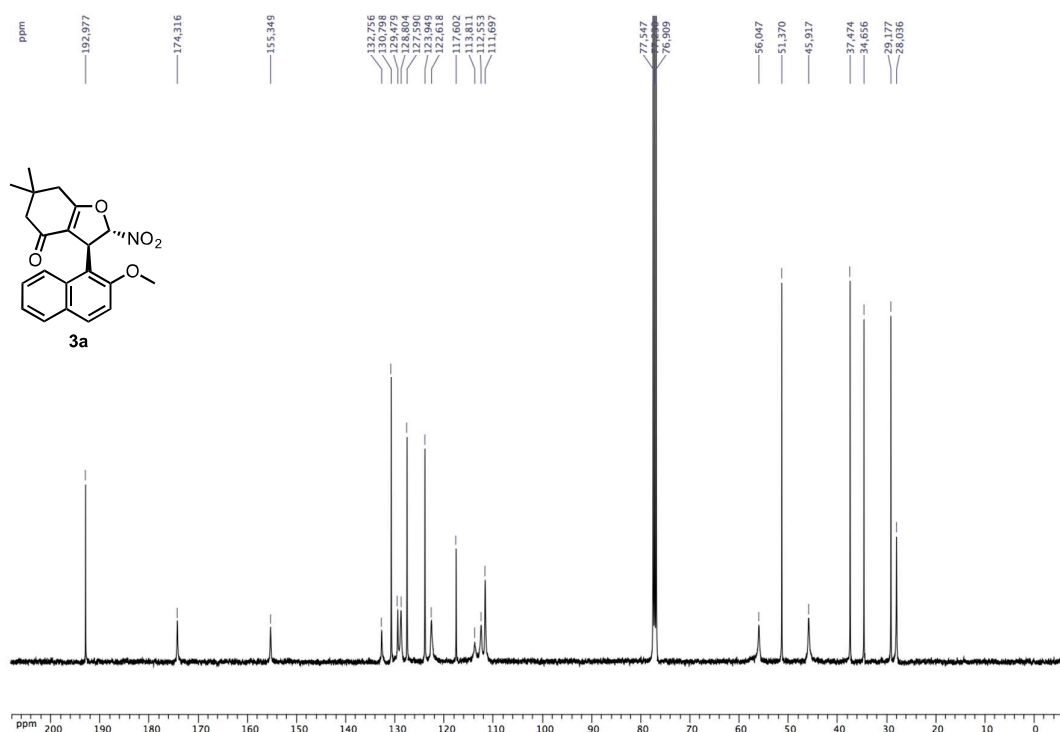

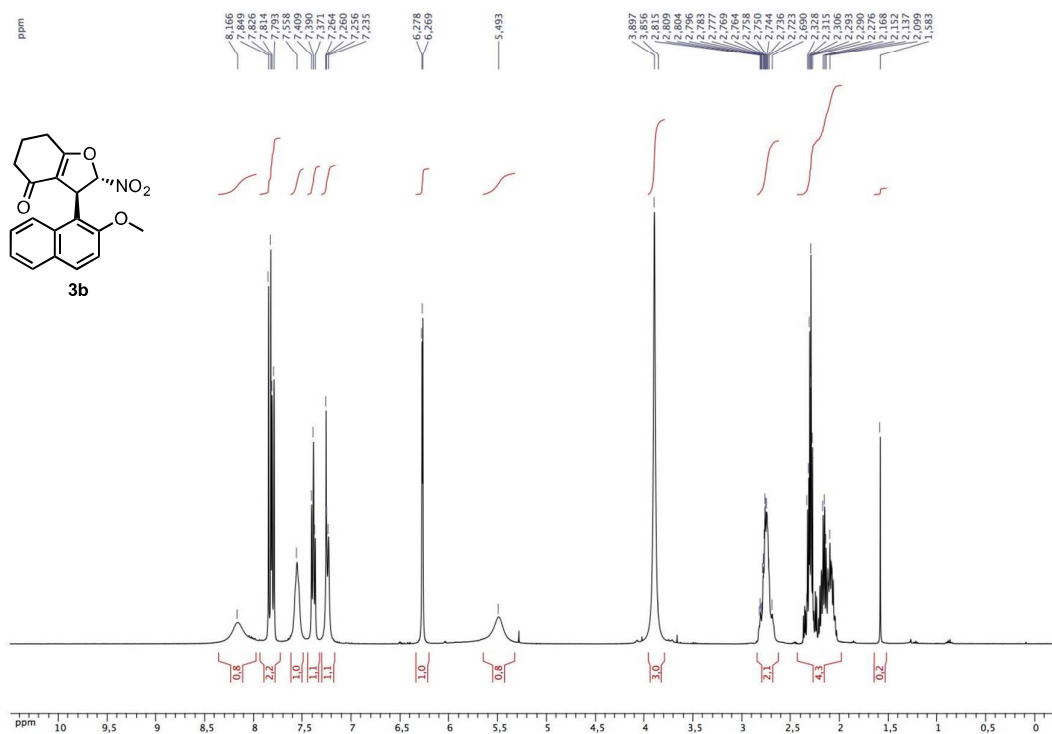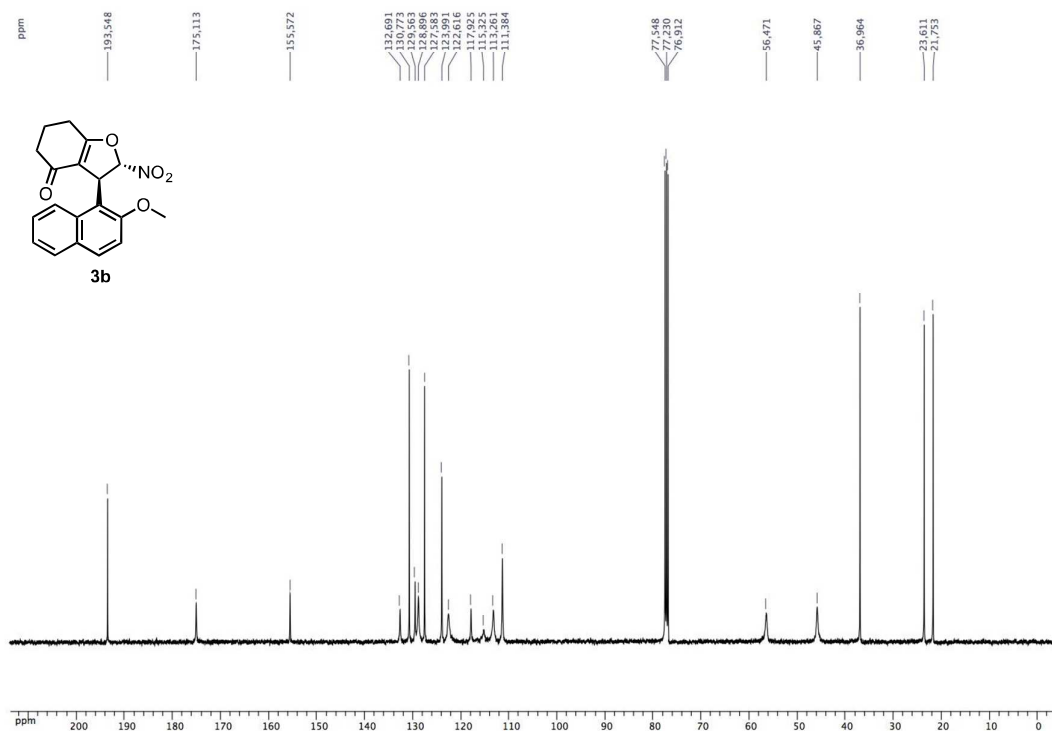

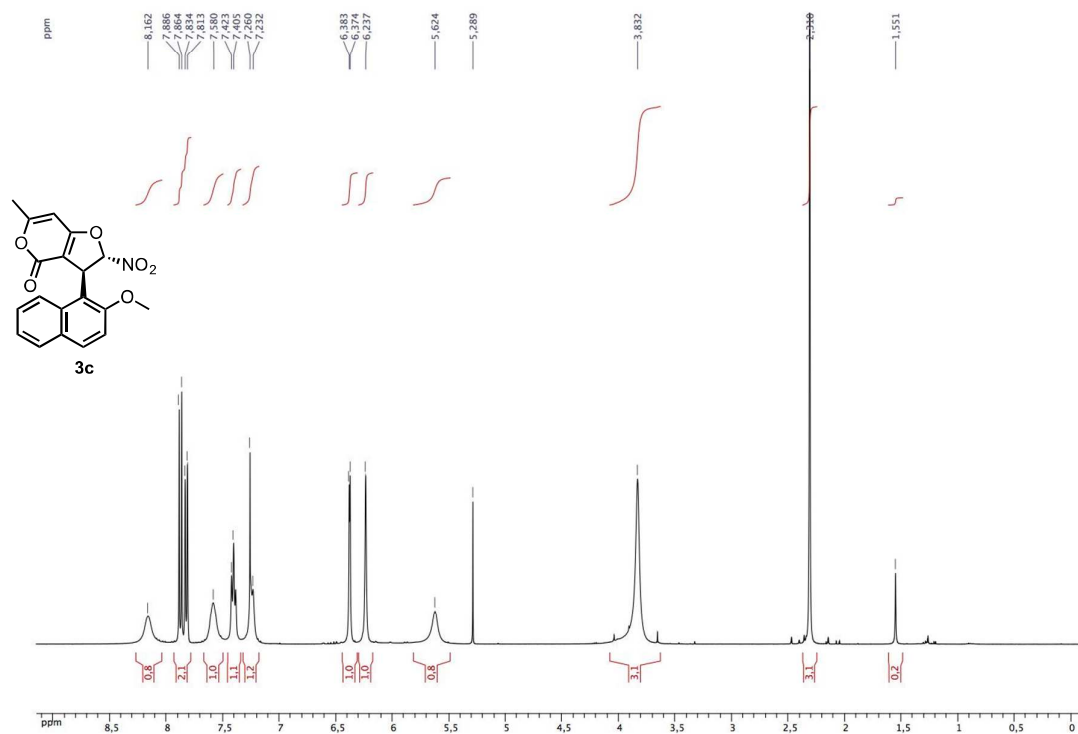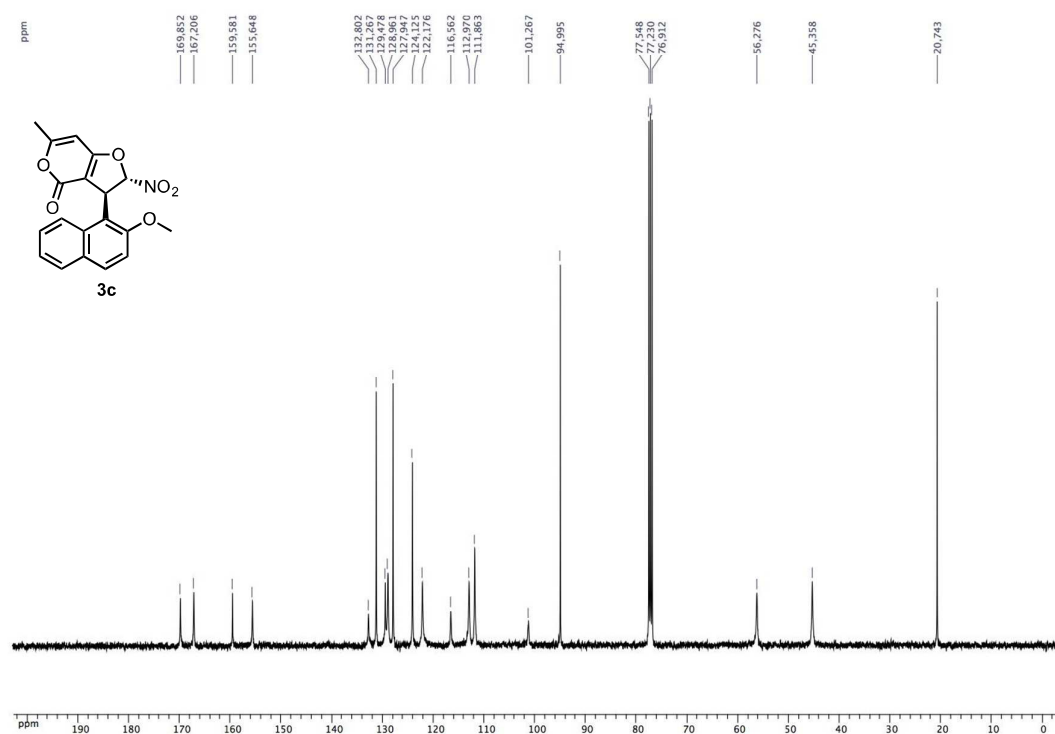

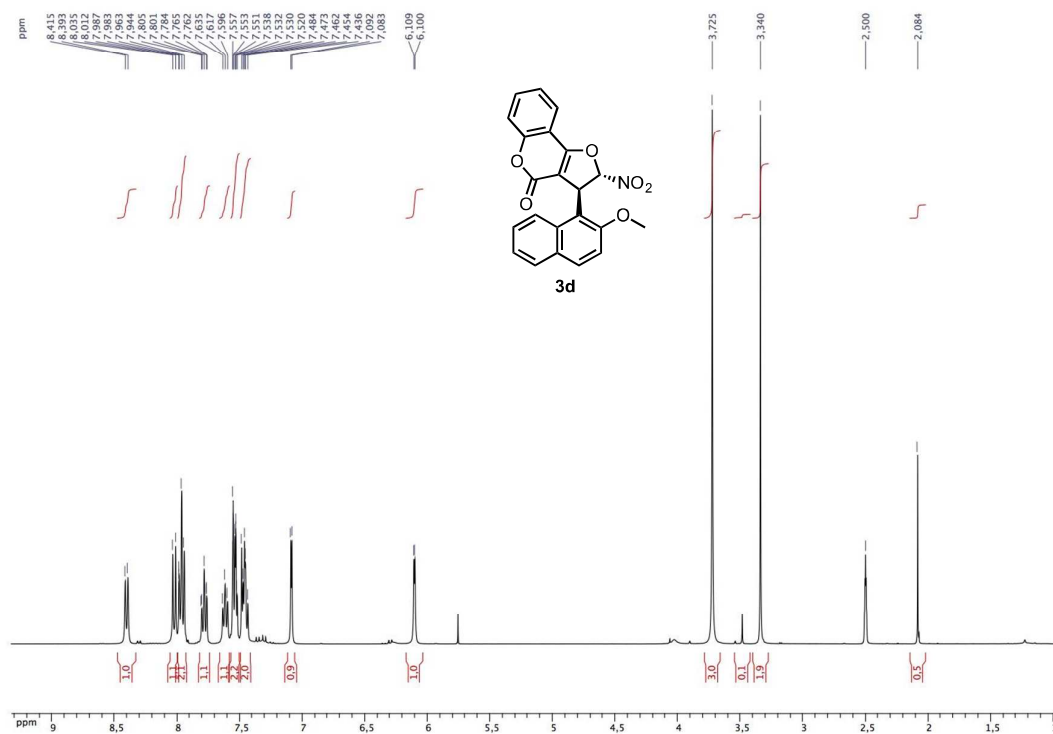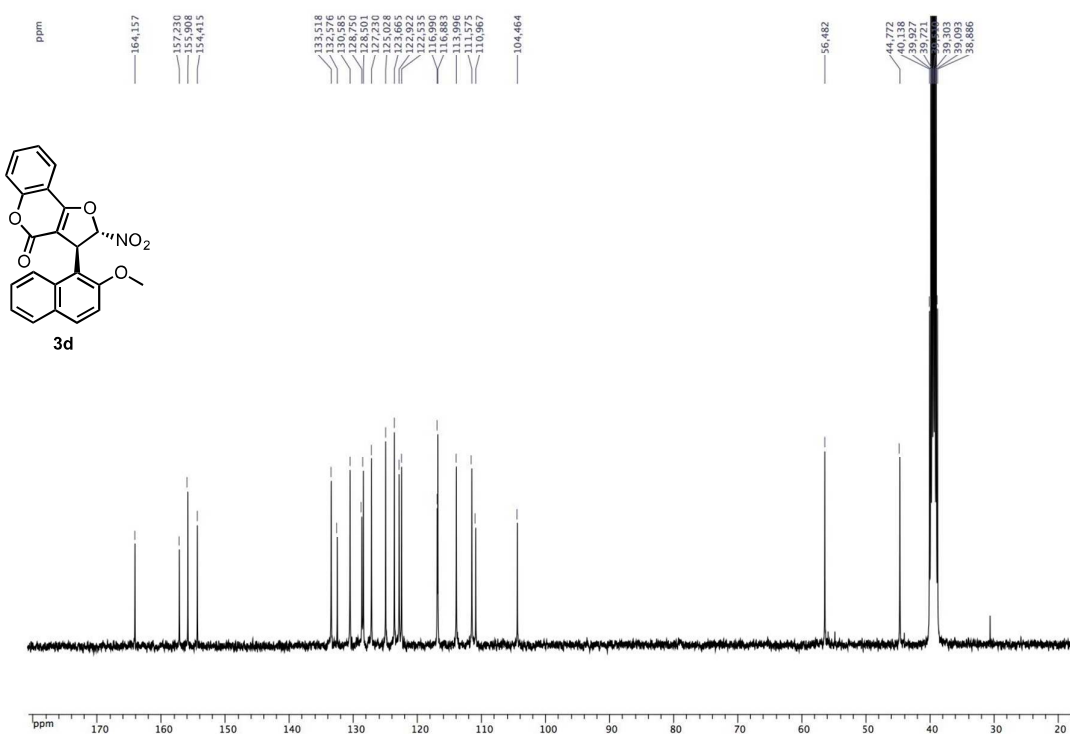

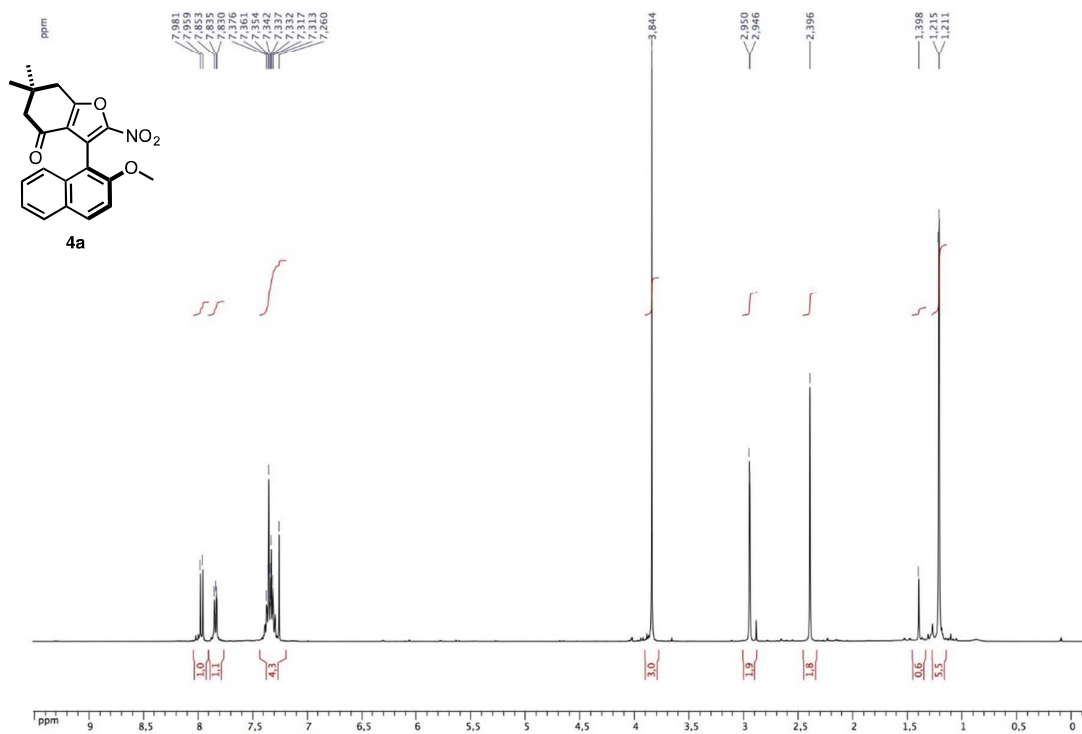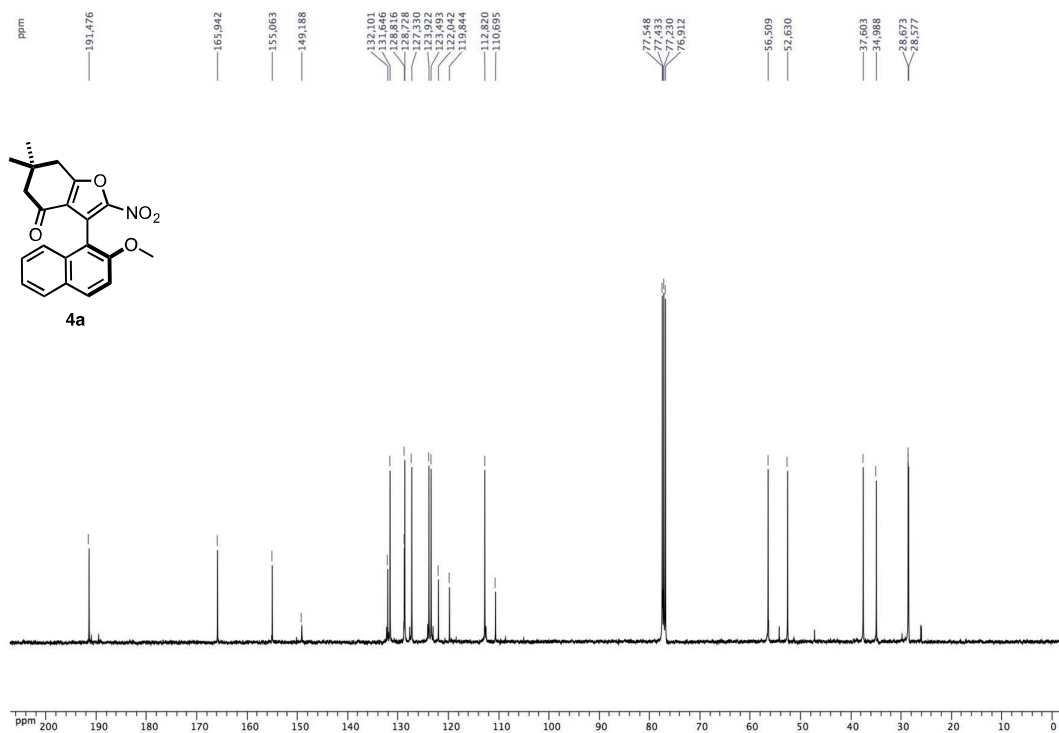

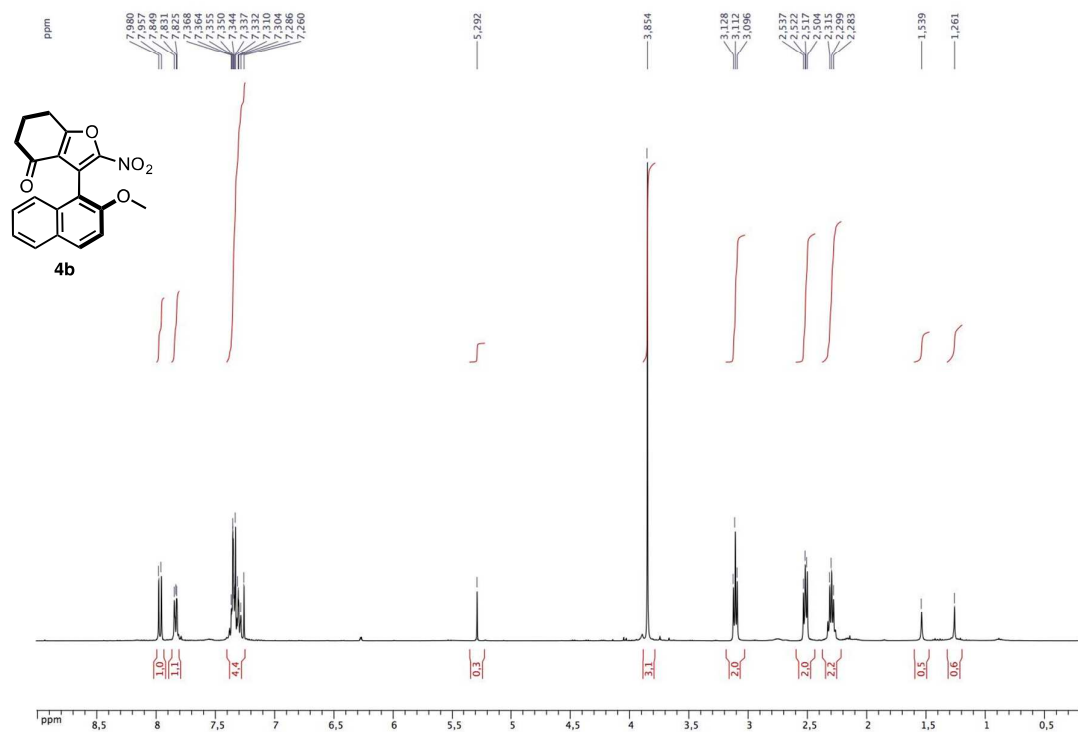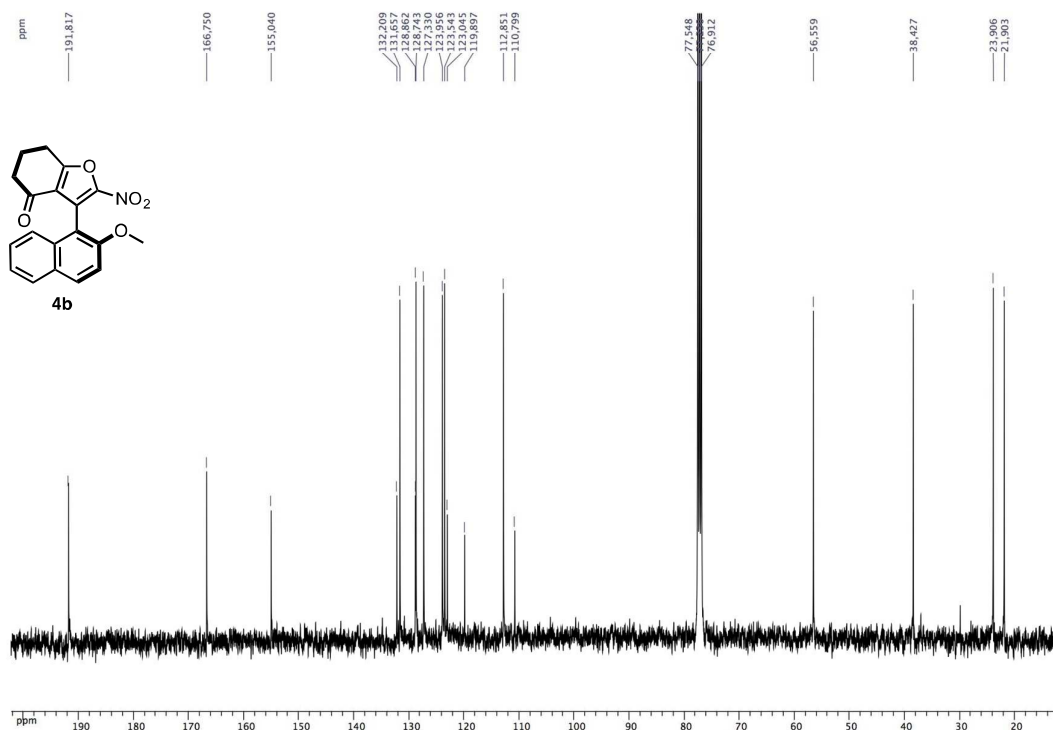

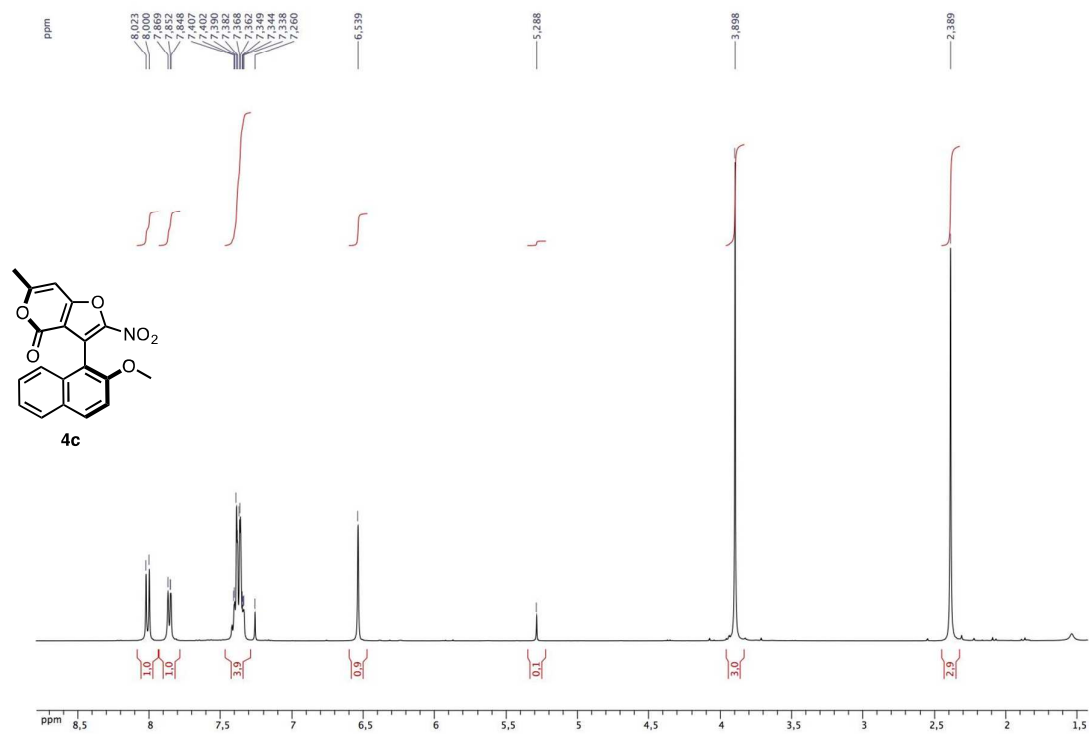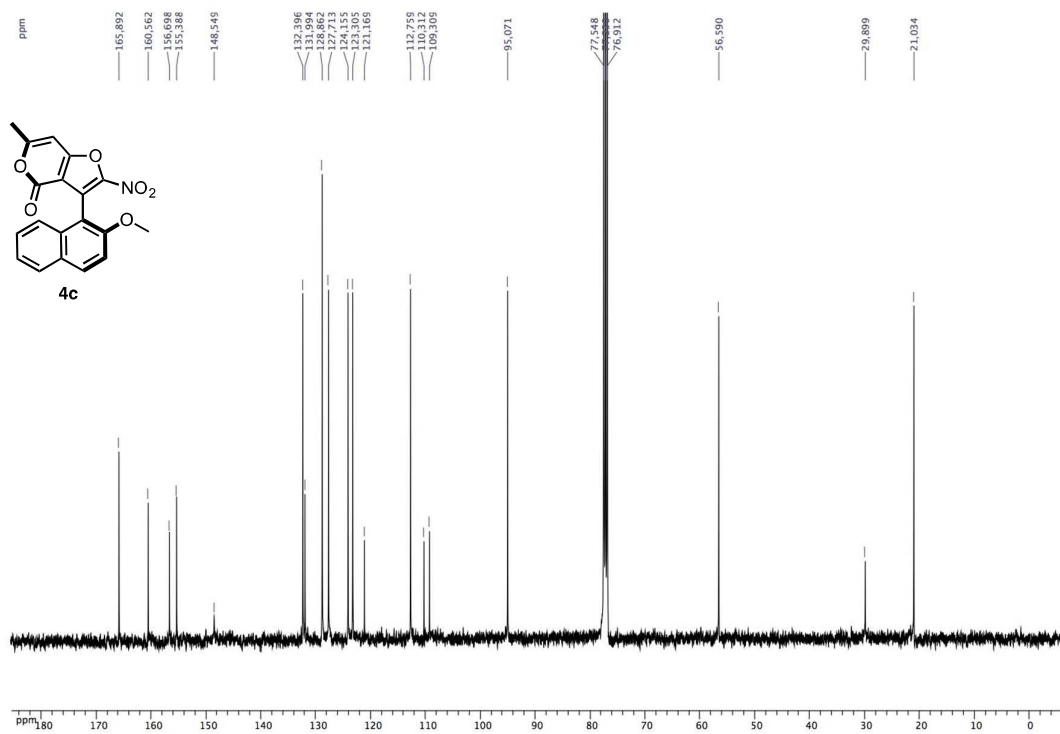

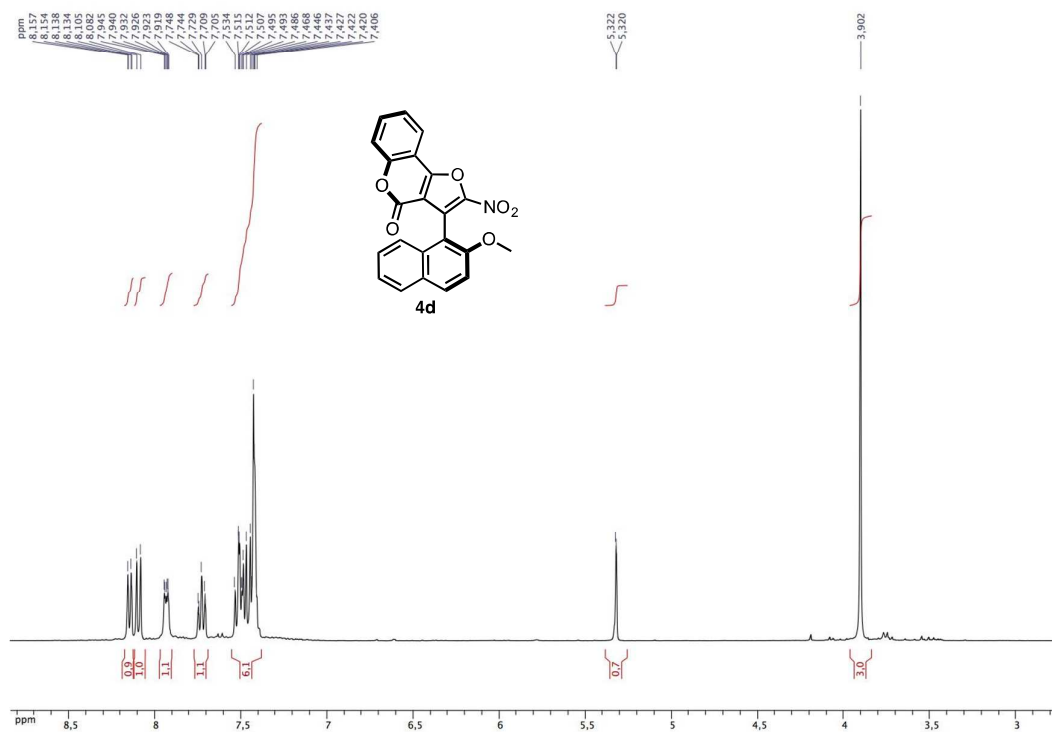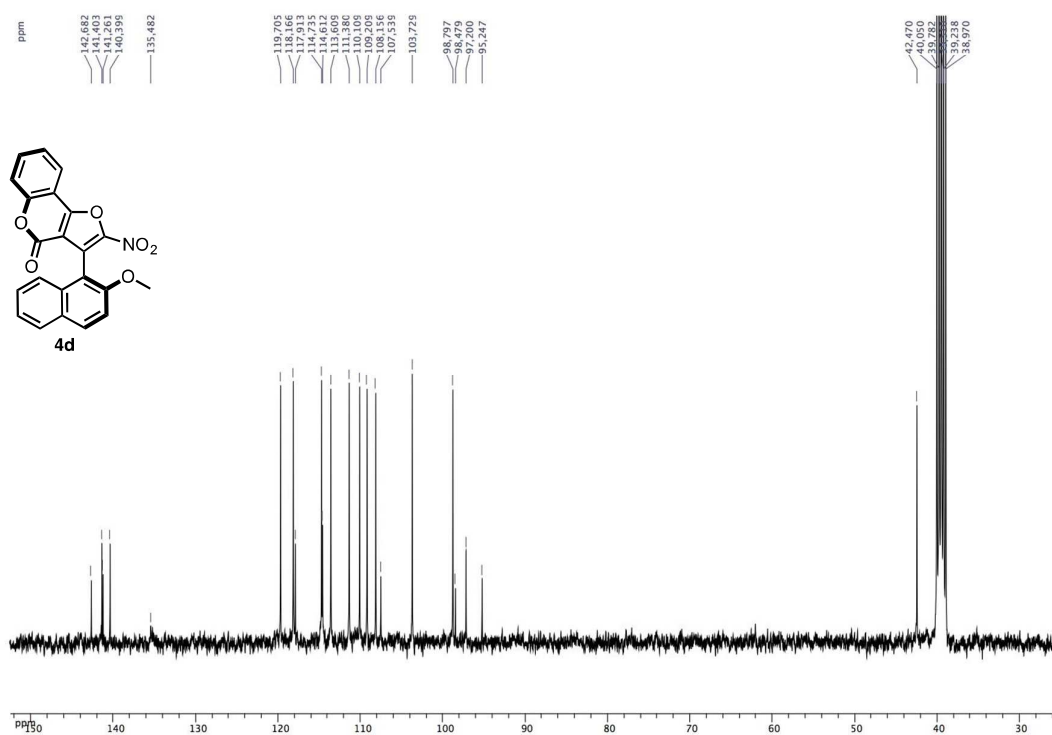

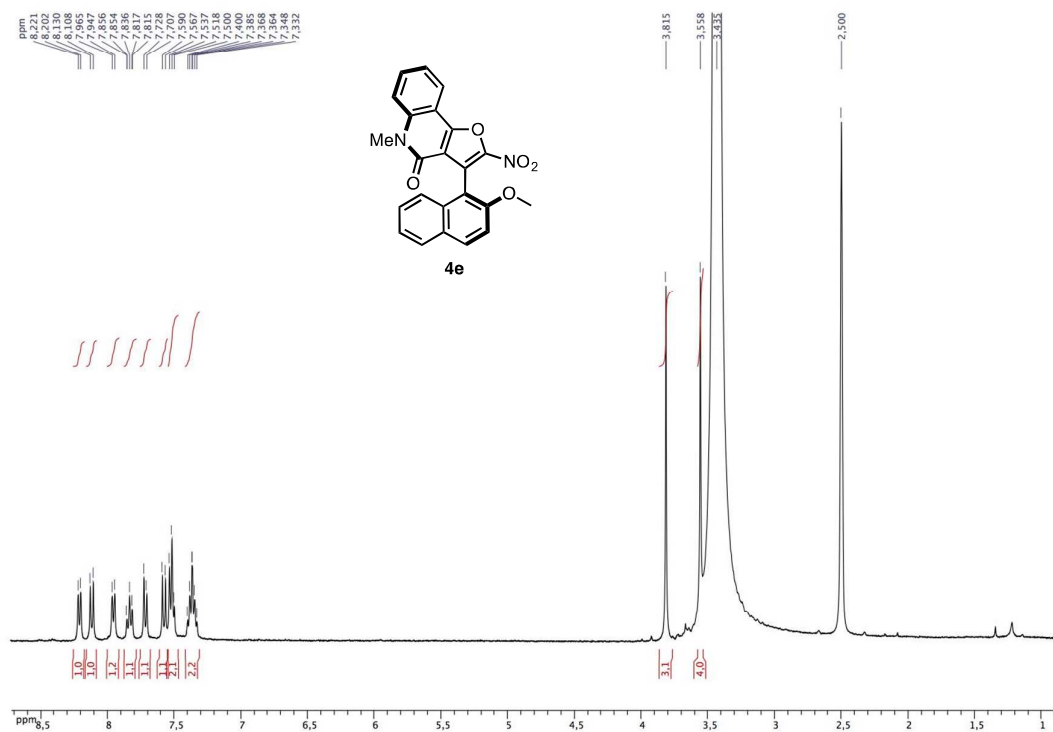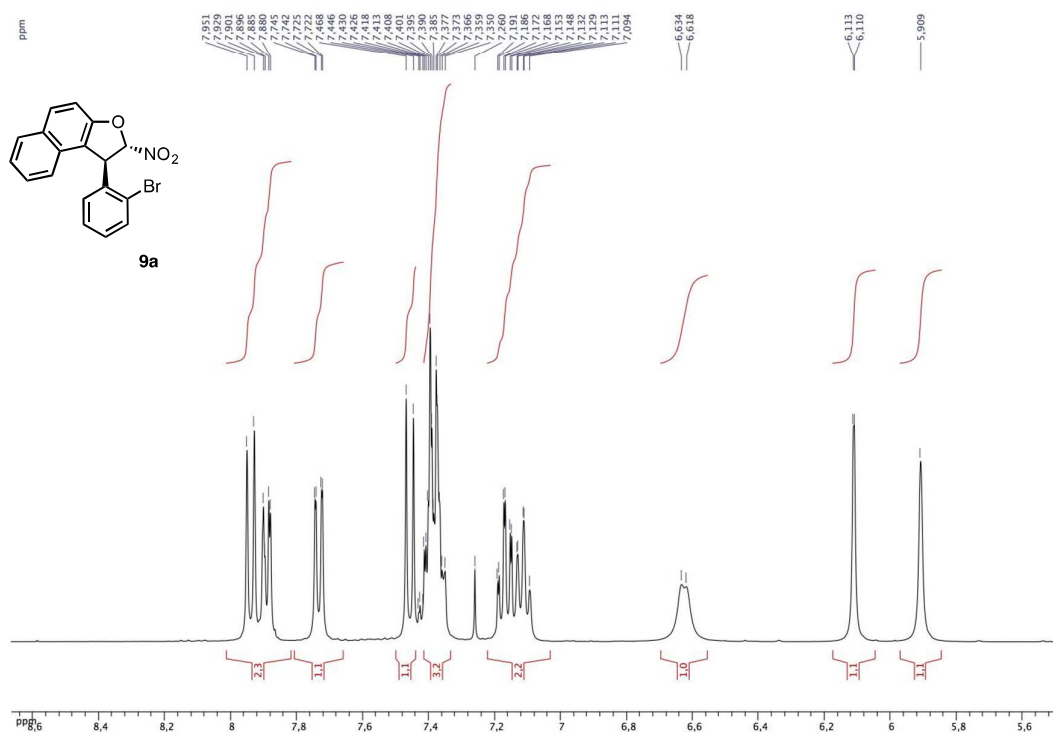

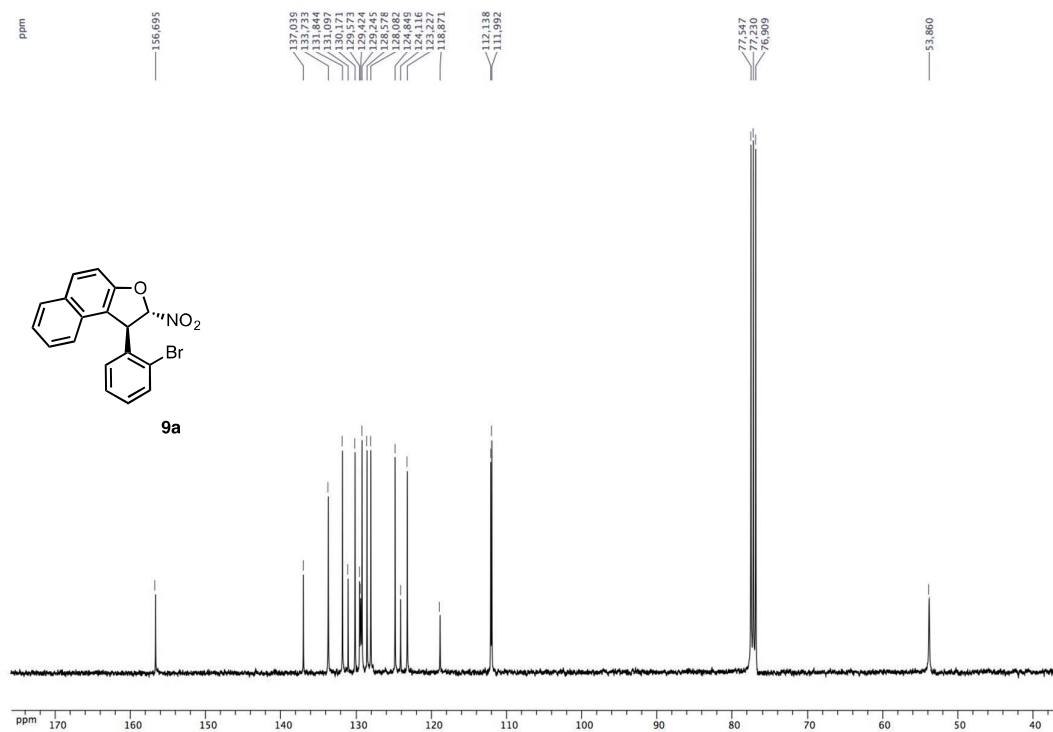

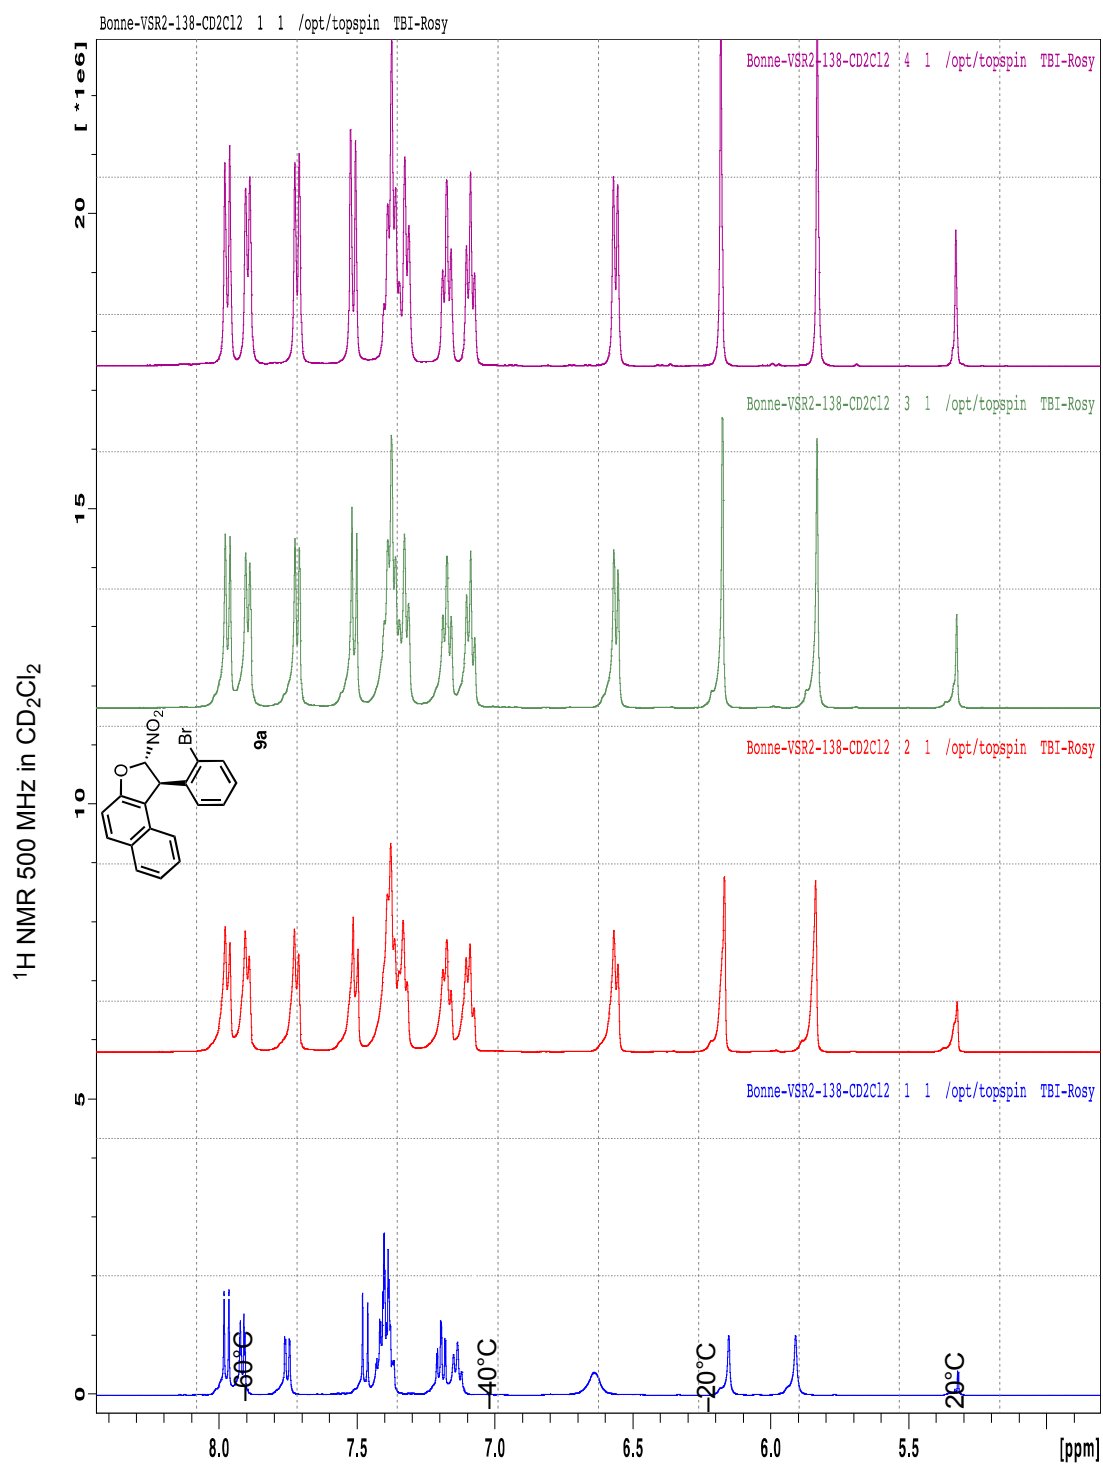

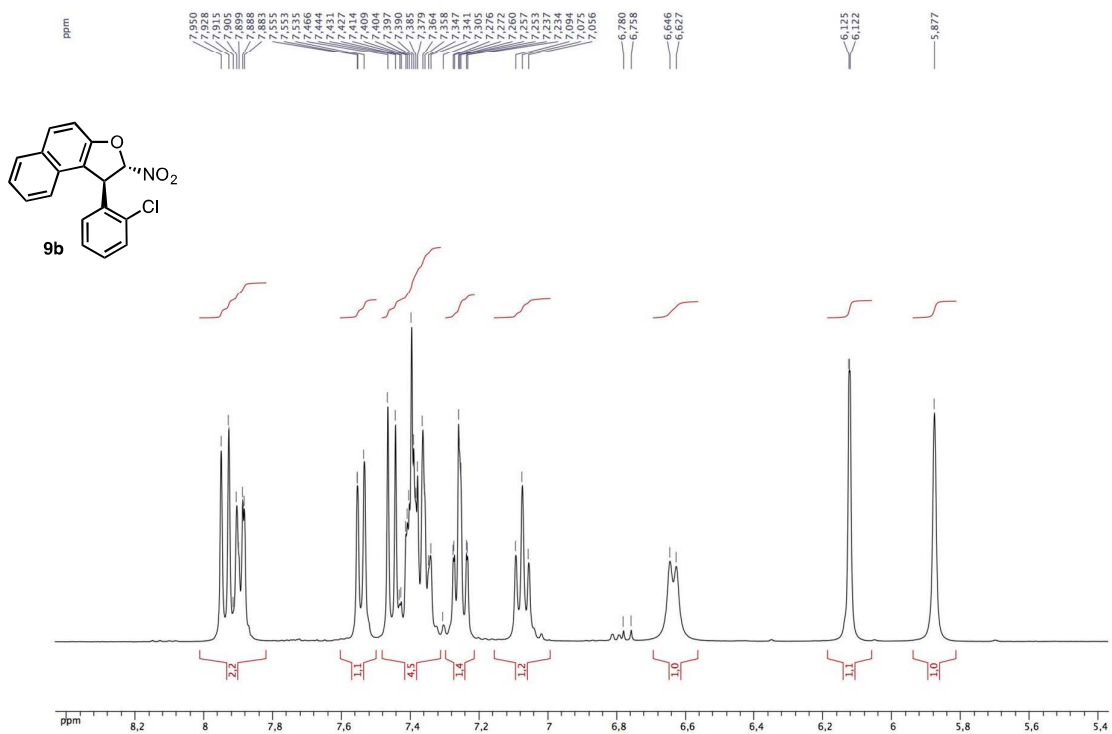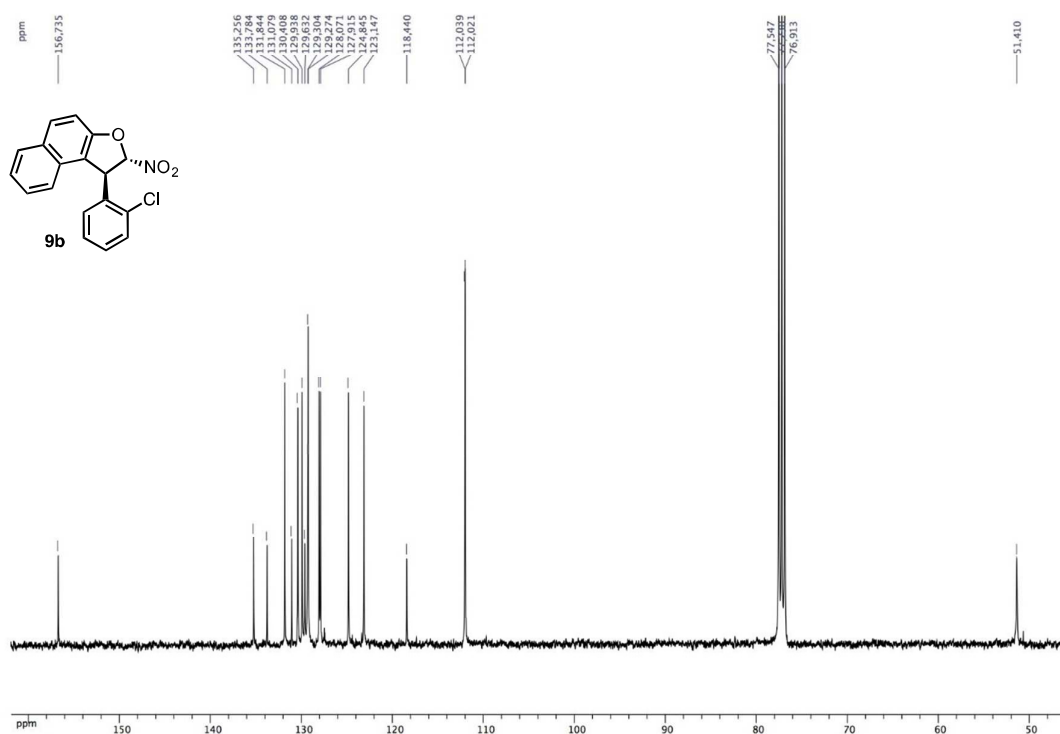

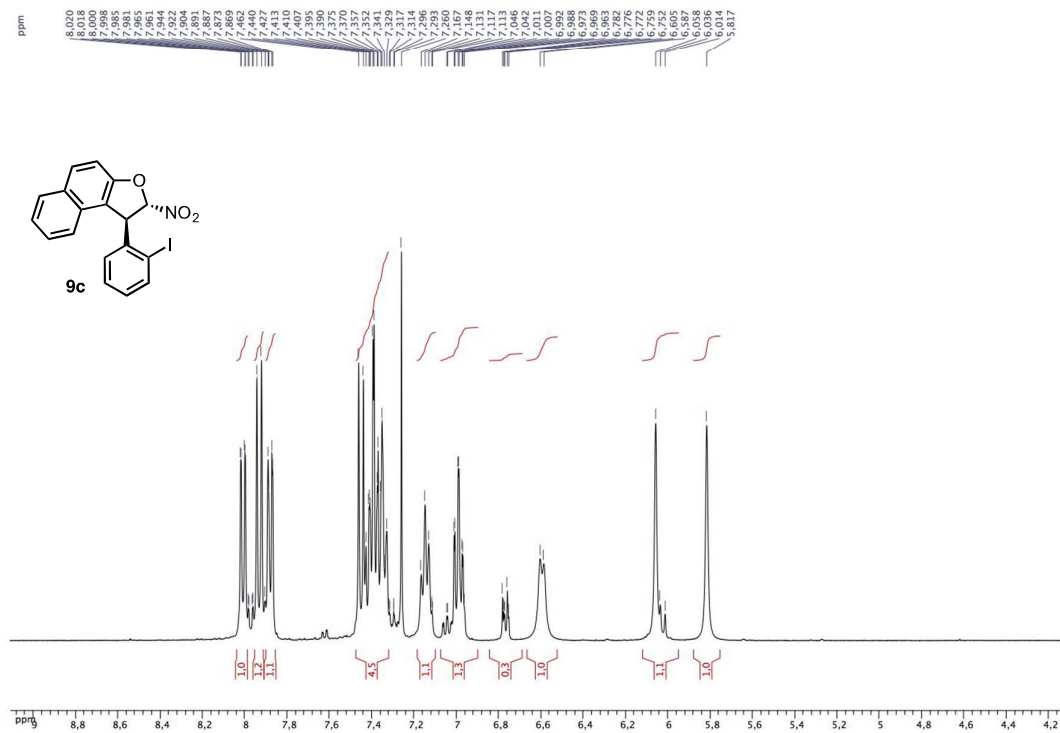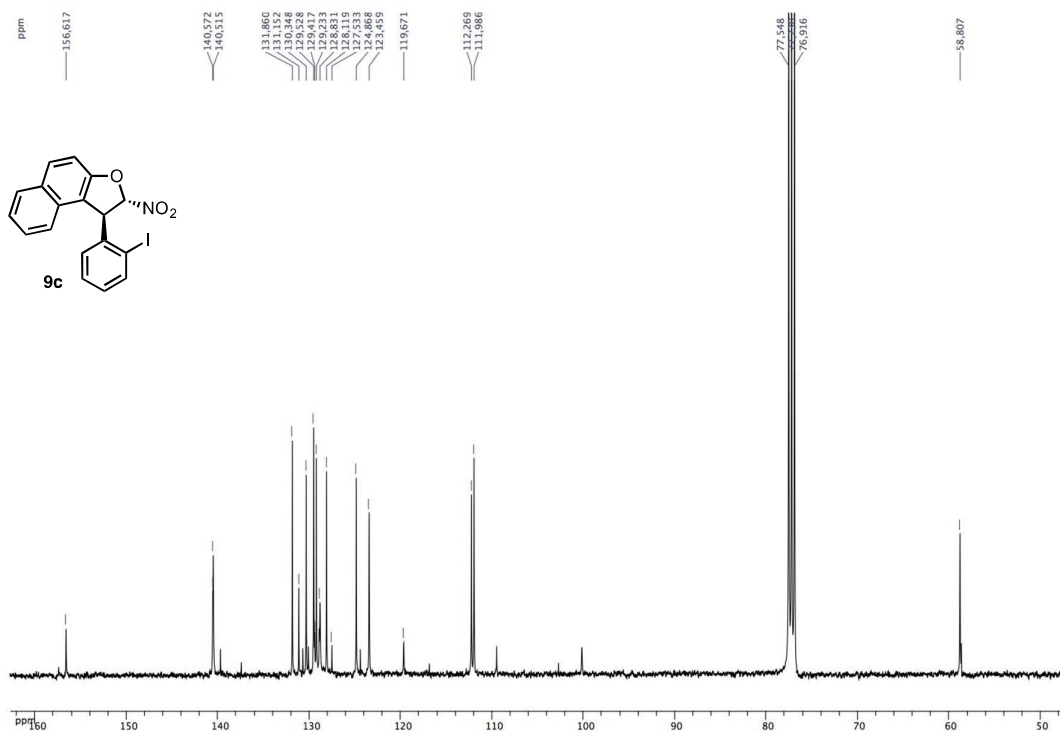

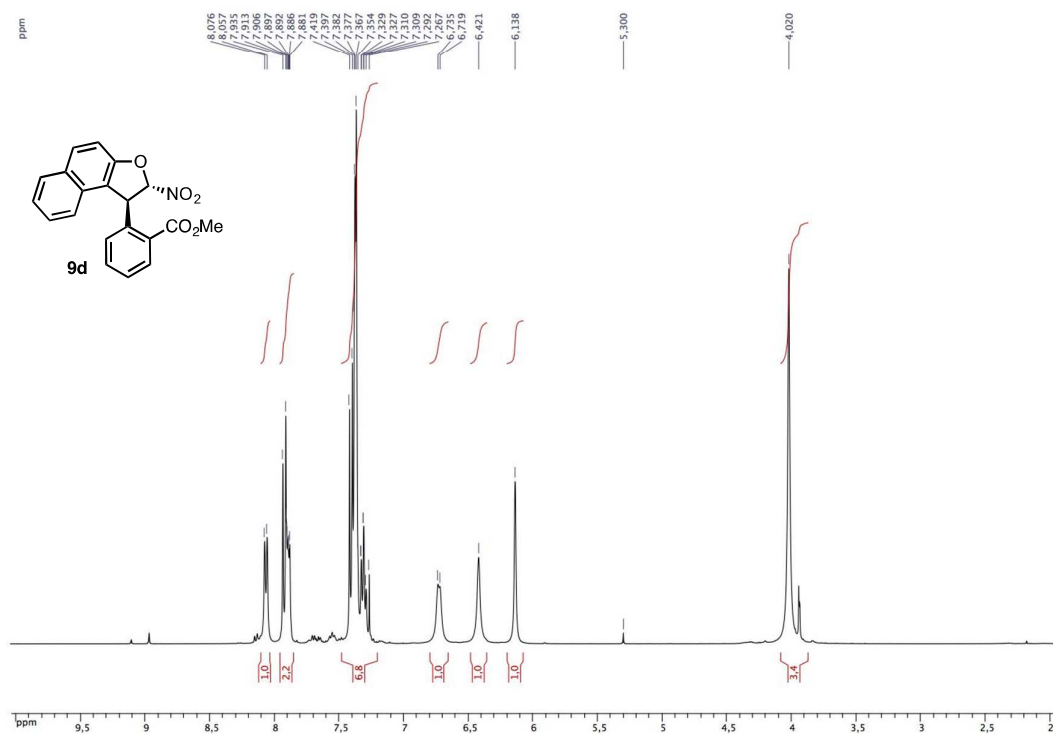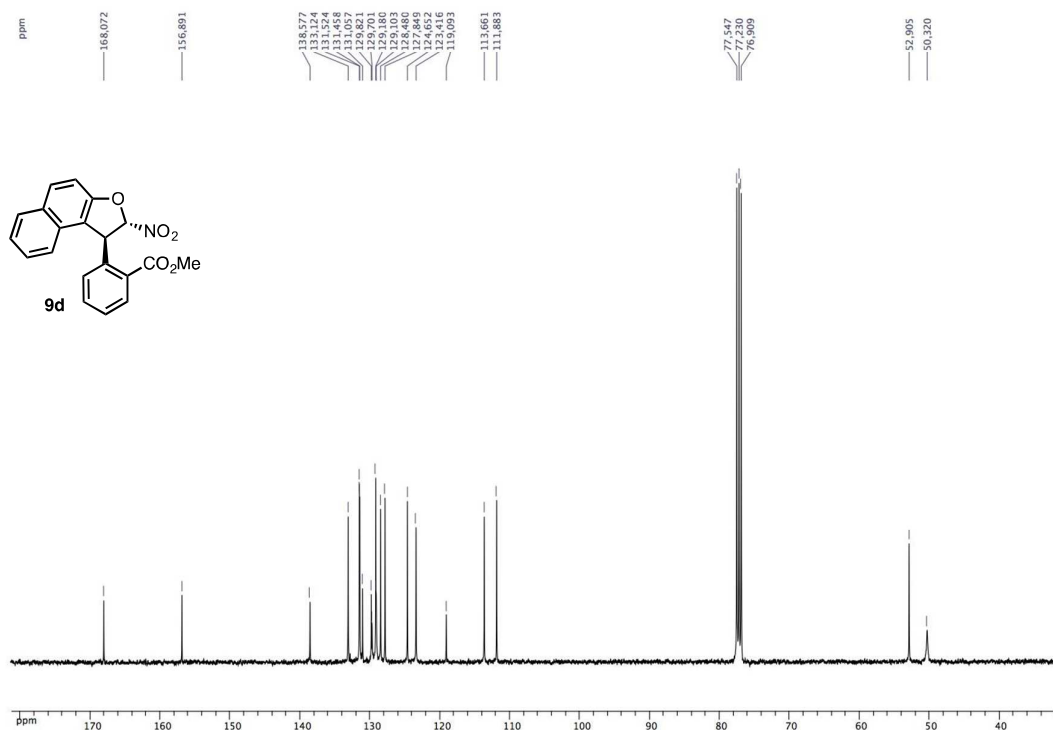

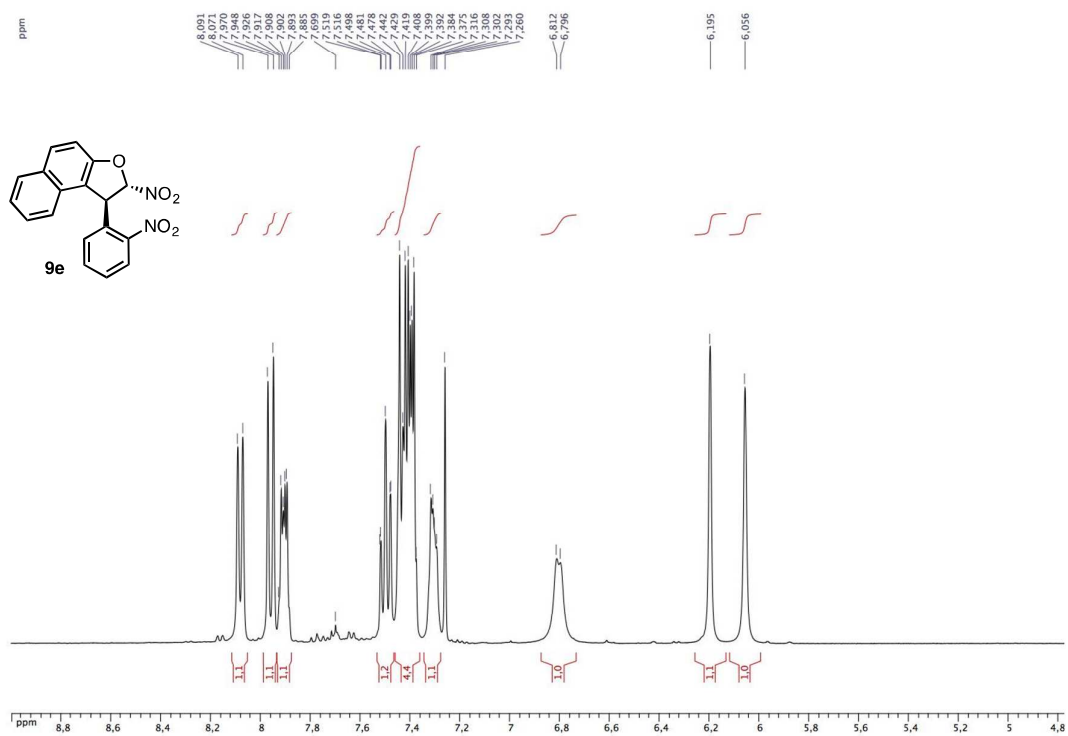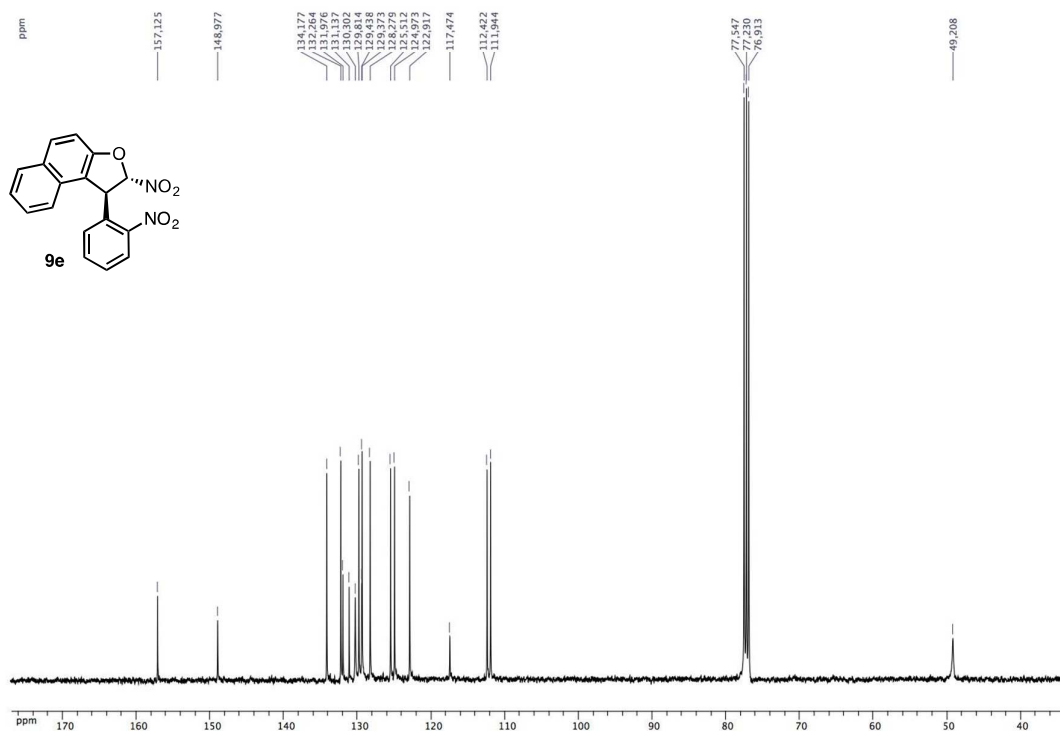

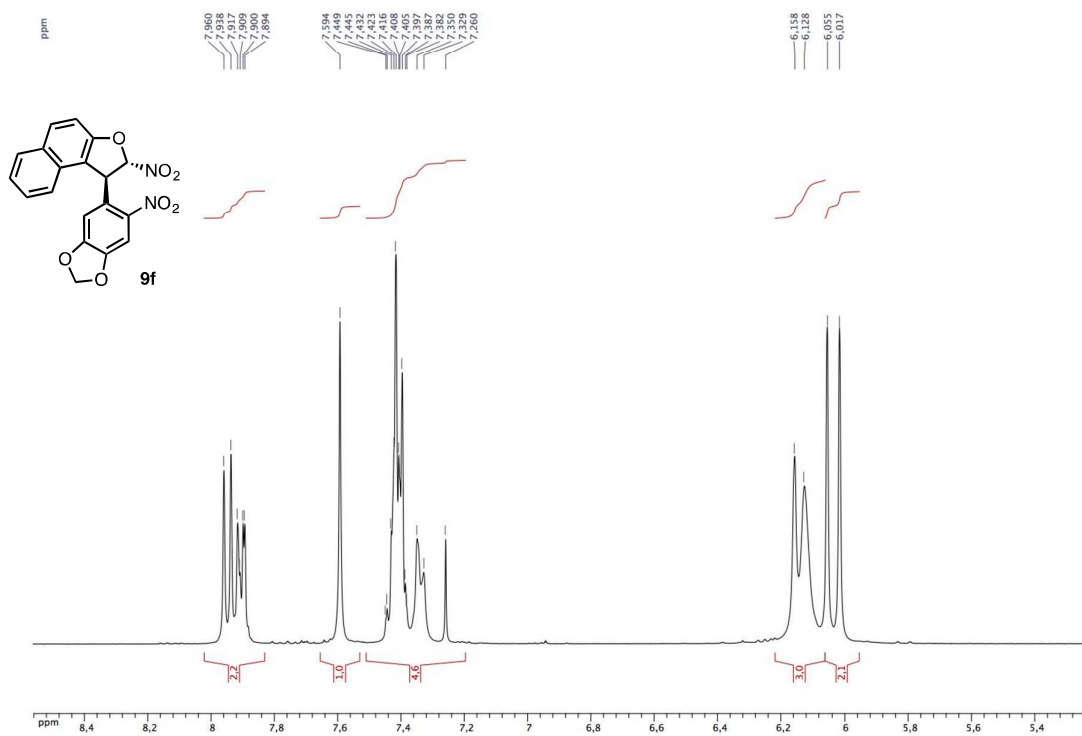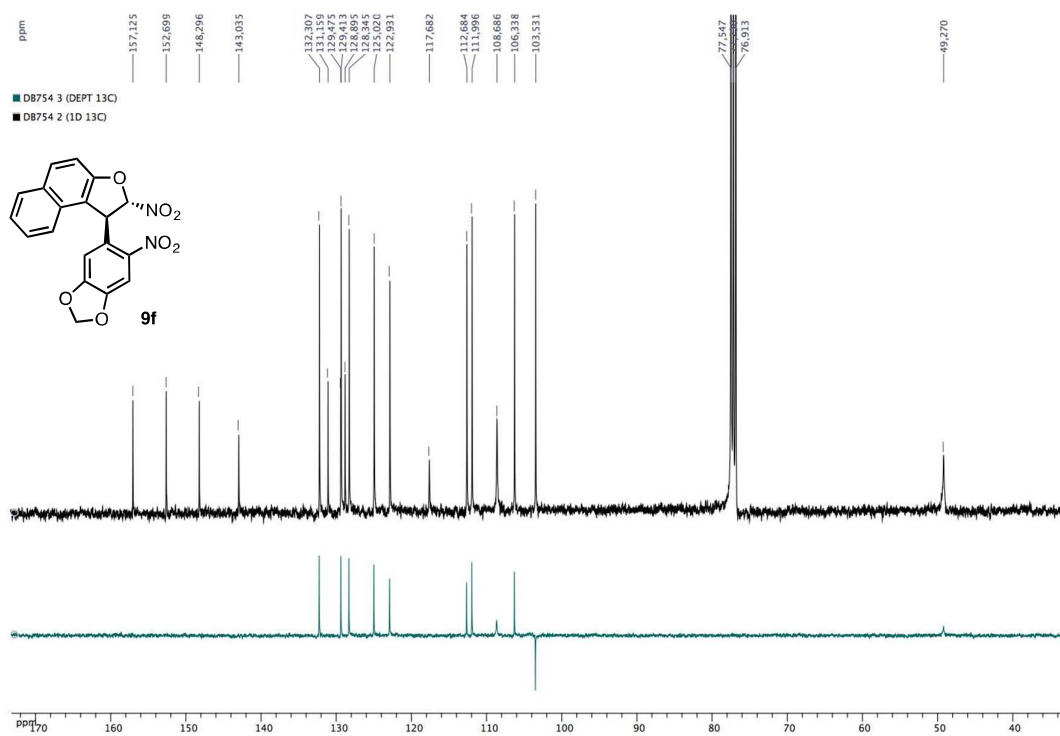

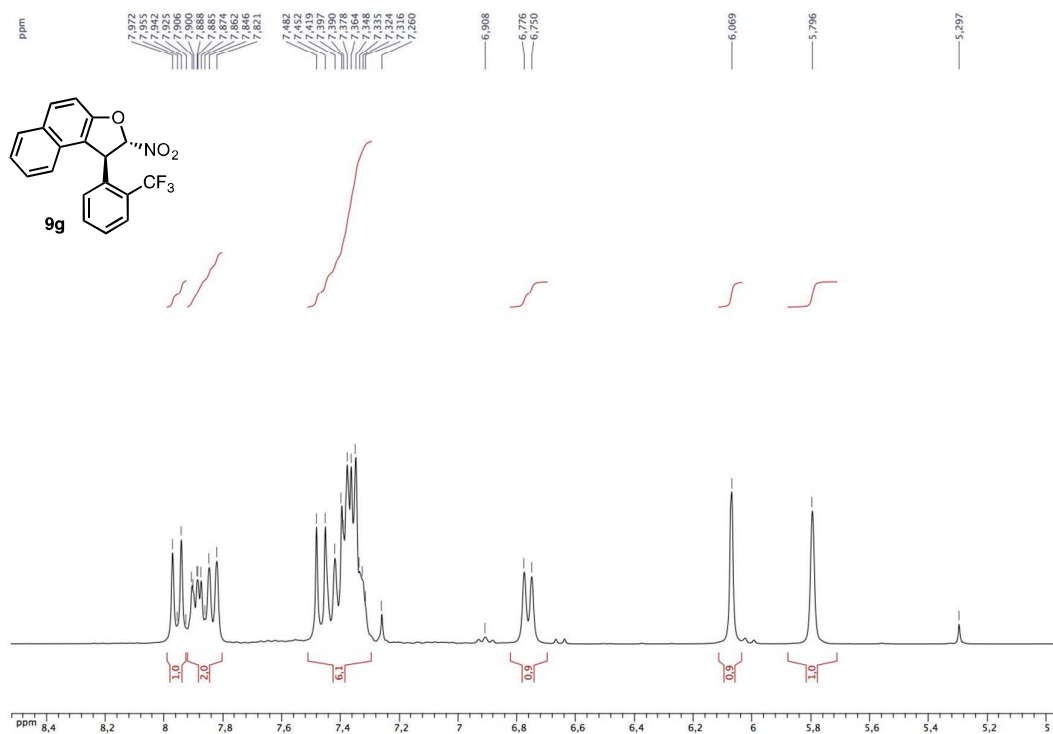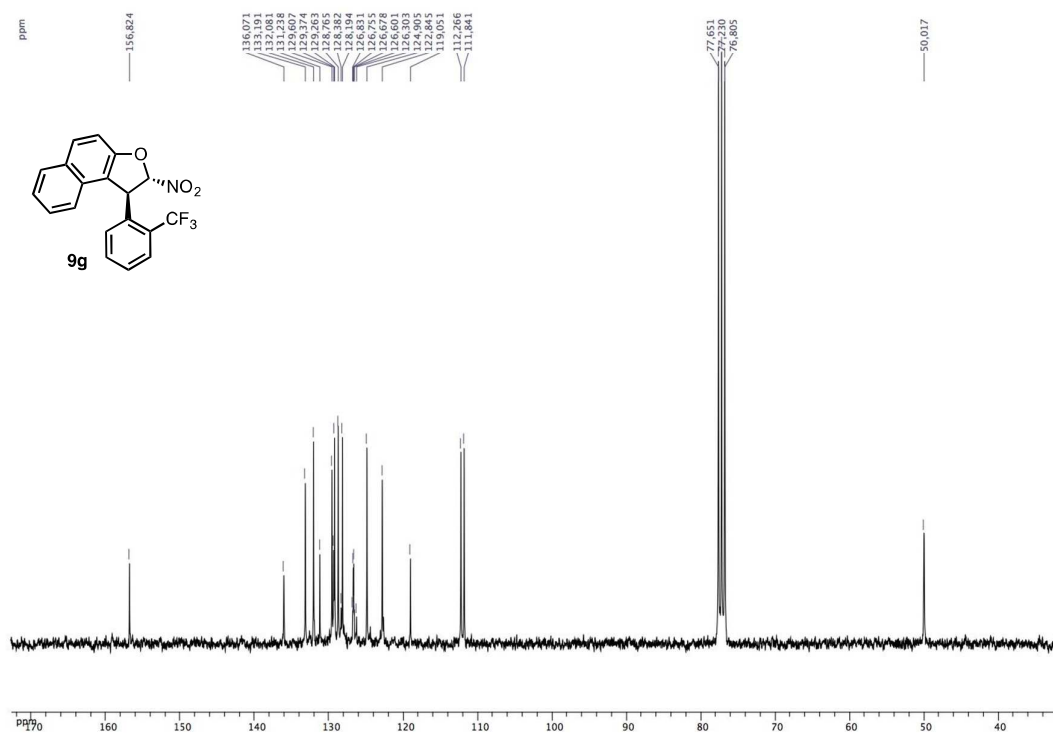

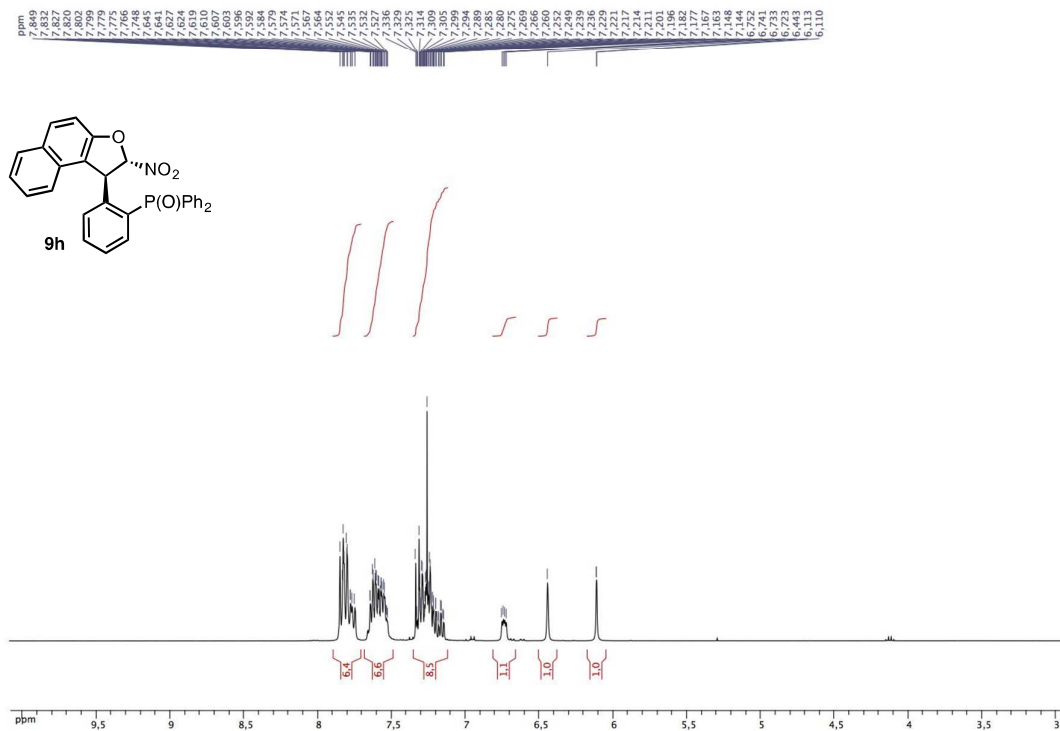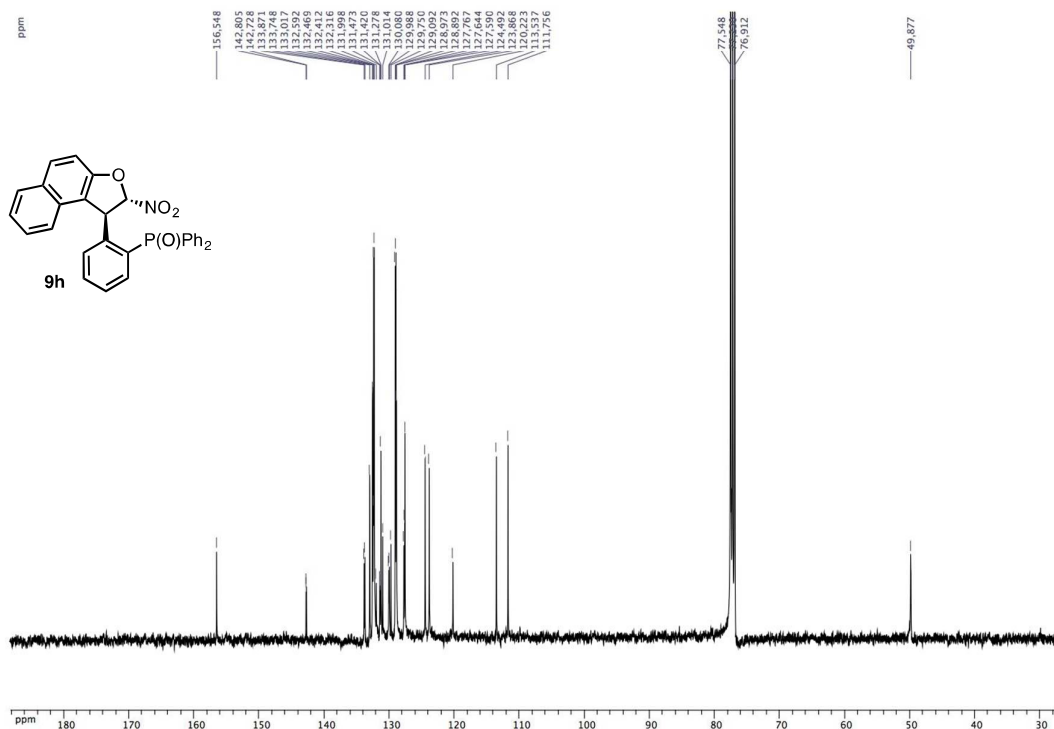

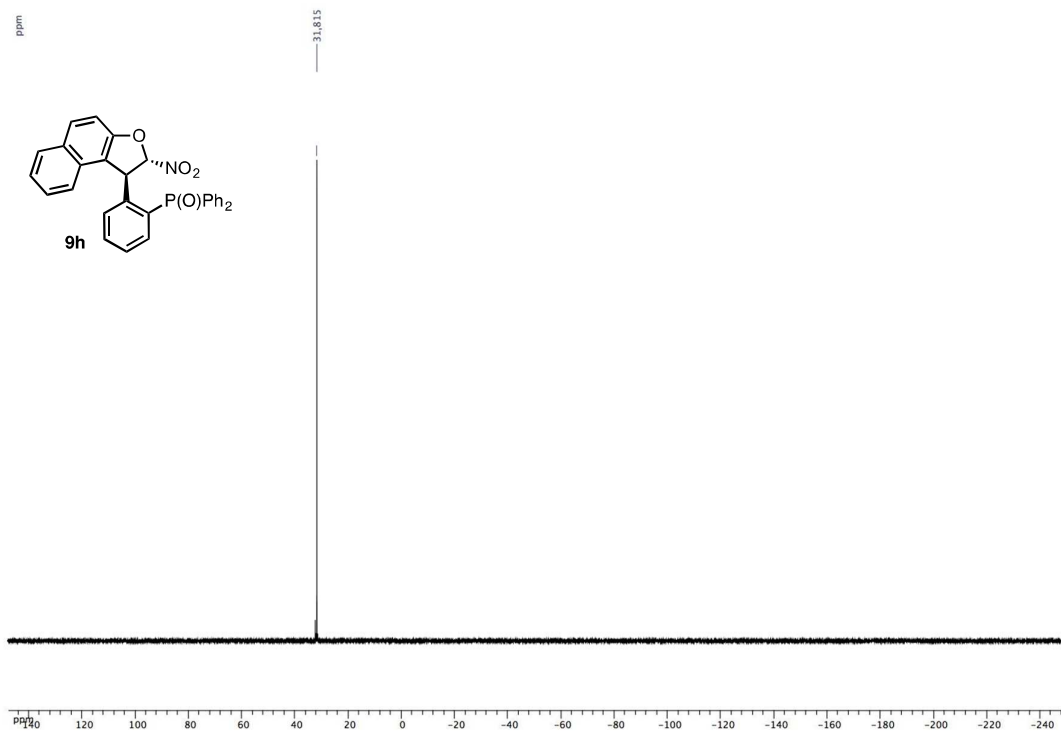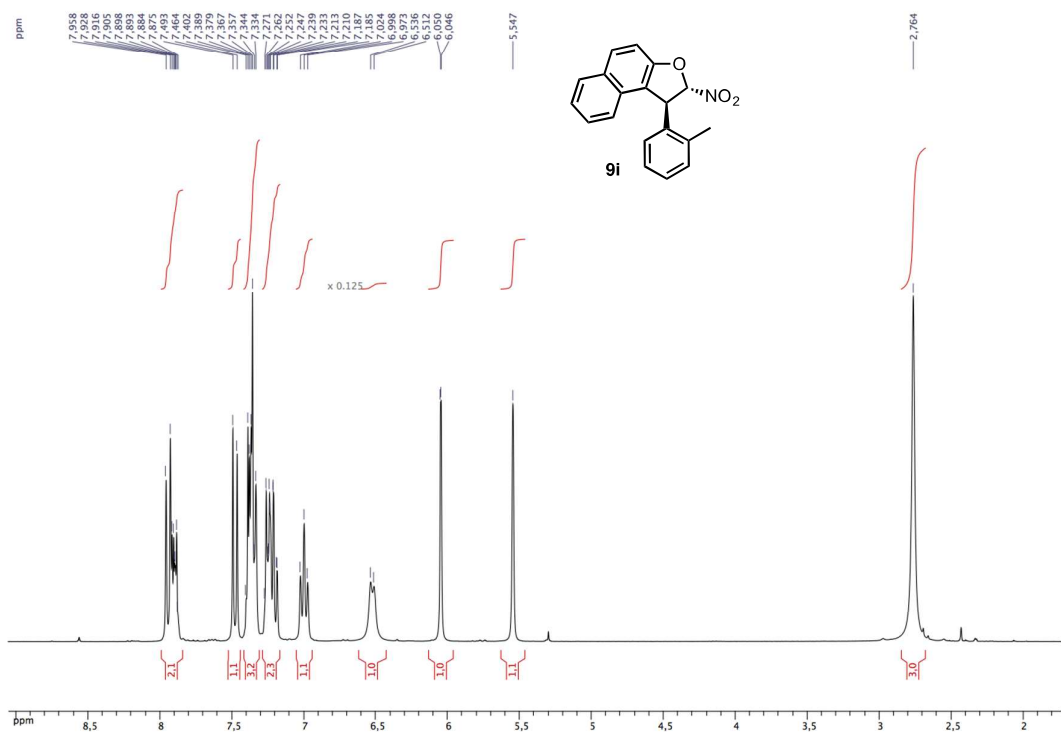

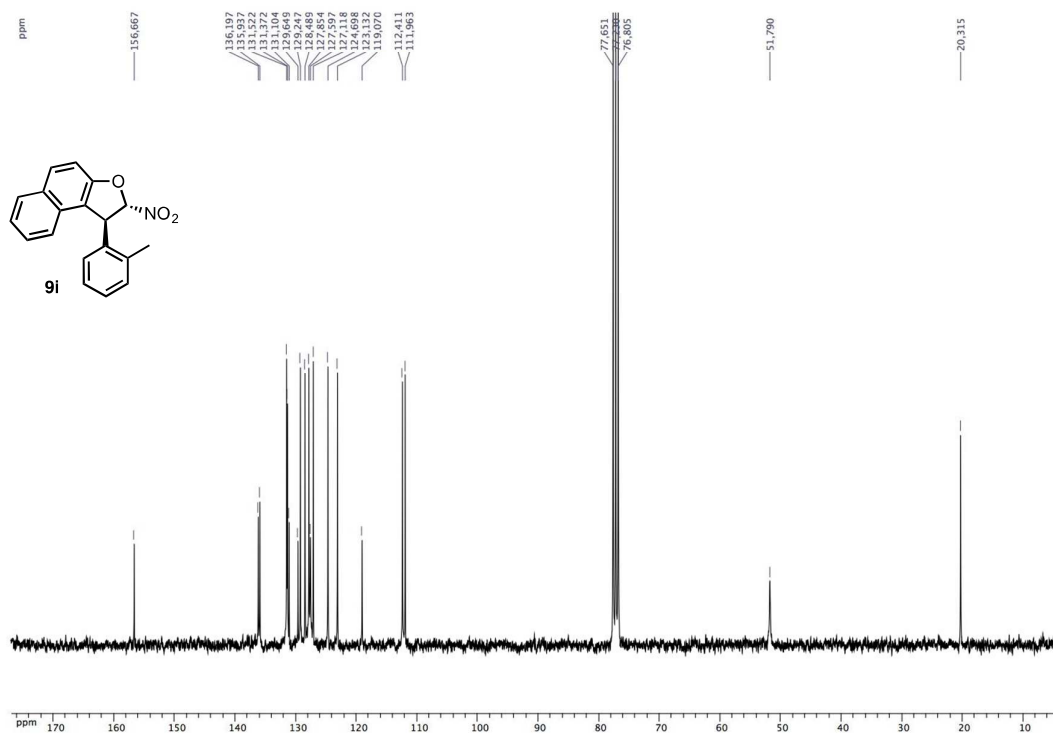

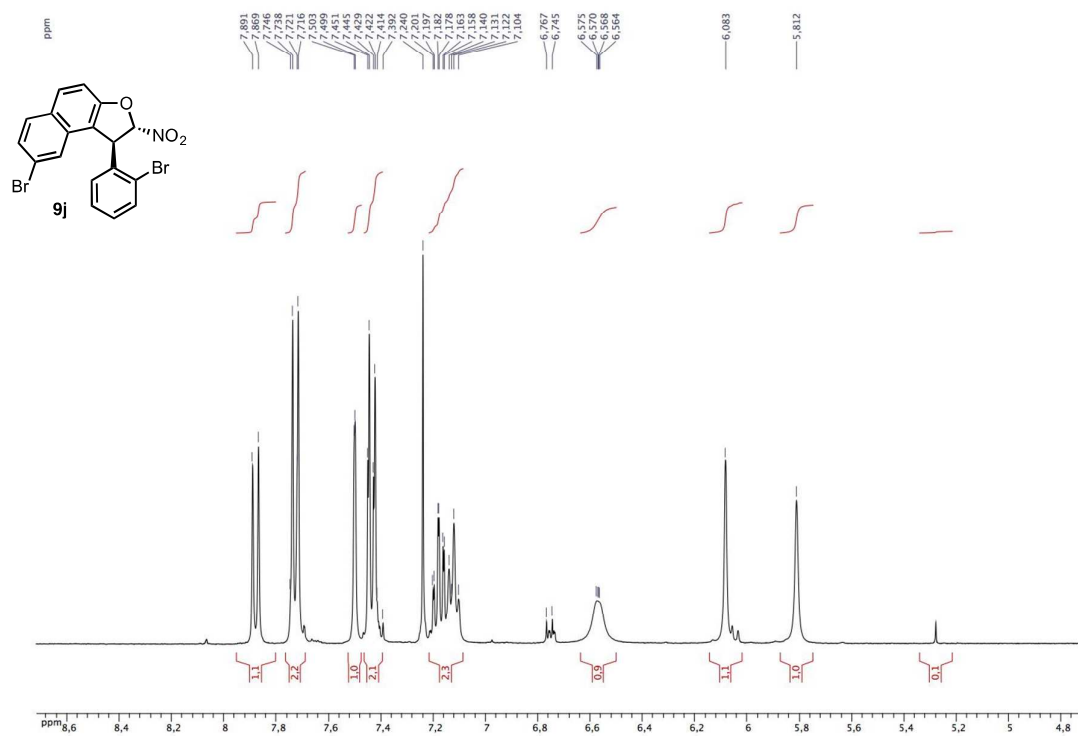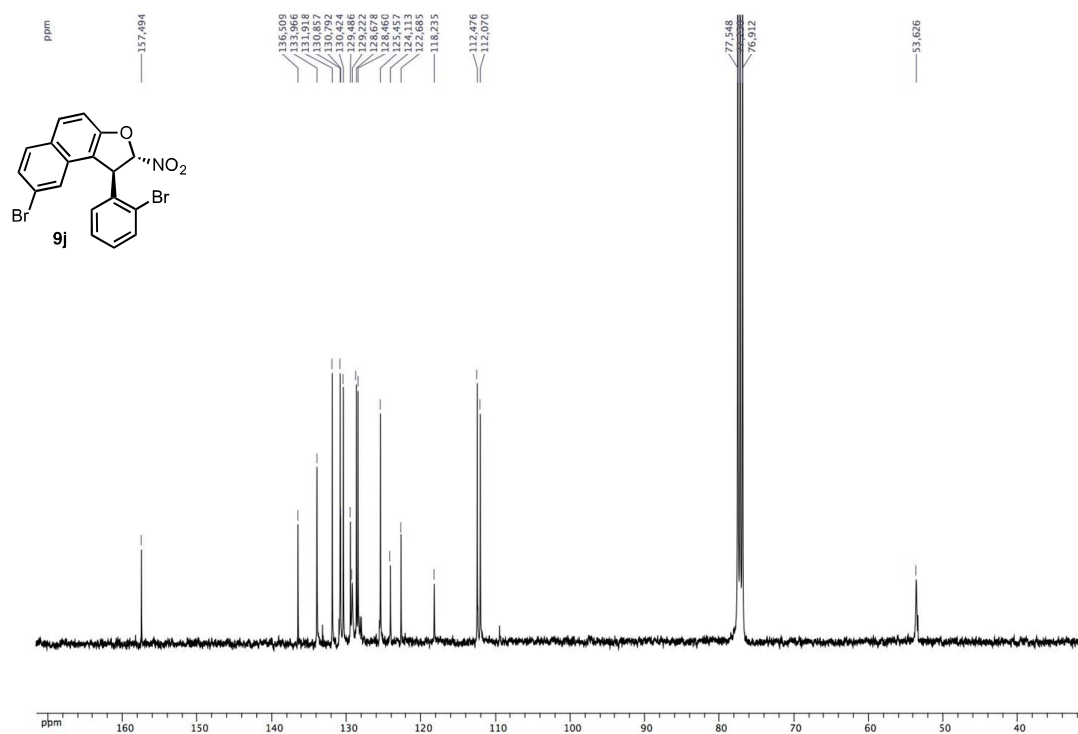

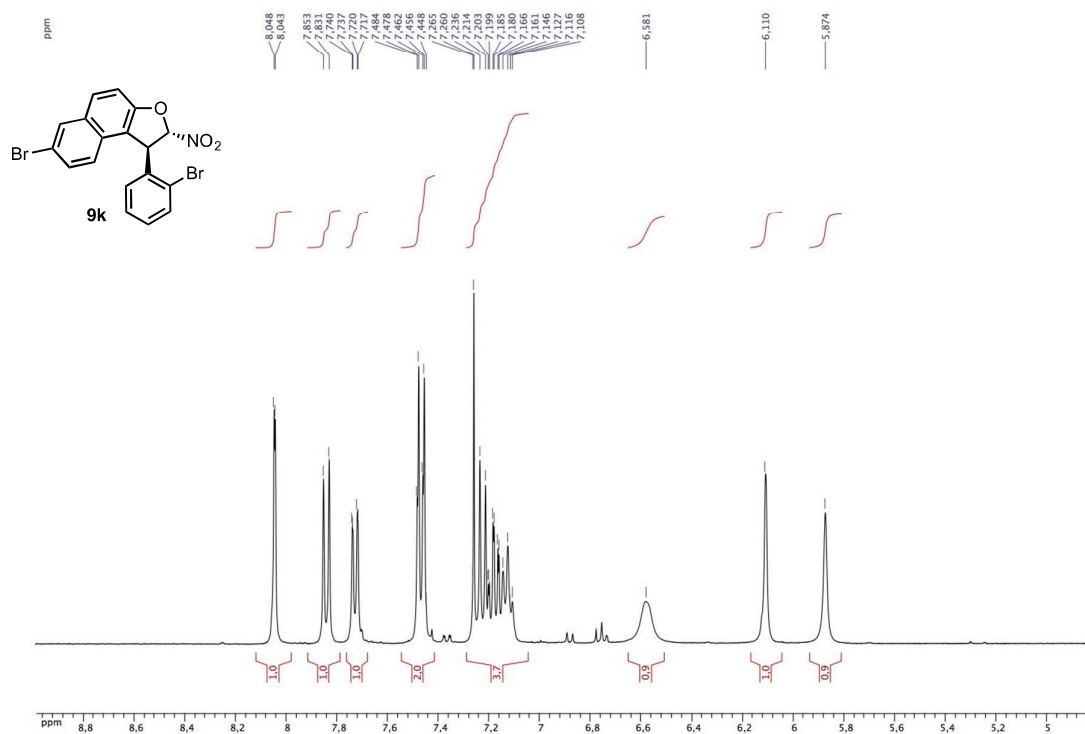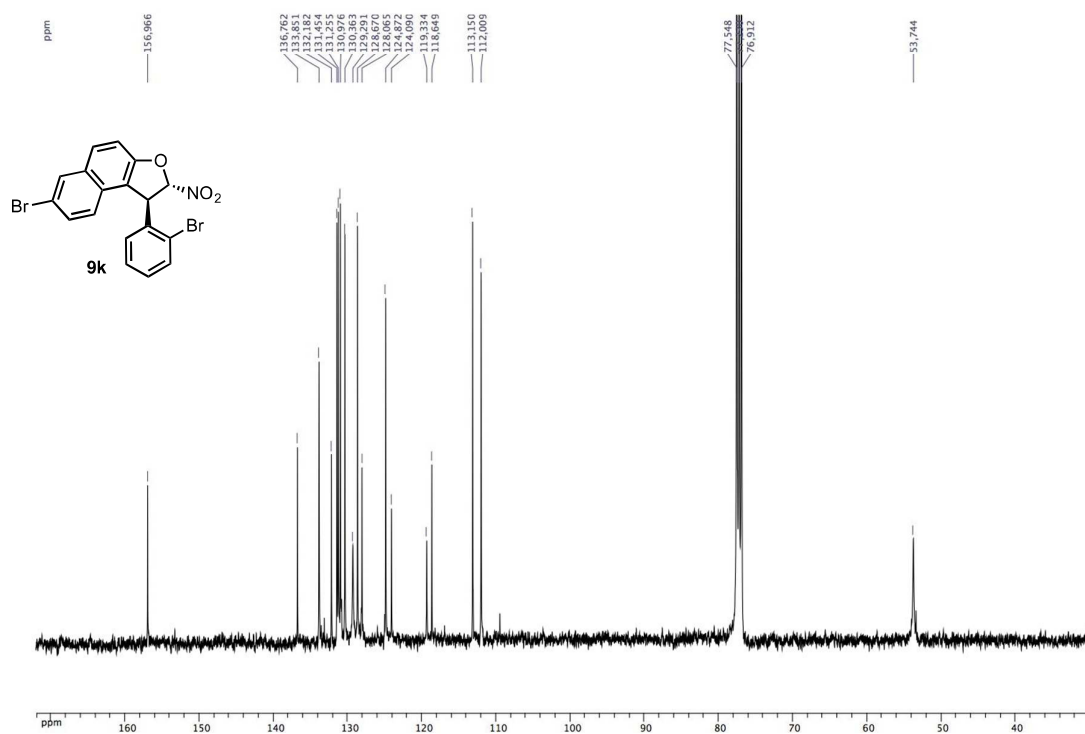

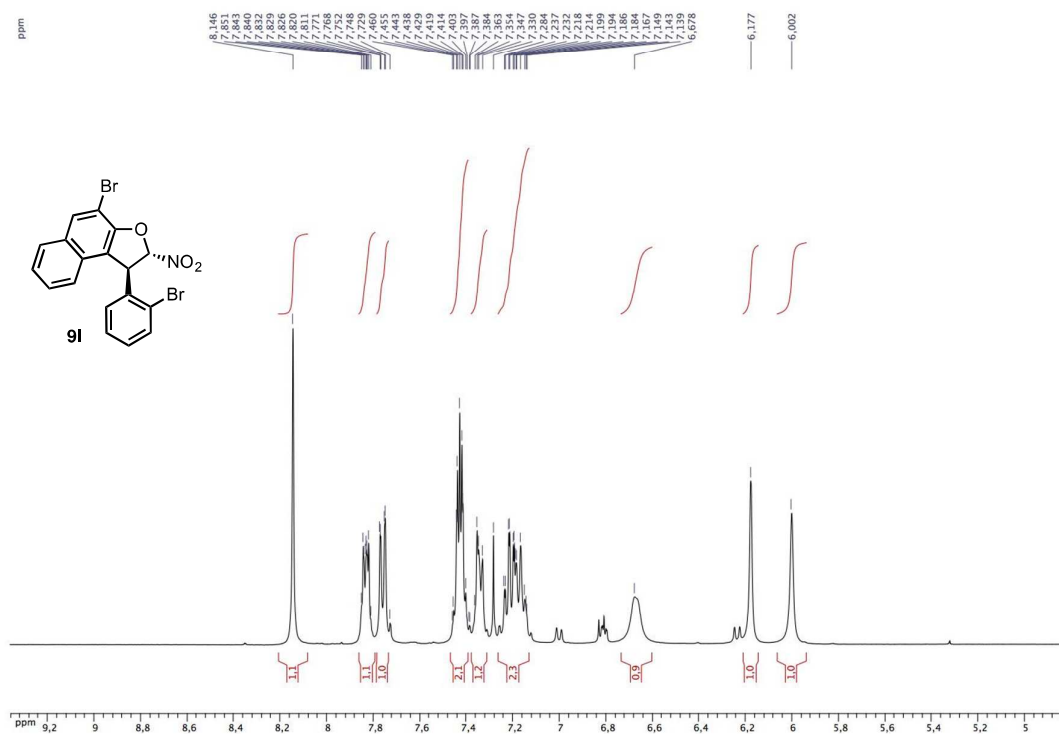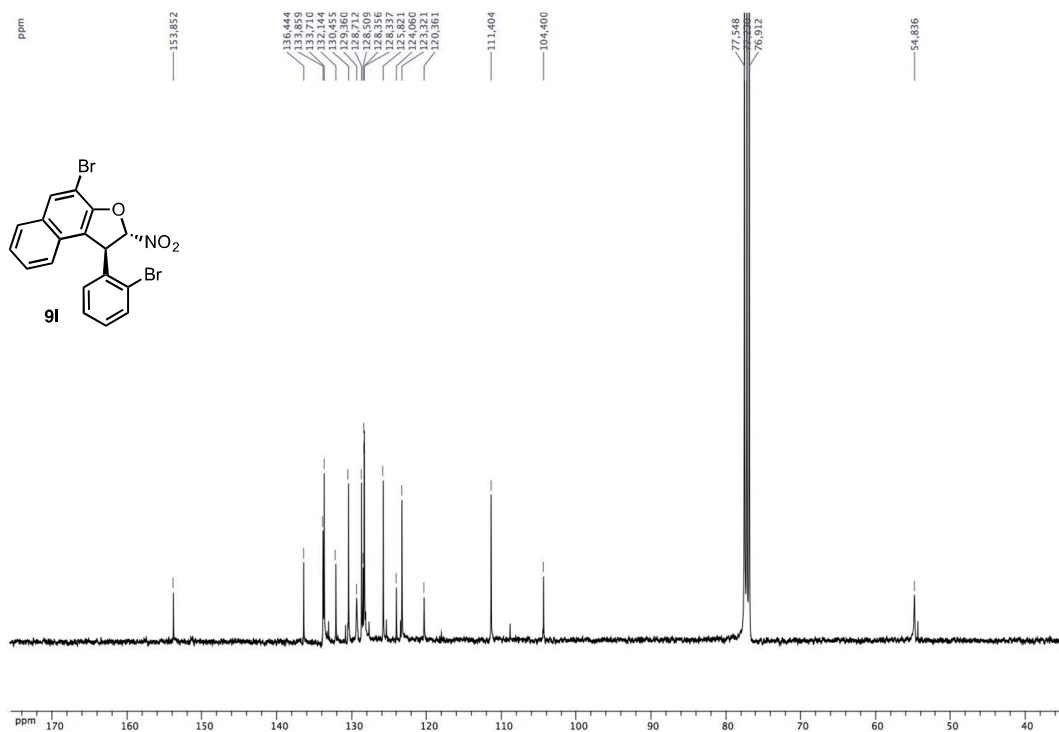

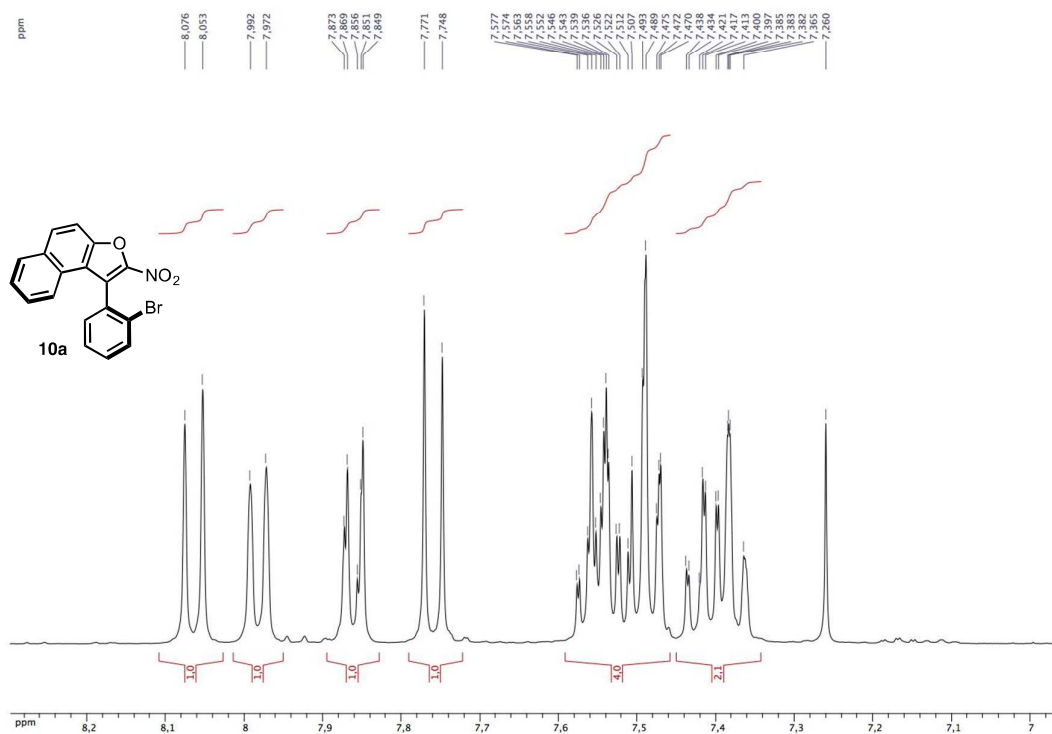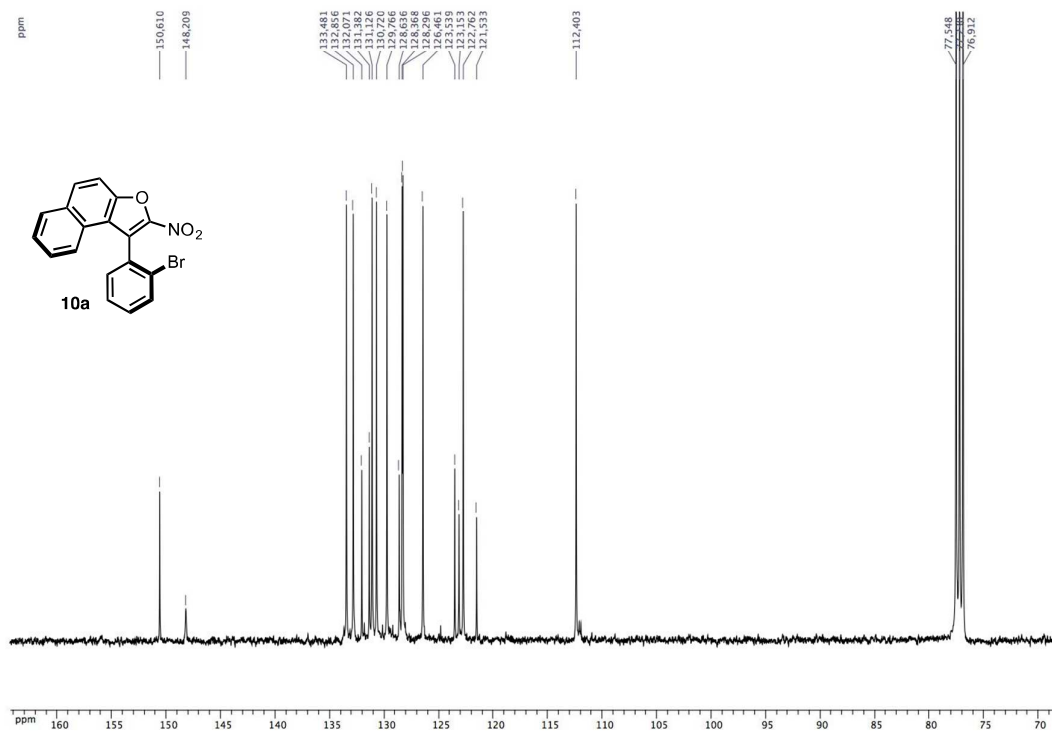

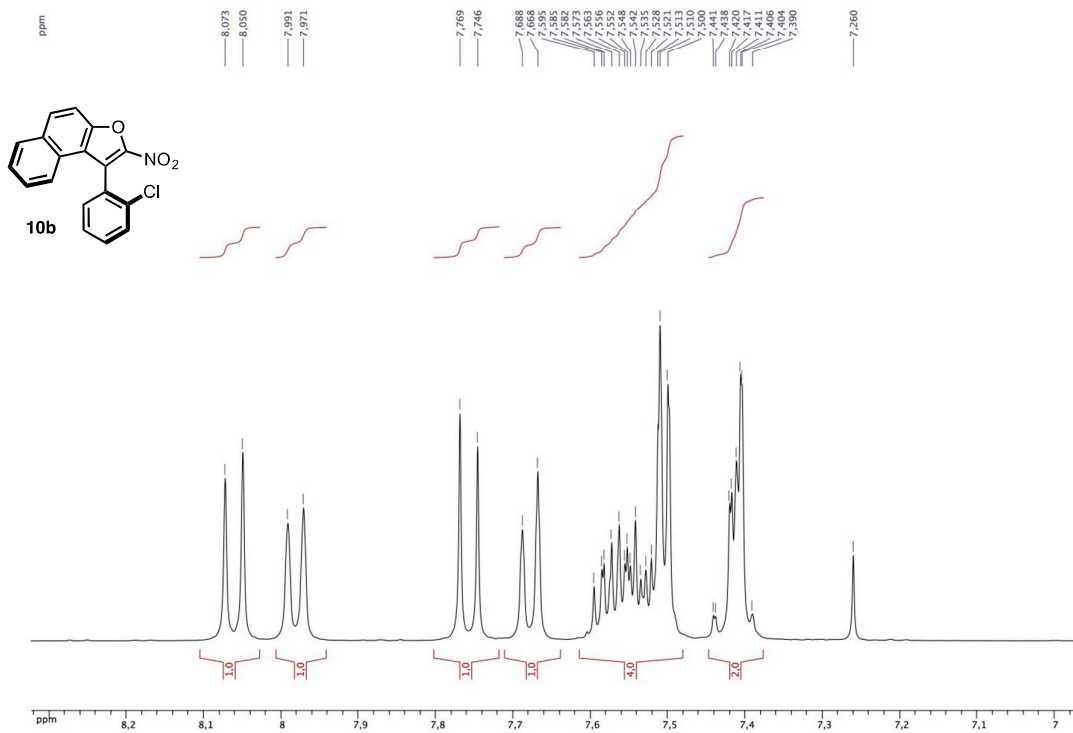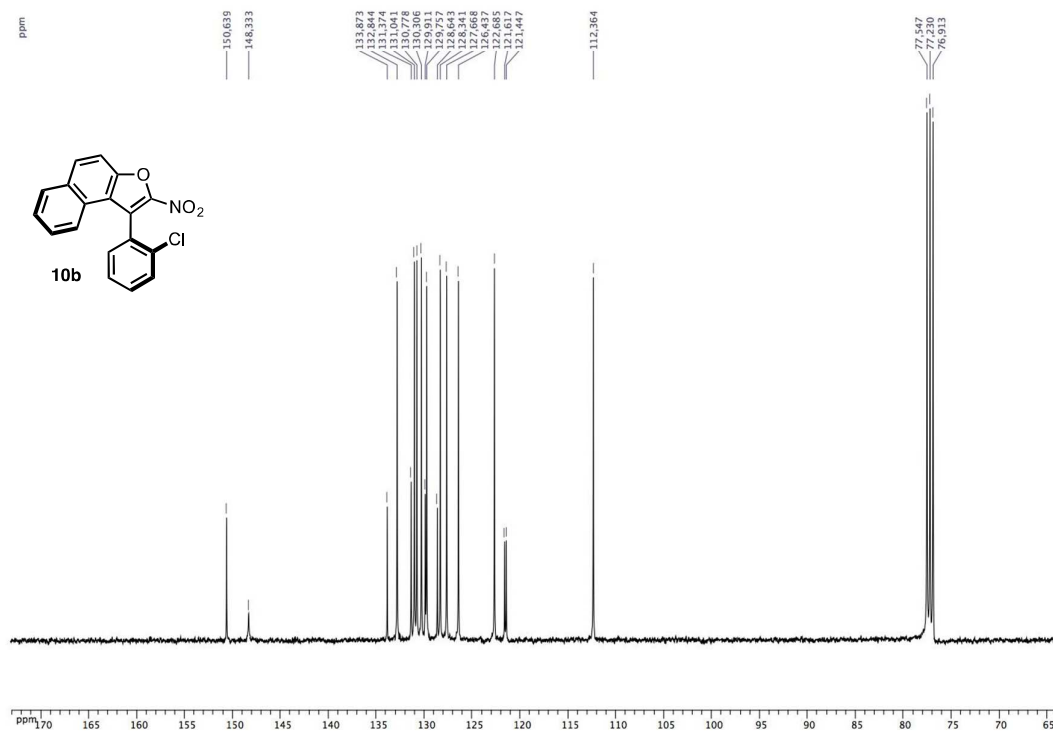

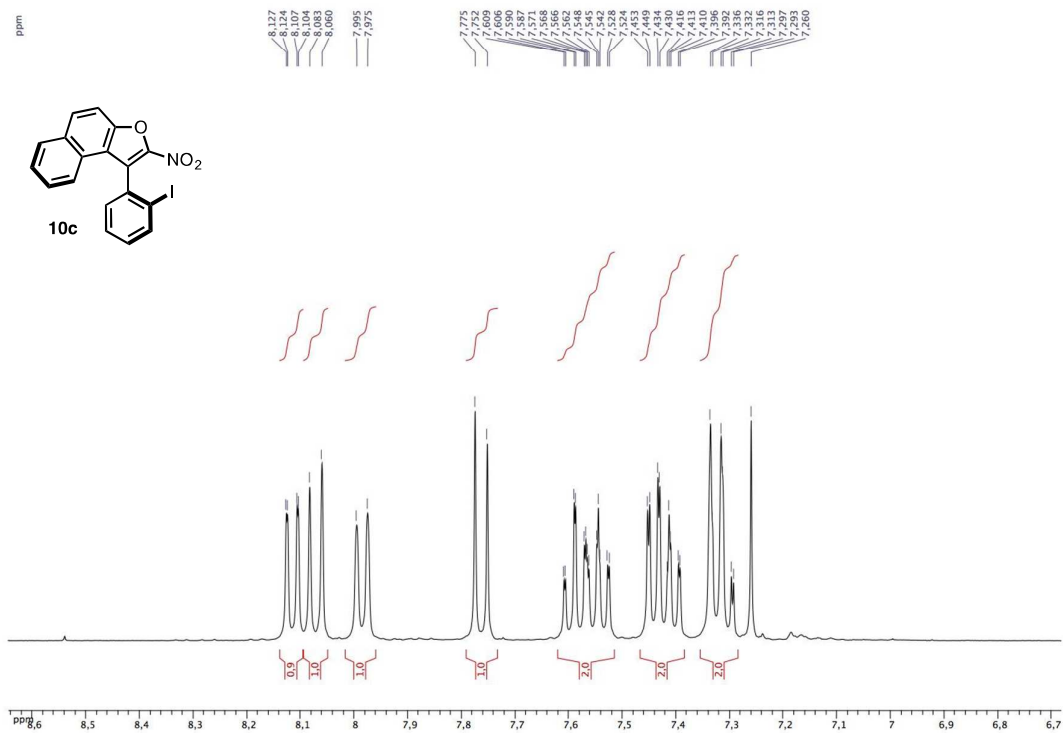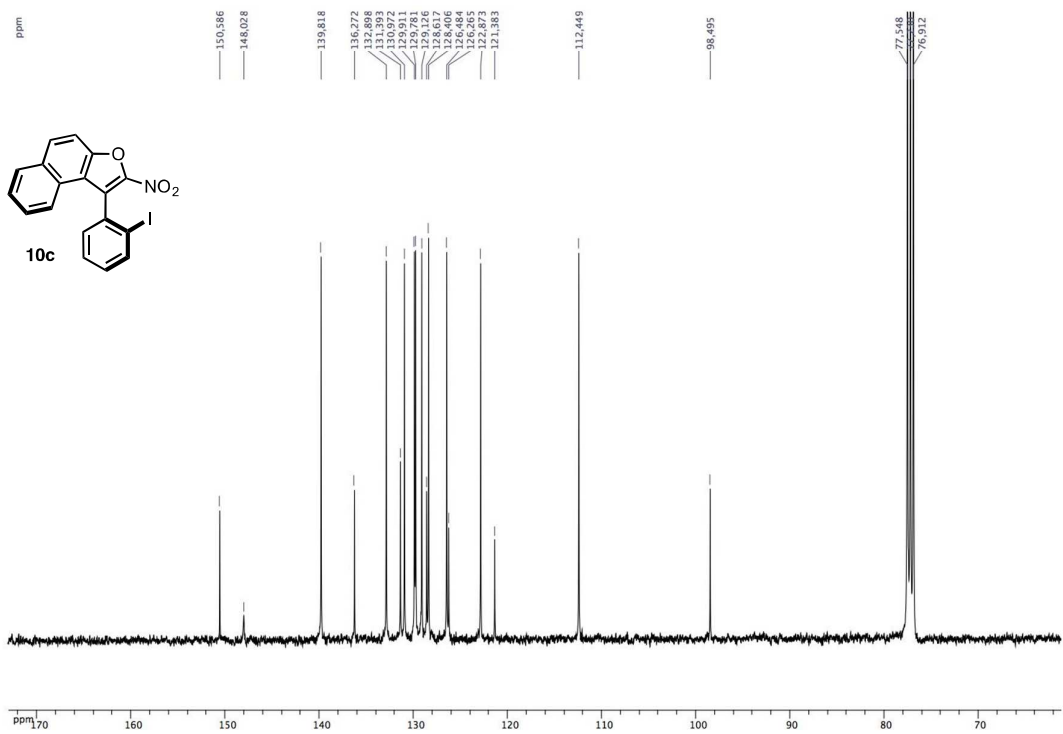

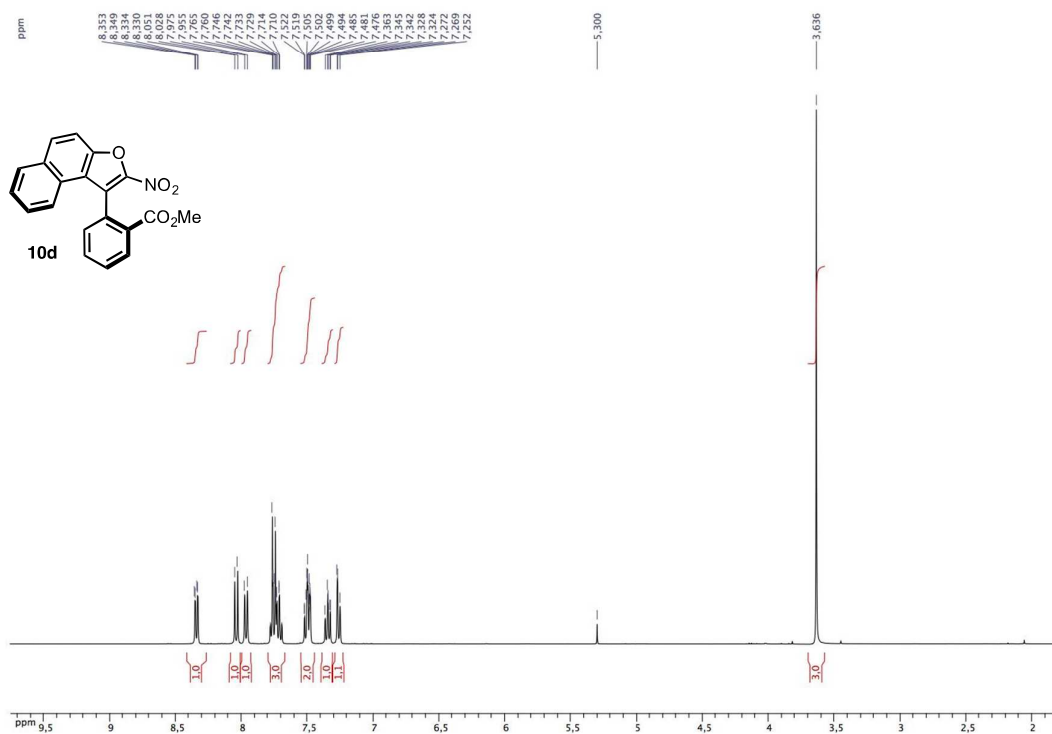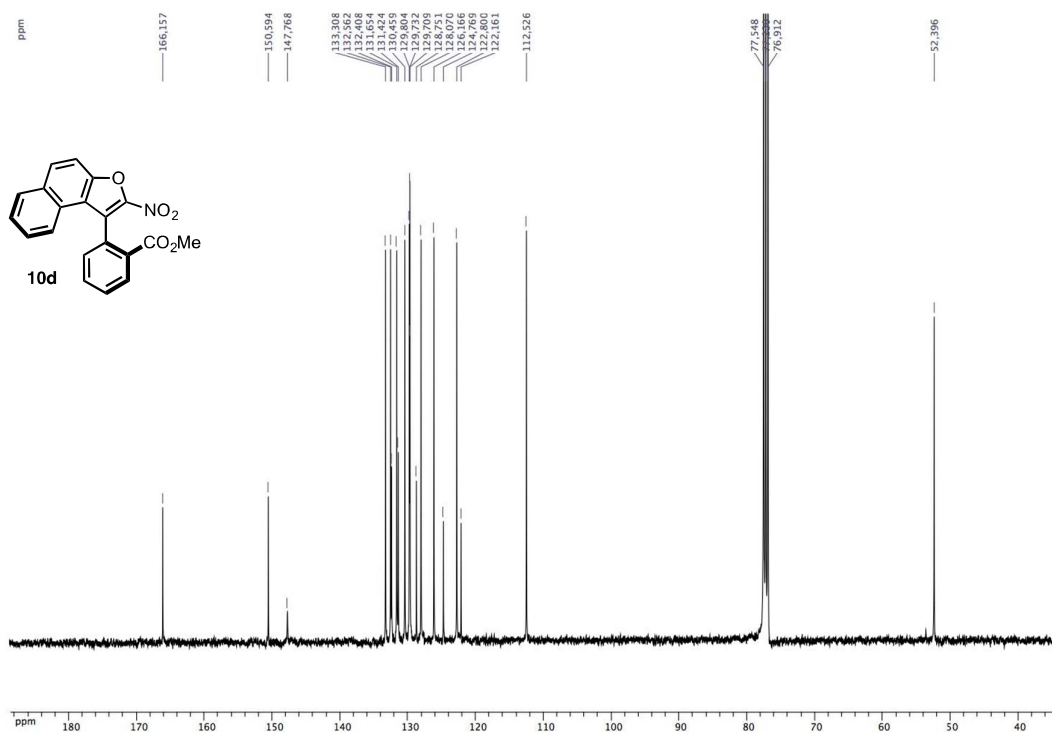

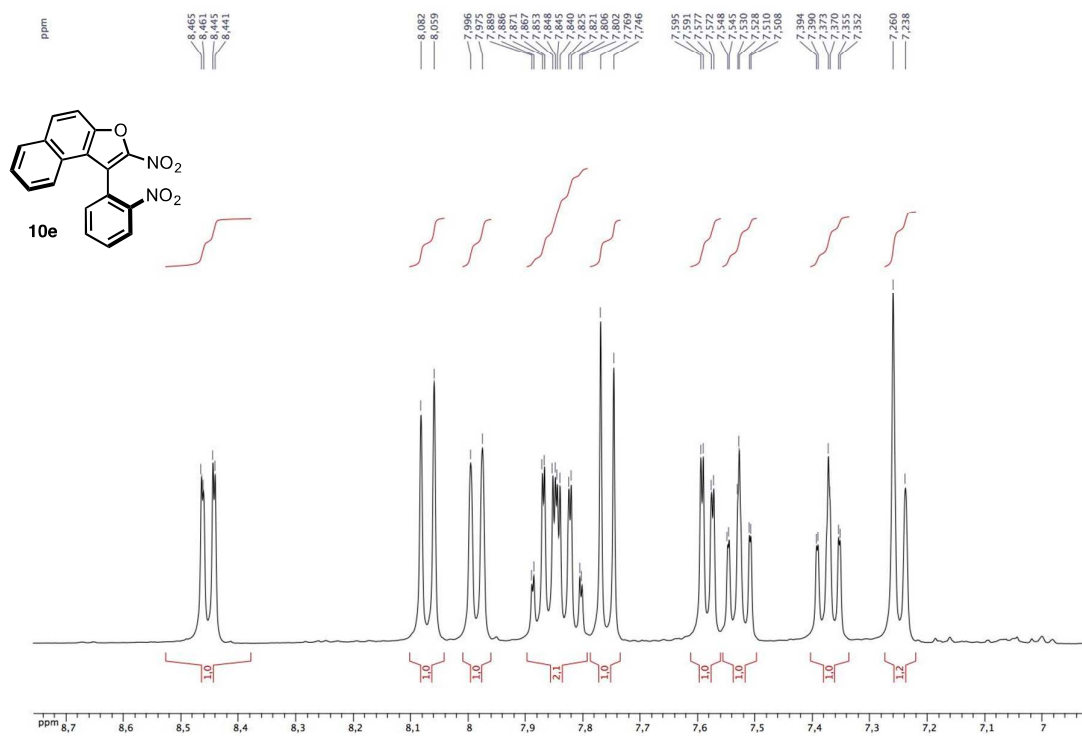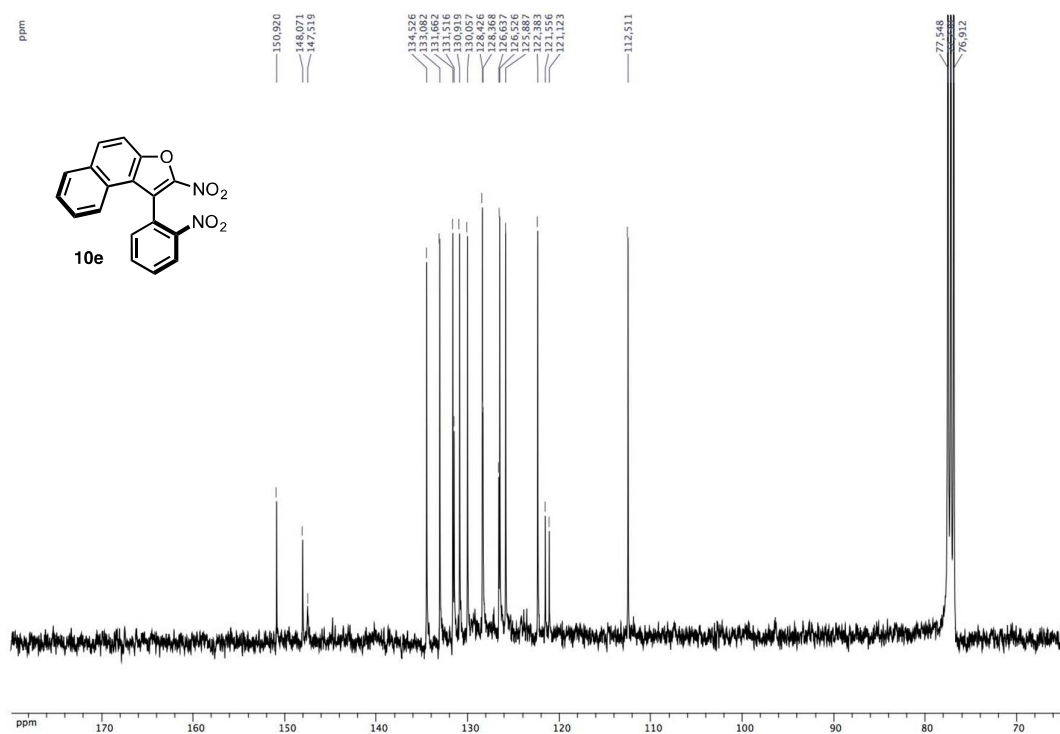

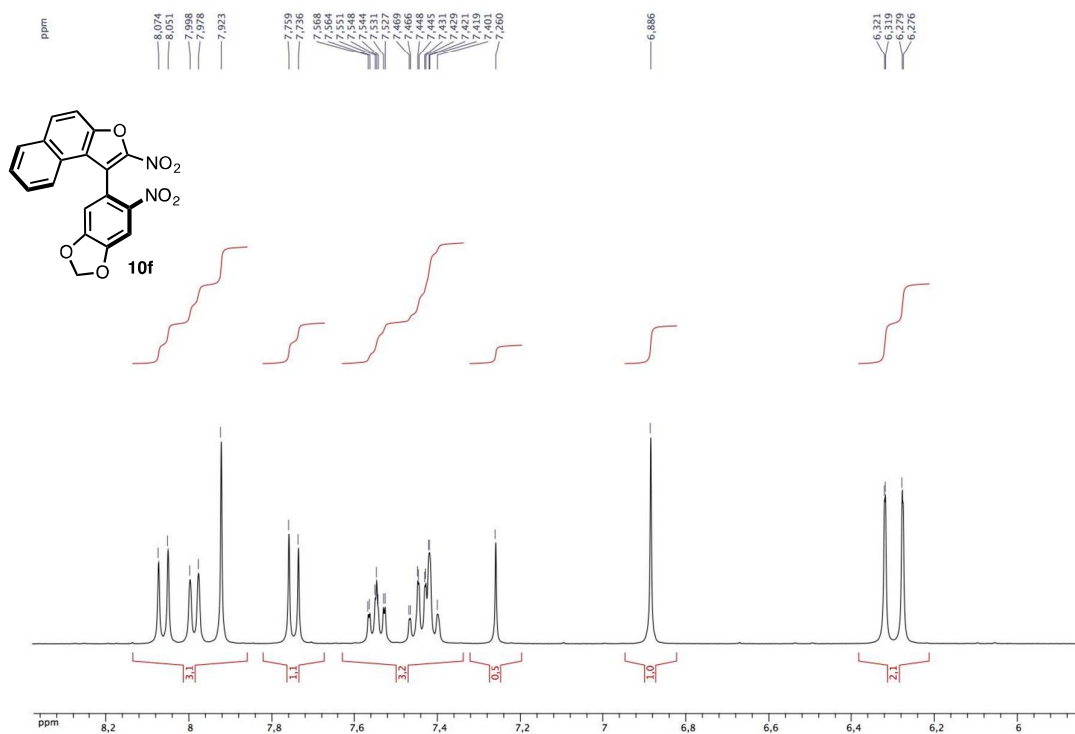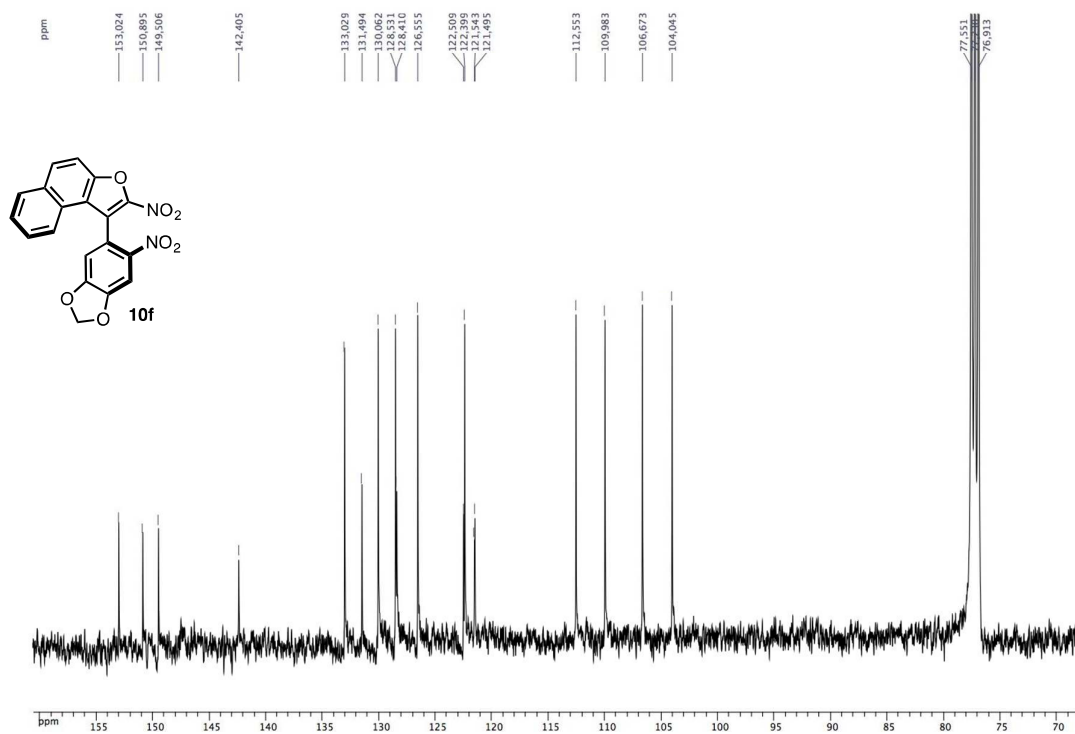

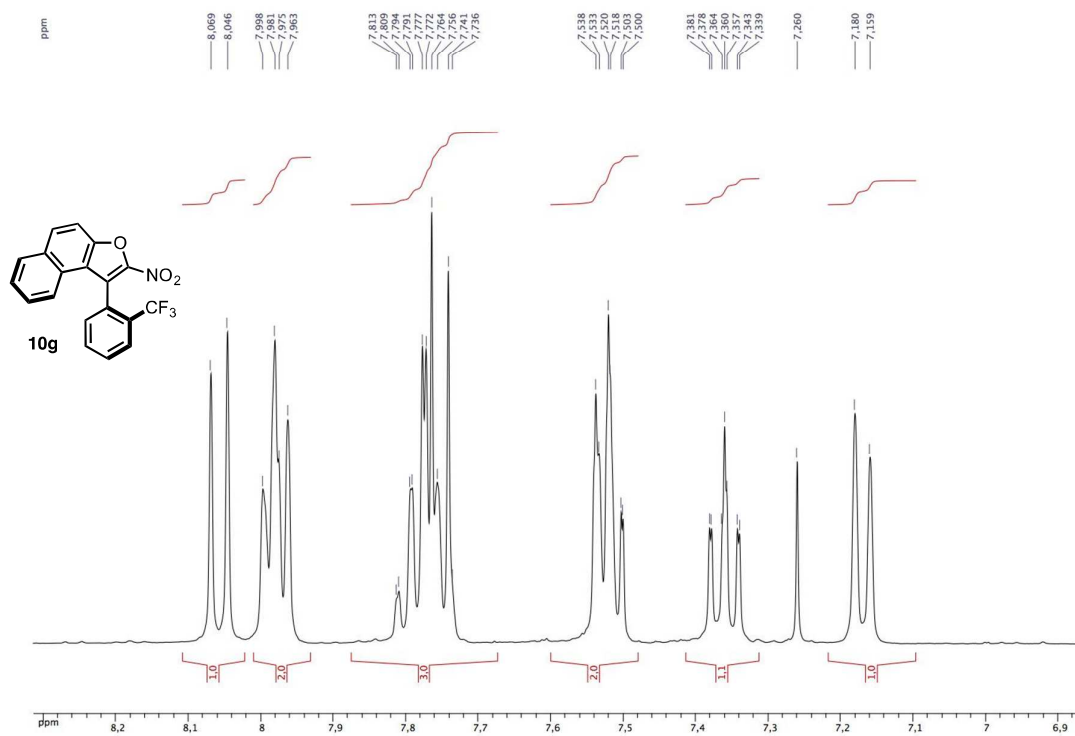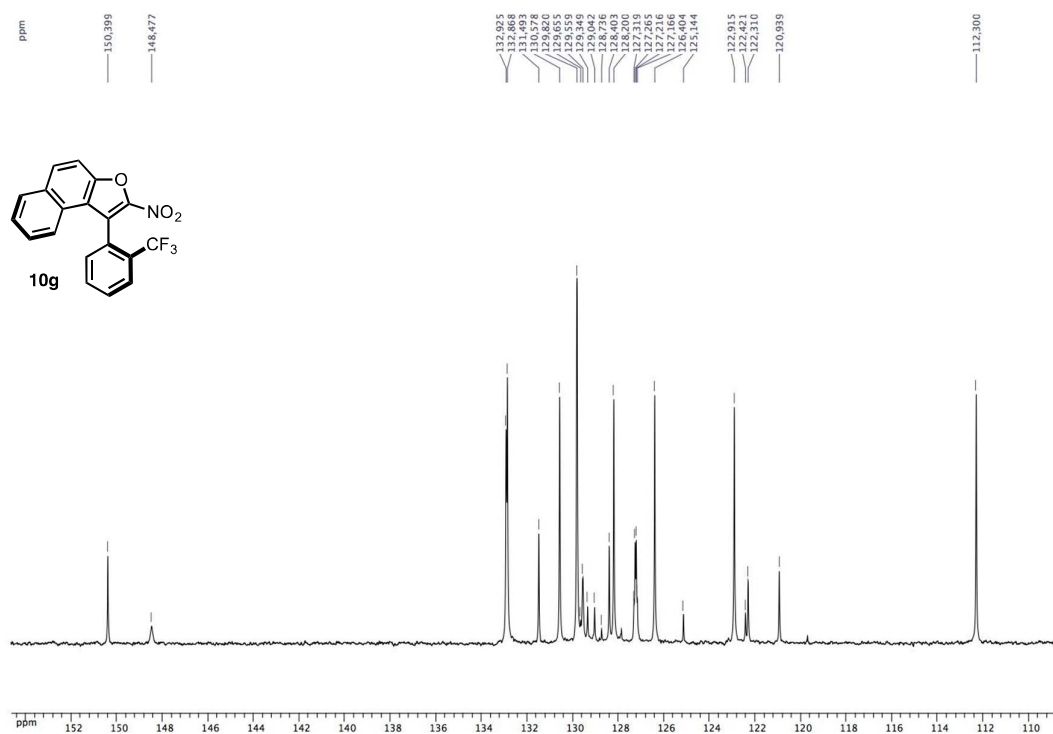

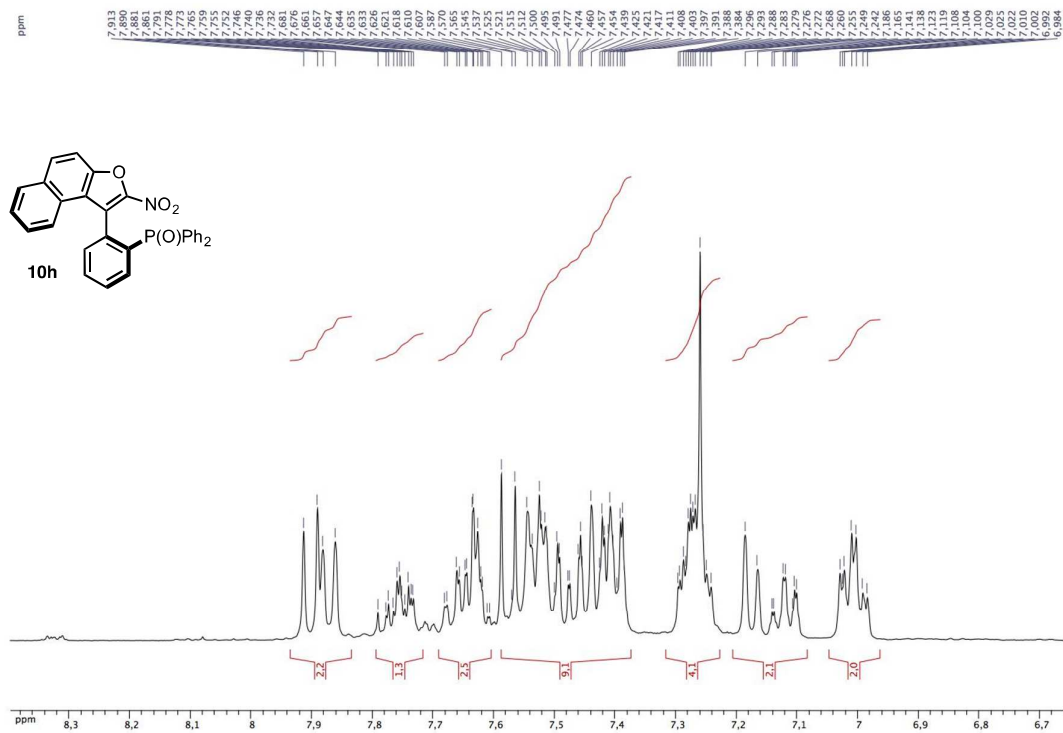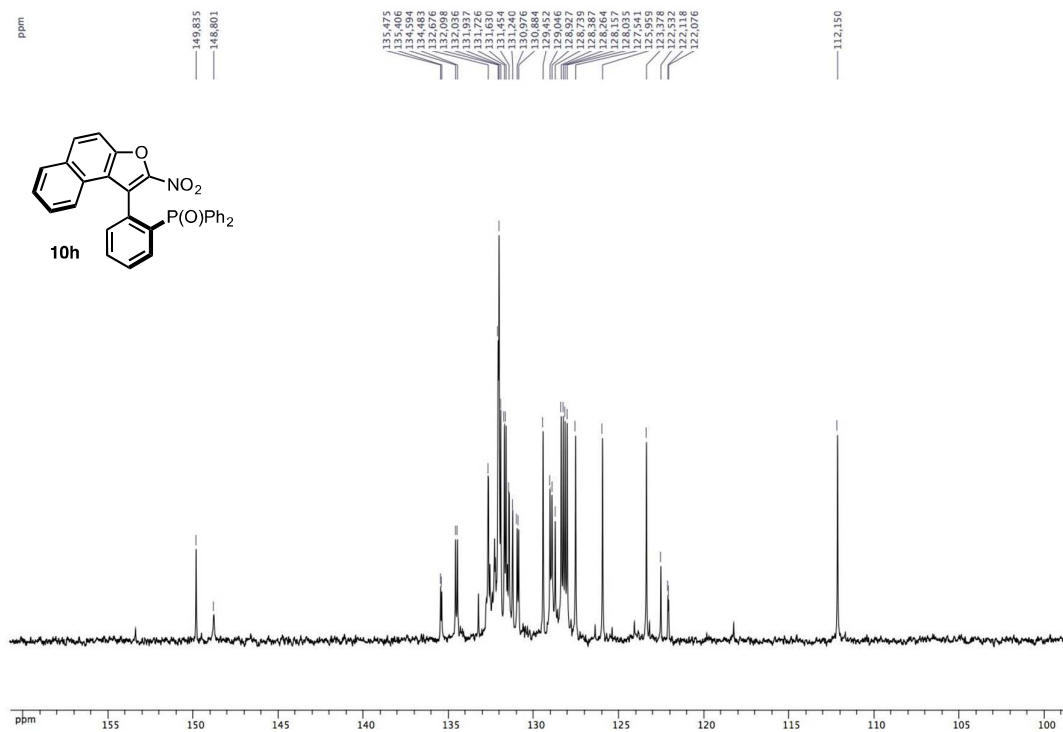

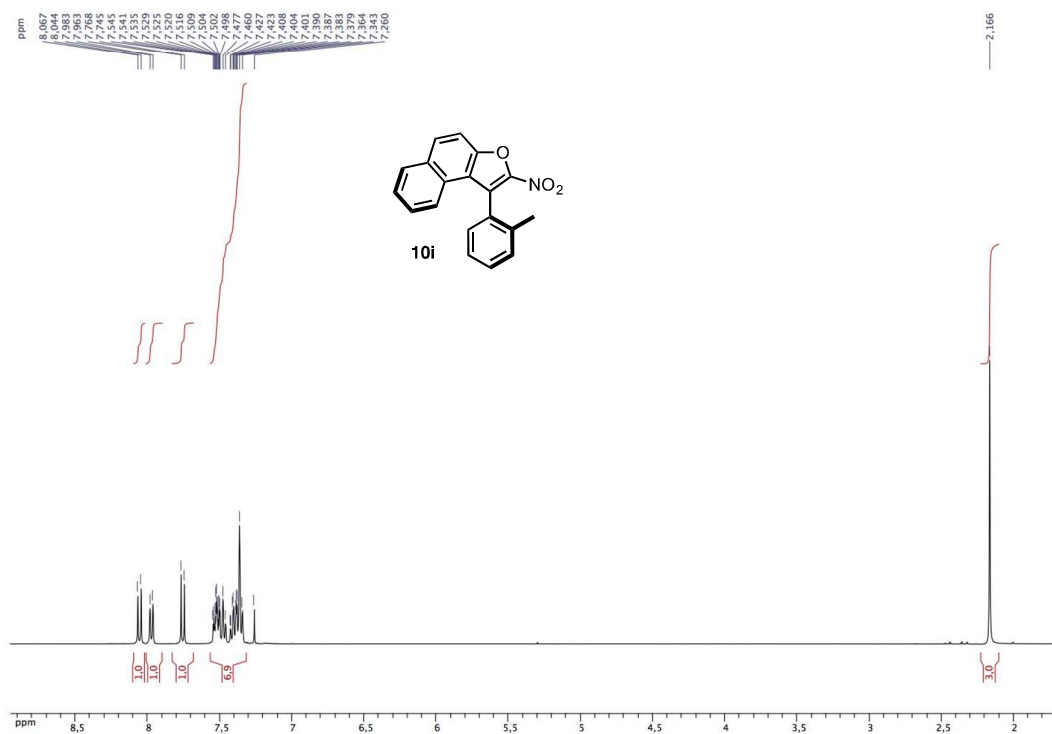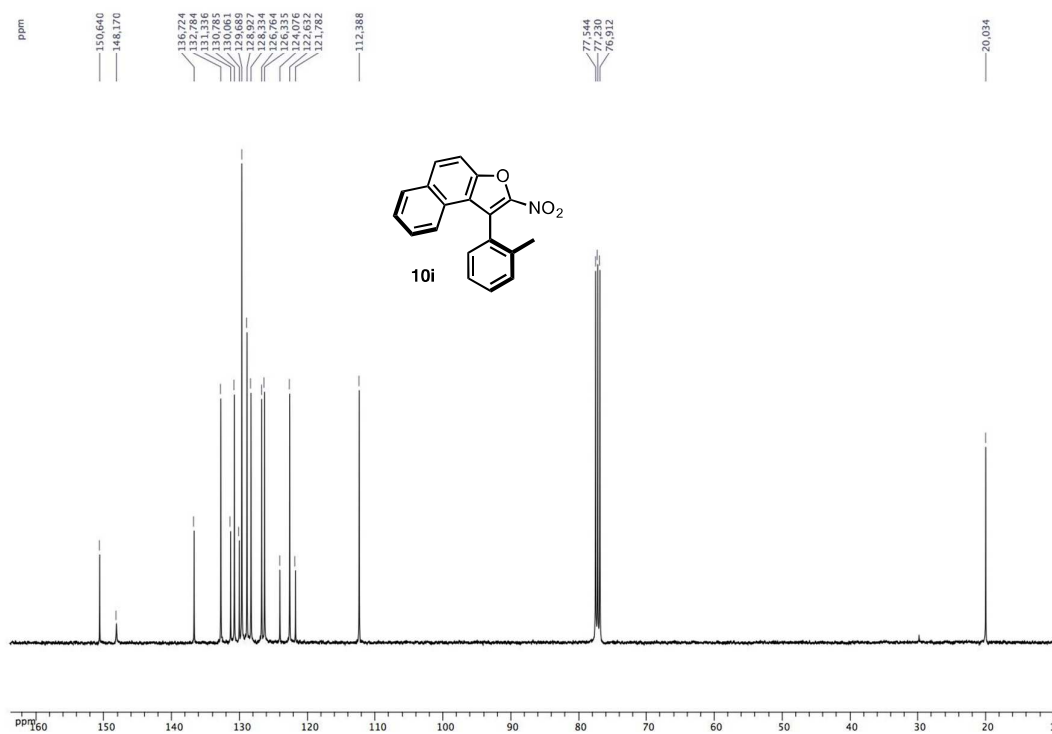

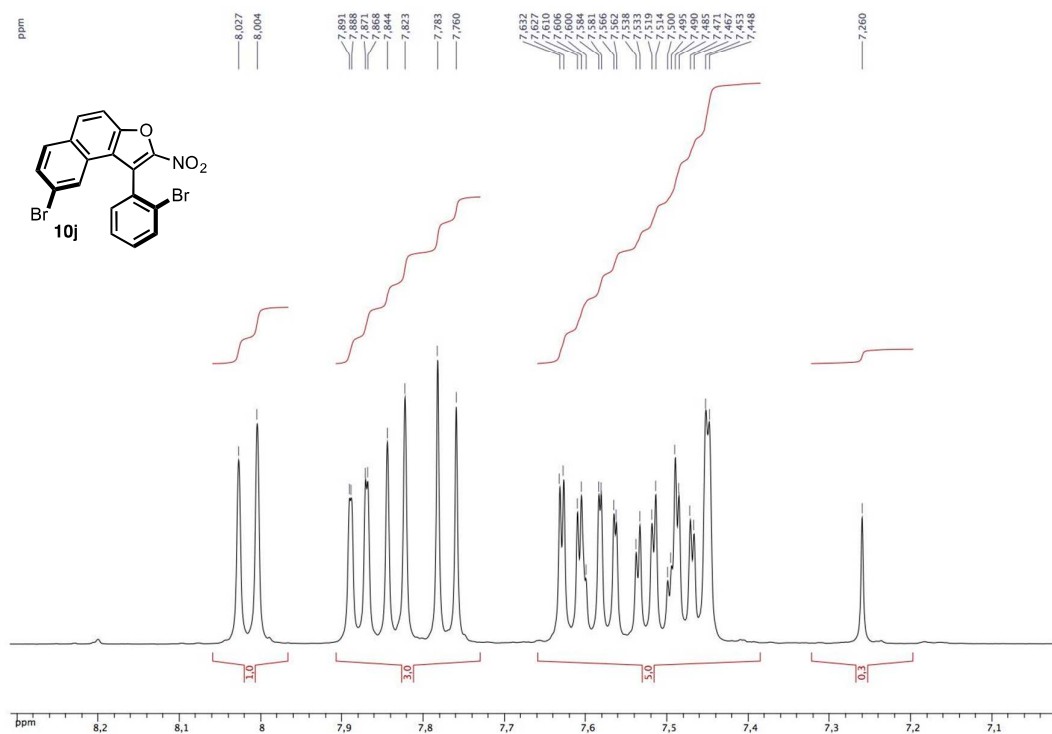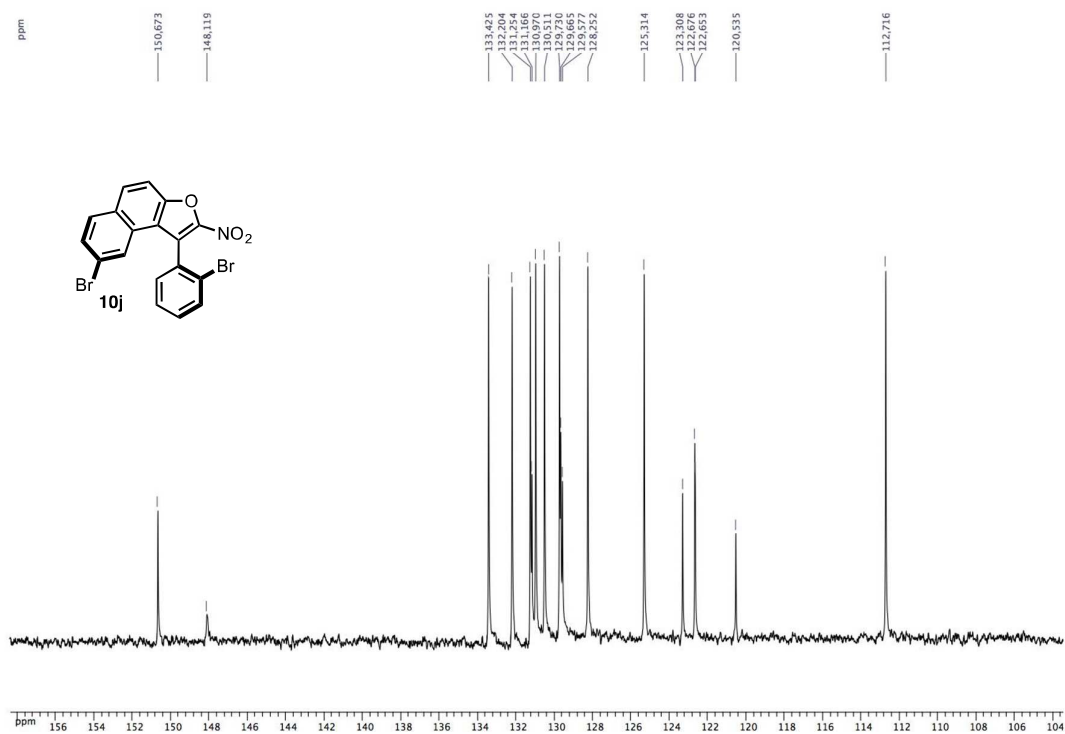

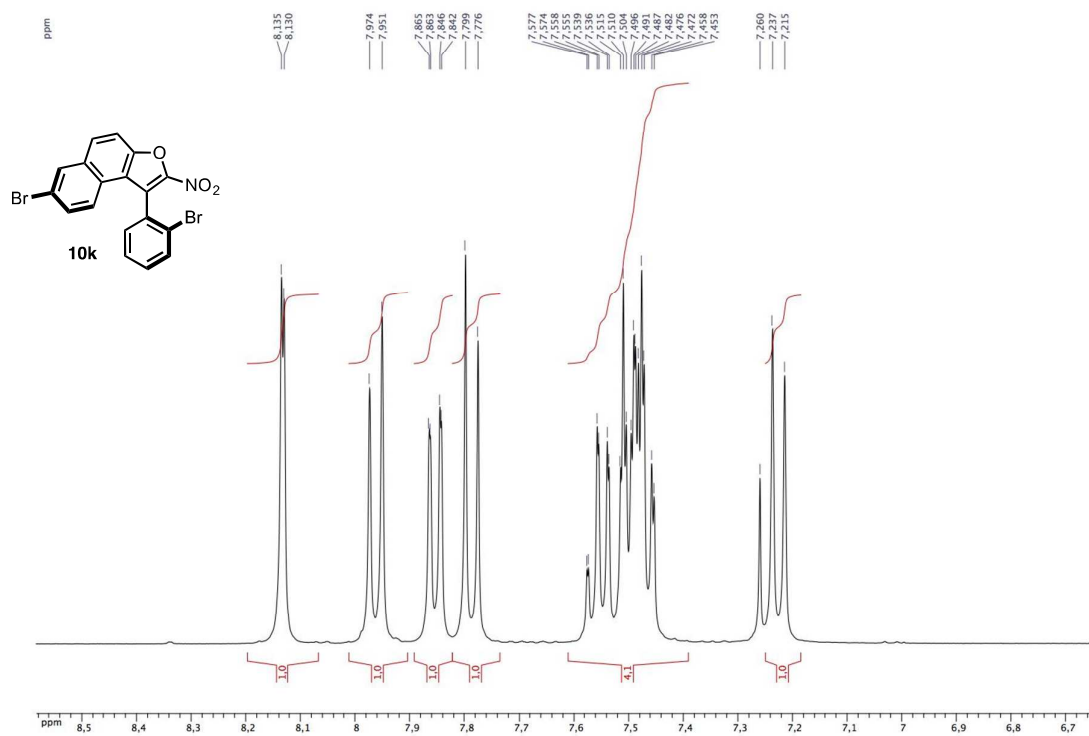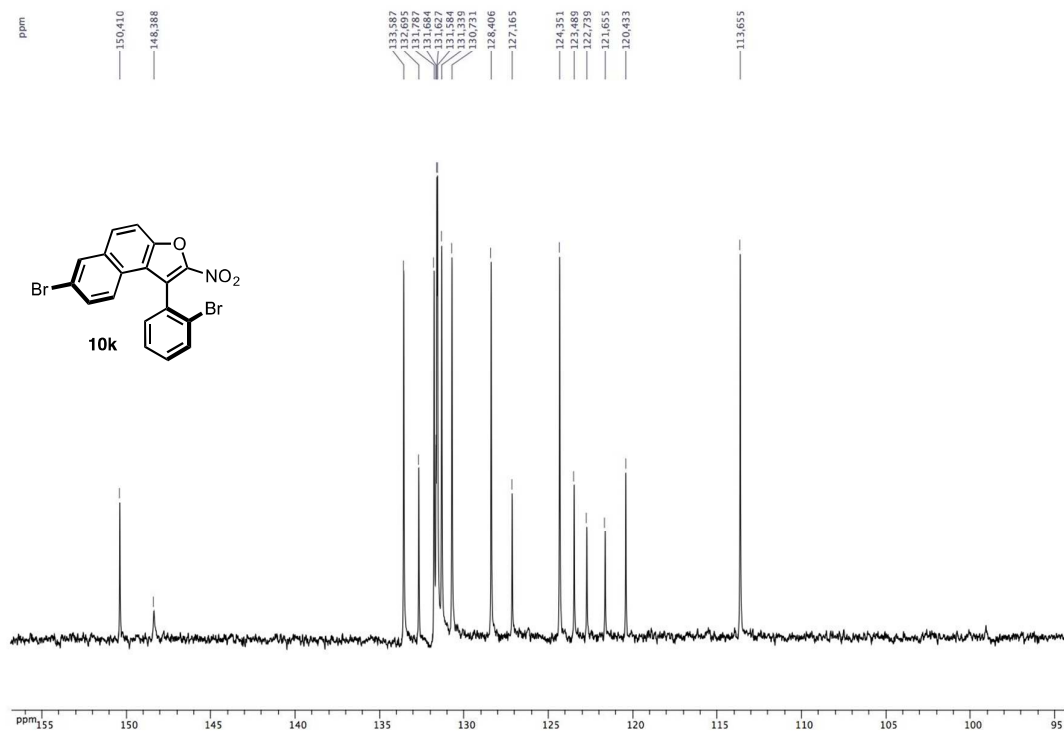

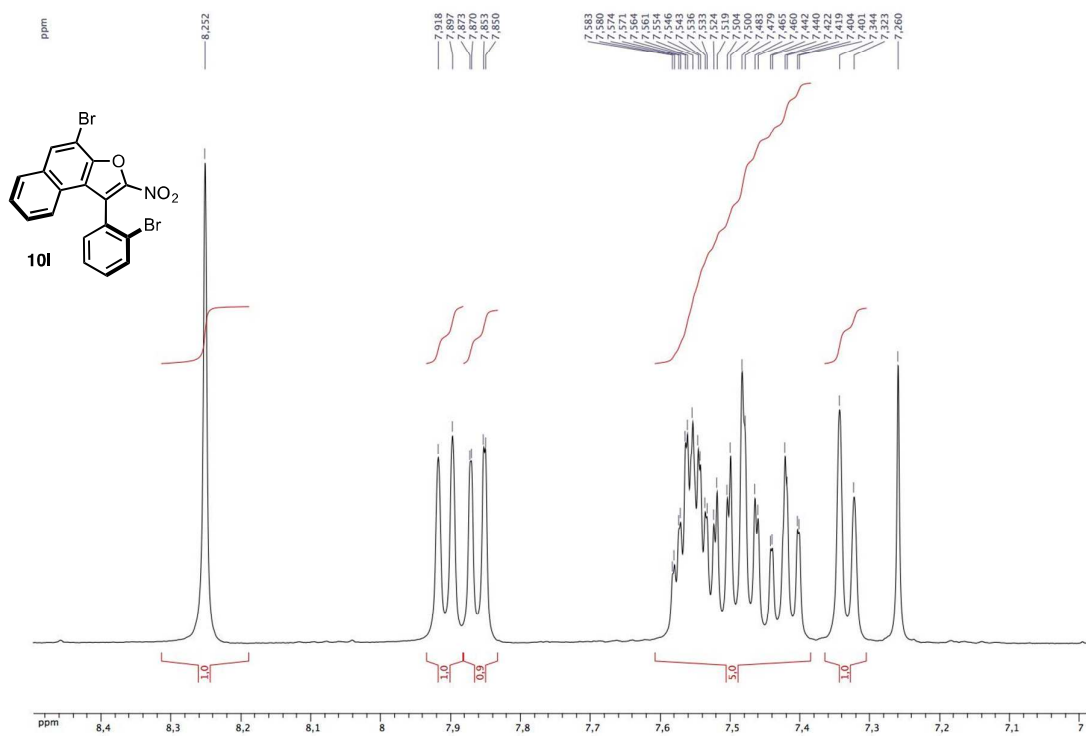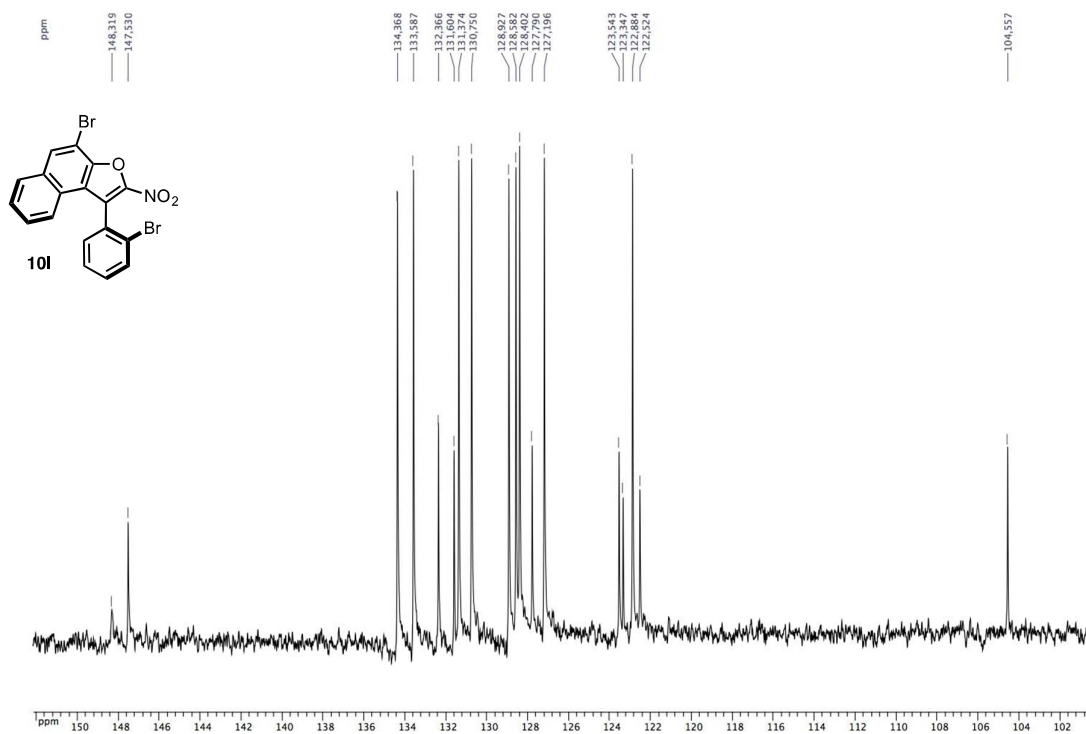

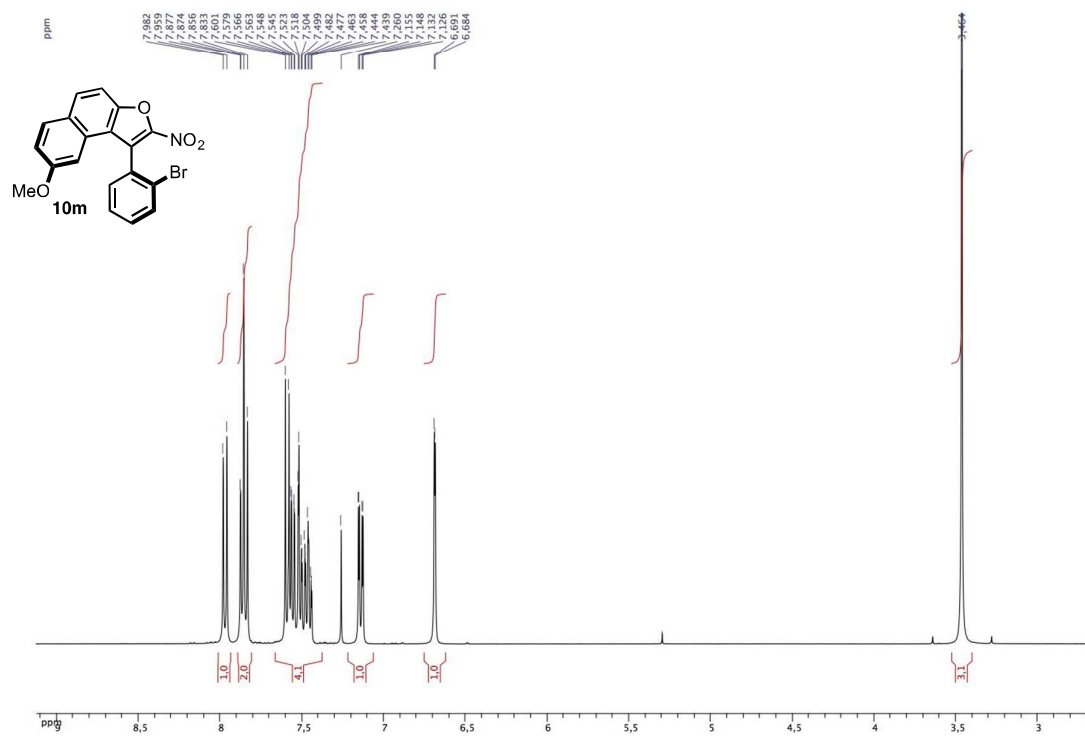

- 
- (2) Bauvois, B.; Puiffe, M.-L.; Bongui, J.-B.; Paillat, S.; Monneret, C.; Dauzonne, D. *J. Med. Chem.* **2003**, *46*, 3900.
- (3) Zhu, Y.; Malerich, J. P.; Rawal, V. R. *Angew. Chem. Int. Ed.* **2010**, *49*, 153–156.
- (4) Xie, J.-W.; Wang, T.; Zhou, F.T. *Tetrahedron Lett.* **2011**, *52*, 2379–2382.
